# Supplementary material
Source: PubMed Central journal article supplement (PMC5927630)
Supplement: NIHMS957815-supplement-supporting_information.pdf [file NIHMS957815-supplement-supporting_information.pdf]

## *Supporting Information*

### **Electron-Rich, Diiron Bis(monothiolato) Carbonyls: C-S Bond Homolysis in a Mixed Valence Diiron Dithiolate**

Qianli Li, Noemie Lalaoui, Toby J. Woods, and Thomas B. Rauchfuss\*  
School of Chemical Sciences  
University of Illinois  
Urbana, IL 61801, USA

Federica Arrigoni and Giuseppe Zampella\*  
Department of Biotechnology and Biosciences  
University of Milano-Bicocca  
Piazza della Scienza 2  
20126-Milan, Italy

#### Contents

|                                                                      |              |
|----------------------------------------------------------------------|--------------|
| I. NMR, IR Spectra, Cyclic voltammograms                             | page S2-S24  |
| II. X-ray Crystallography                                            | page S25-S28 |
| III. Selected DFT-Calculated Bond Distances                          | page S29     |
| IV. DFT Results vs Level of Theory                                   | page S30     |
| V. XYZ Coordinates of DFT-Optimized Geometries (Gas Phase) BP86/TZVP | page S31-45  |

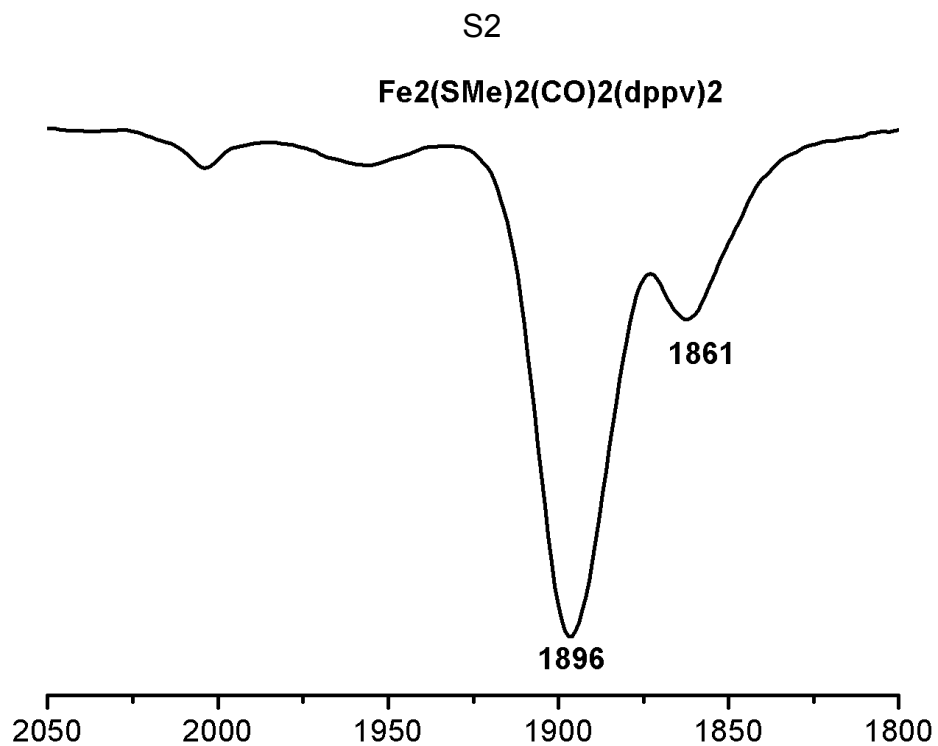

**Figure S1.** FT-IR spectrum of Fe<sub>2</sub>(SMe)<sub>2</sub>(CO)<sub>2</sub>(dppv)<sub>2</sub> ([1]<sup>0</sup>) in CH<sub>2</sub>Cl<sub>2</sub> solution.  
*Assignments:*  $\nu_{\text{CO}}$  = 1896, 1861.

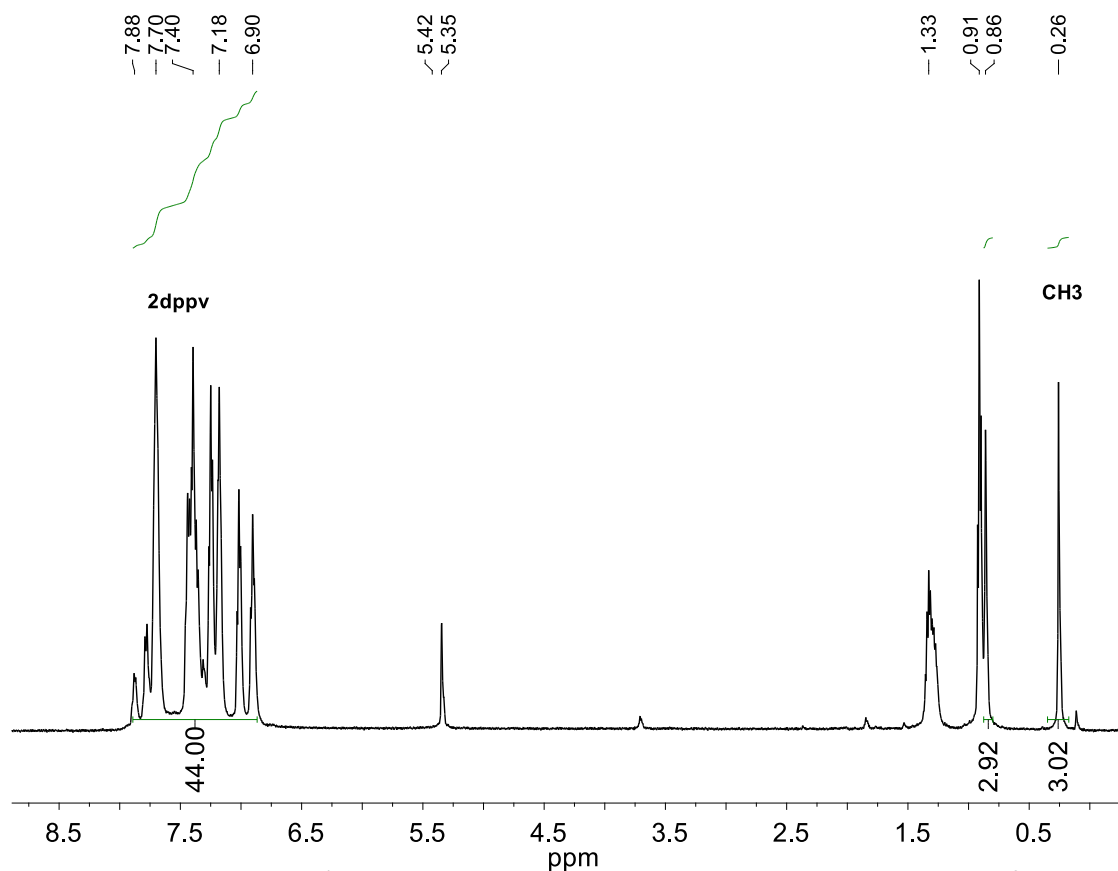

**Figure S2.** 500 MHz  $^1\text{H}$  NMR spectrum of  $\text{Fe}_2(\text{SMe})_2(\text{CO})_2(\text{dppv})_2$  ( $[\mathbf{1}]^0$ ) in  $\text{CD}_2\text{Cl}_2$  solution. Assignments:  $\delta = 6.90\text{--}7.88$ , (m, 44H,  $8\text{C}_6\text{H}_5$ ,  $2\text{PCH}=\text{CHP}$ ); 0.26, 0.86 (s, 6H,  $2\text{CH}_3$ ).

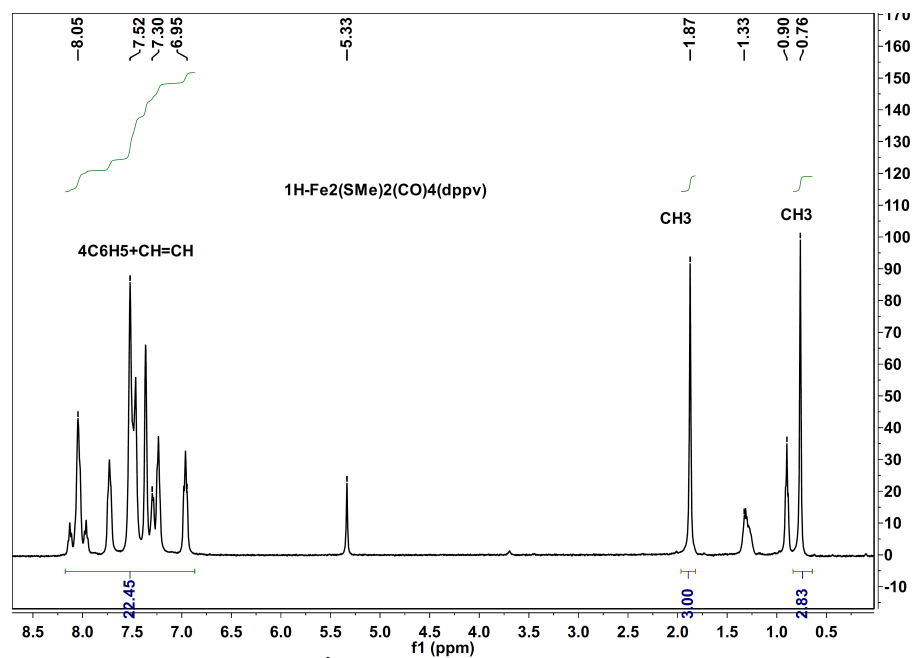

**Figure S3.** 500 MHz  $^1\text{H}$  NMR spectrum of  $\text{Fe}_2(\text{SMe})_2(\text{CO})_4(\text{dppv})$  in  $\text{CD}_2\text{Cl}_2$  solution.

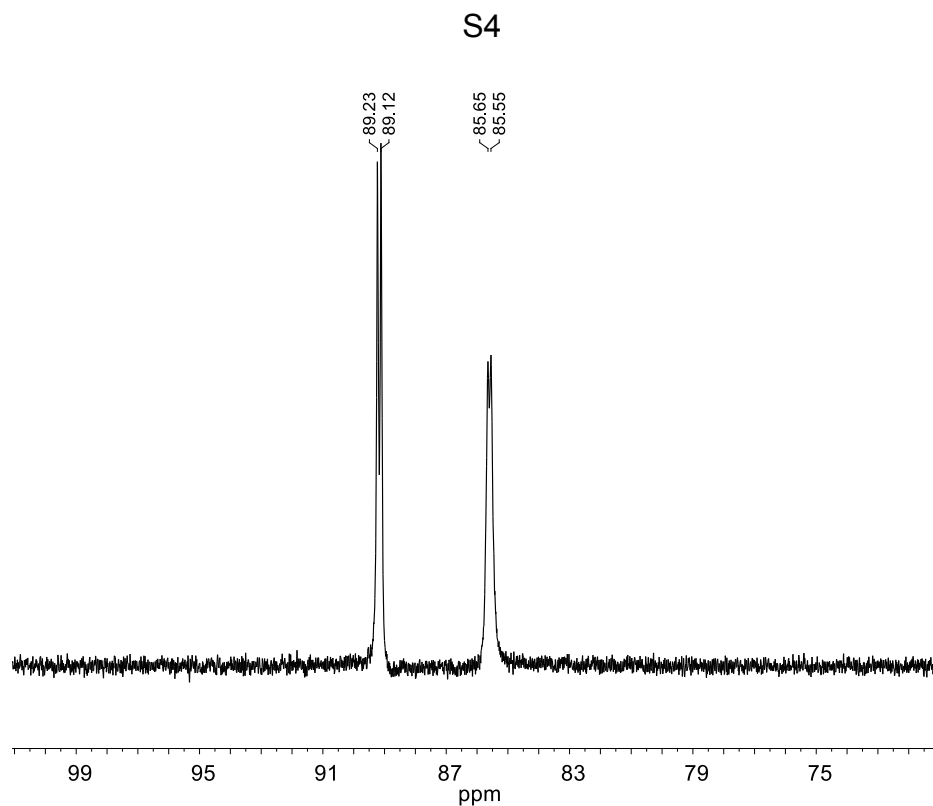

**Figure S4.** 202 MHz  $^{31}\text{P}$  NMR spectrum of  $\text{Fe}_2(\text{SMe})_2(\text{CO})_2(\text{dppv})_2$  ( $[1]^0$ ) in  $\text{CD}_2\text{Cl}_2$  solution. Assignments:  $\delta = 89.2$  (d,  $J_{\text{P-P}} = 20$  Hz),  $85.6$  (d,  $J_{\text{P-P}} = 20$  Hz).

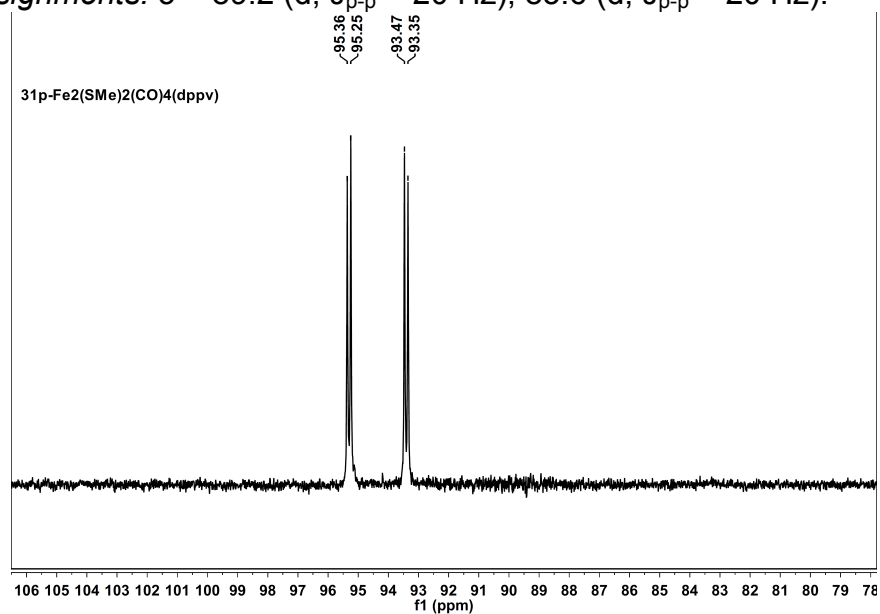

**Figure S5.** 202 MHz  $^{31}\text{P}$  NMR spectrum of  $\text{Fe}_2(\text{SMe})_2(\text{CO})_4(\text{dppv})$  in  $\text{CD}_2\text{Cl}_2$  solution.

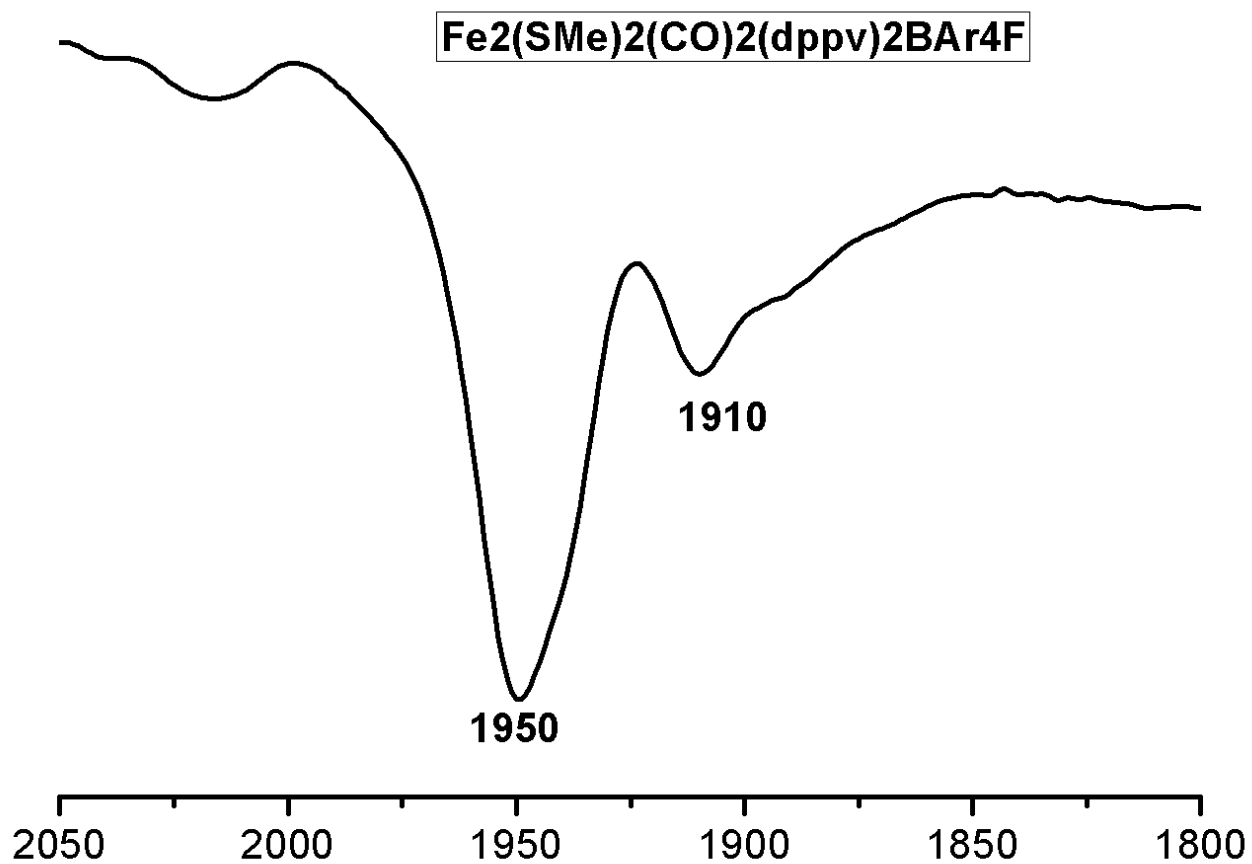

**Figure S6.** FT-IR spectrum of  $[\text{Fe}_2(\text{SMe})_2(\text{CO})_2(\text{dppv})_2]\text{BAr}^{\text{F}}_4$  ( $[\mathbf{1}]\text{BAr}^{\text{F}}_4$ ) generated *in situ* by combining **1** and  $\text{FcBAr}^{\text{F}}_4$  in THF solution. Assignments:  $\nu_{\text{CO}} = 1950, 1910 \text{ cm}^{-1}$ .

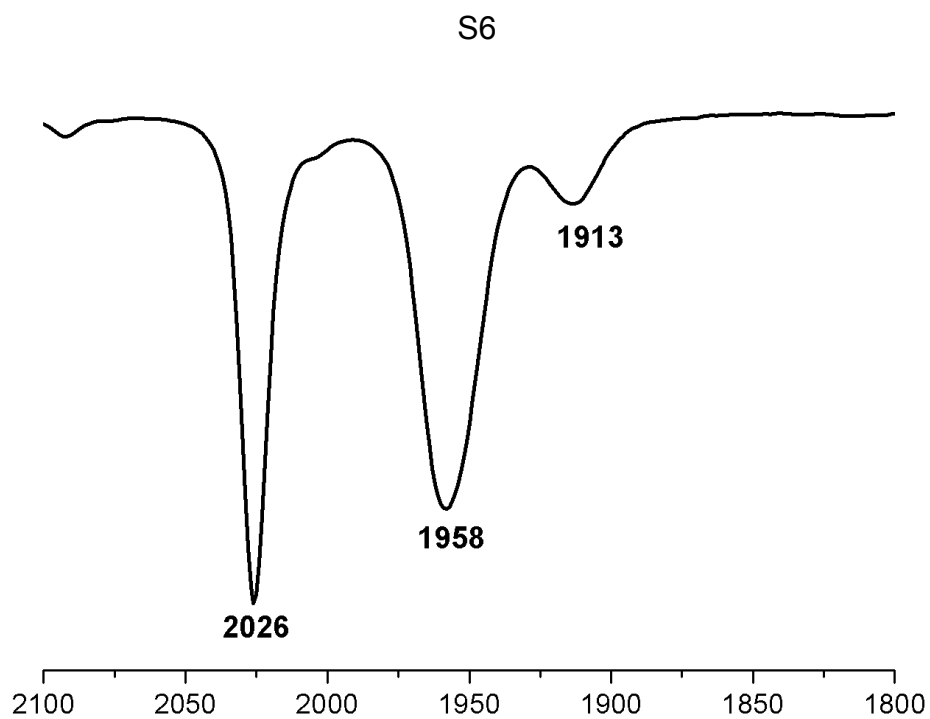

**Figure S7.** FT-IR spectrum of  $\text{Fe}_2(\text{SPh})_2(\text{CO})_4(\text{dppv})$  in  $\text{CH}_2\text{Cl}_2$  solution. *Assignments:*  $\nu_{\text{CO}} = 2026, 1958, 1913 \text{ cm}^{-1}$ .

S7

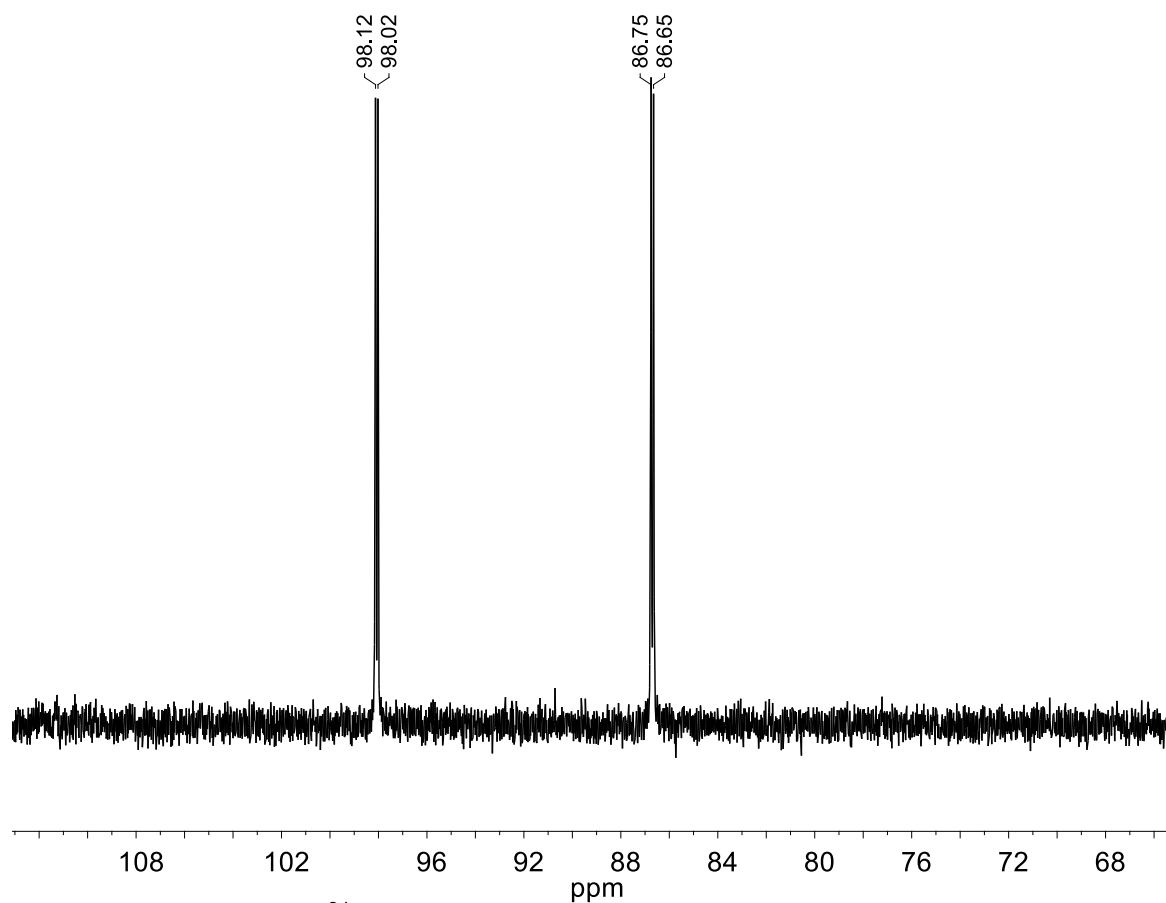

**Figure S8.** 202 MHz  $^{31}\text{P}$  NMR spectrum of  $\text{Fe}_2(\text{SPh})_2(\text{CO})_4(\text{dppv})$  in  $\text{CD}_2\text{Cl}_2$  solution. Assignments:  $\delta = 98.1$  (d,  $J_{\text{p-p}} = 20$  Hz),  $86.7$  (d,  $J_{\text{p-p}} = 20$  Hz).

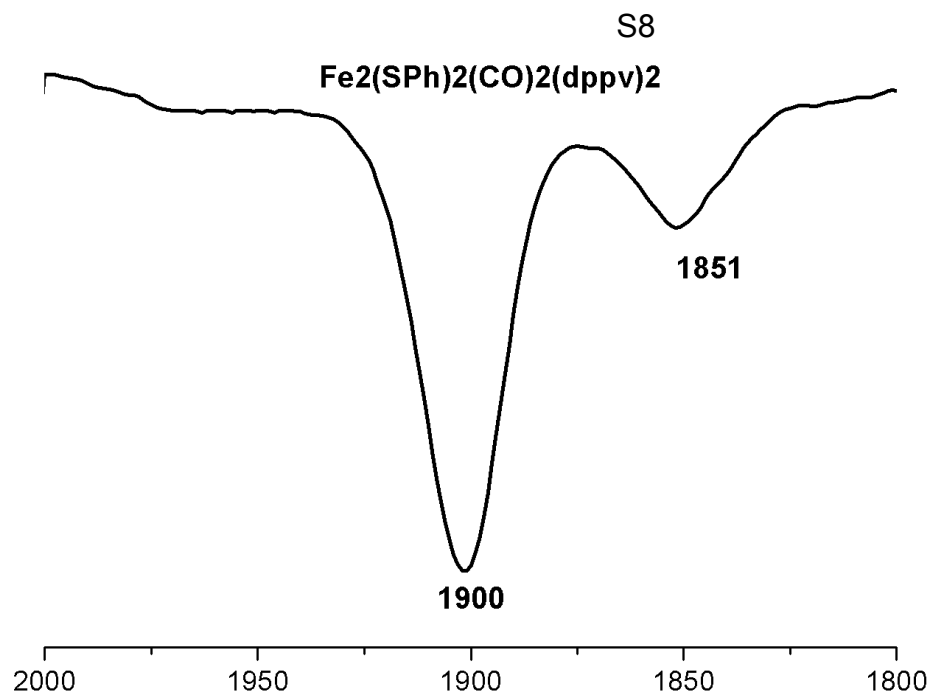

**Figure S9.** FT-IR spectrum of Fe<sub>2</sub>(SPh)<sub>2</sub>(CO)<sub>2</sub>(dppv)<sub>2</sub> ([**2**]<sup>0</sup>) in CH<sub>2</sub>Cl<sub>2</sub> solution. Assignments:  $\nu_{\text{CO}} = 1900, 1851 \text{ cm}^{-1}$ .

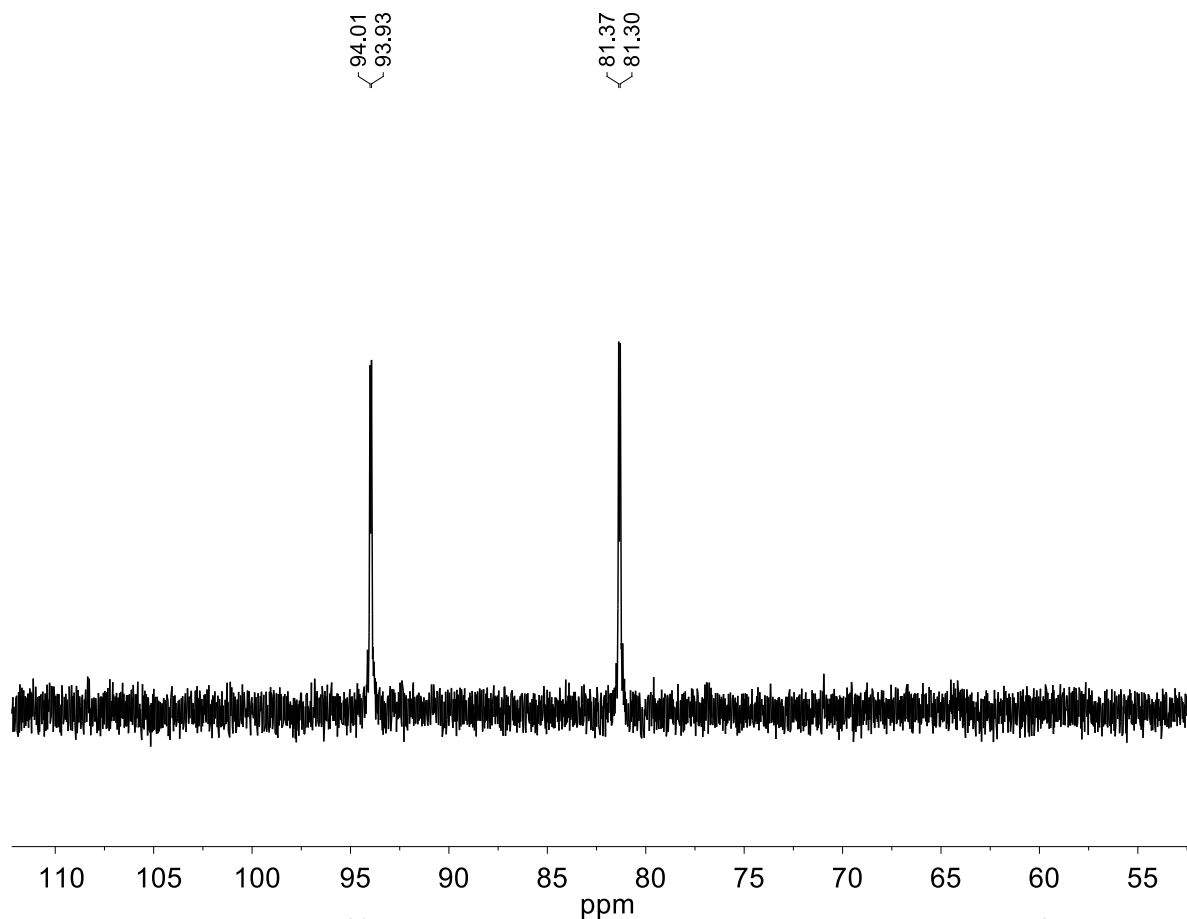

**Figure S10.** 202 MHz <sup>31</sup>P NMR spectrum of Fe<sub>2</sub>(SPh)<sub>2</sub>(CO)<sub>2</sub>(dppv)<sub>2</sub> ([**2**]<sup>0</sup>) in CD<sub>2</sub>Cl<sub>2</sub> solution. Assignments:  $\delta = 94.0$  (d,  $J_{\text{p-p}} = 20$  Hz), 81.3 (d,  $J_{\text{p-p}} = 20$  Hz).



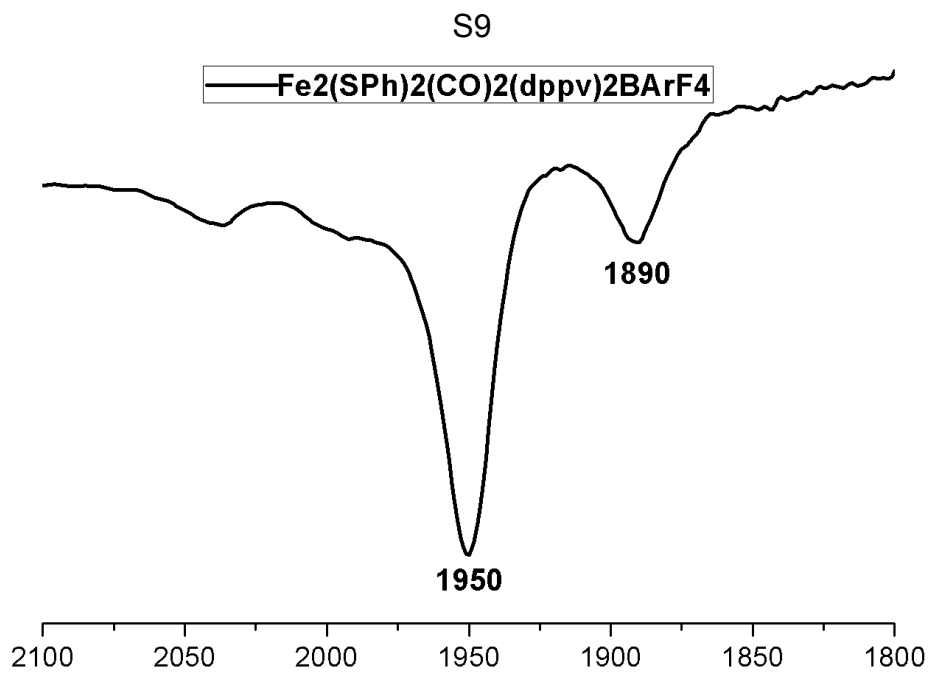

**Figure S11.** FT-IR spectrum of  $[\text{Fe}_2(\text{SPh})_2(\text{CO})_2(\text{dppv})_2]\text{BAr}^{\text{F}}_4$  ( $[\mathbf{2}]\text{BAr}^{\text{F}}_4$ ) generated in situ by combining **2** and  $\text{FcBAr}^{\text{F}}_4$  in THF solution. *Assignments:*  $\nu_{\text{CO}} = 1950, 1890 \text{ cm}^{-1}$ .

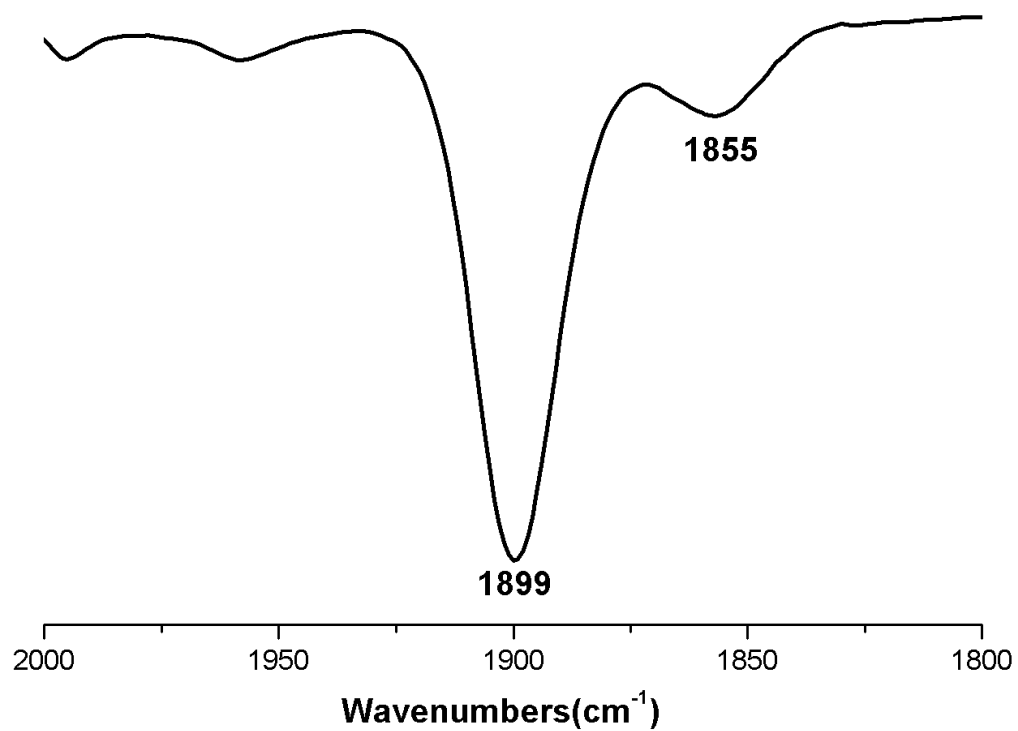

**Figure S12.** FT-IR spectrum of  $\text{Fe}_2(\text{SBn})_2(\text{CO})_2(\text{dppv})_2$  ( $[\mathbf{3}]^0$ ) in  $\text{CH}_2\text{Cl}_2$  solution.  
*Assignments:*  $\nu_{\text{CO}} = 1899, 1855 \text{ cm}^{-1}$ .

S11

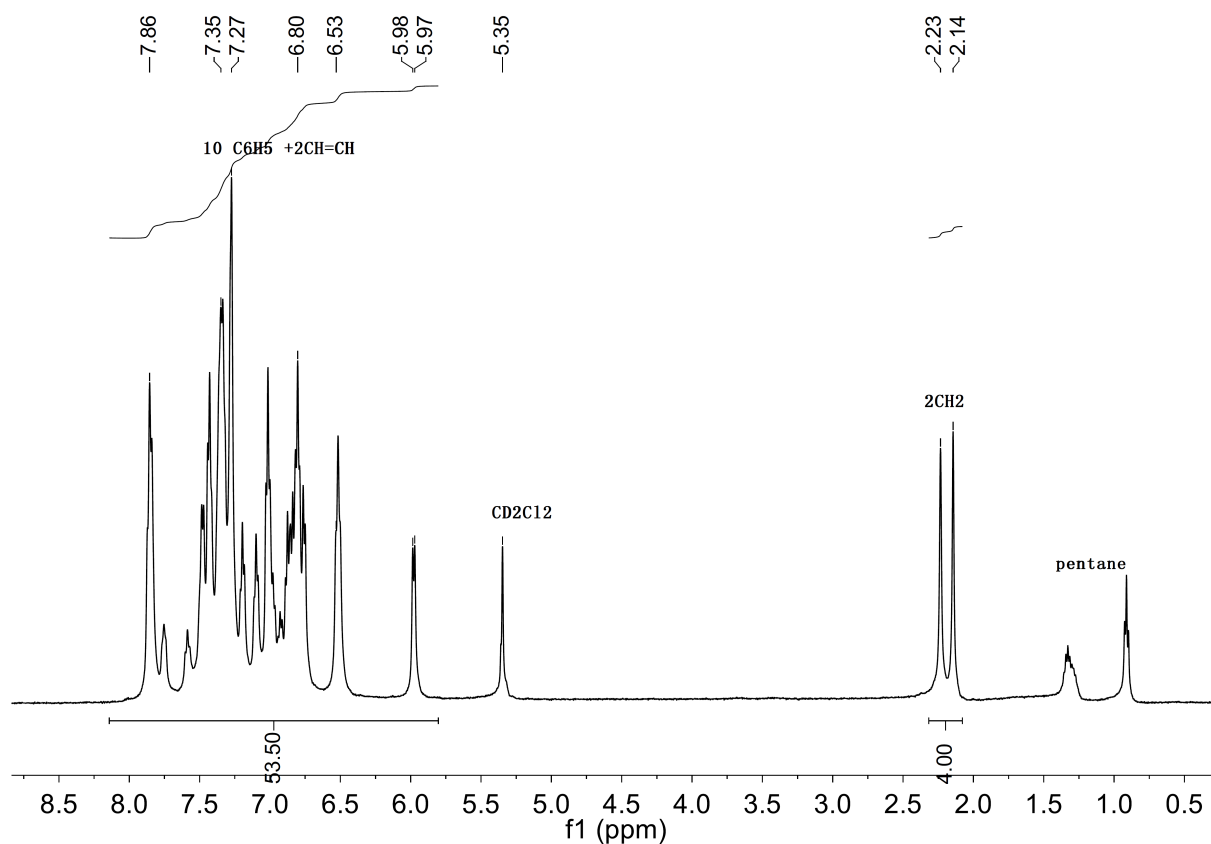

**Figure S13.** 500 MHz  $^1\text{H}$  NMR spectrum of  $\text{Fe}_2(\text{SBn})_2(\text{CO})_2(\text{dppv})_2$  ( $[\mathbf{3}]^0$ ) in  $\text{CD}_2\text{Cl}_2$  solution. Assignments:  $\delta = 5.97\text{-}7.86$ , (m, 54H,  $\text{C}_6\text{H}_5$ , 2 $\text{CH}=\text{CH}$ ); 2.14, 2.23 (s, 4H, 2 $\text{CH}_2$ ).

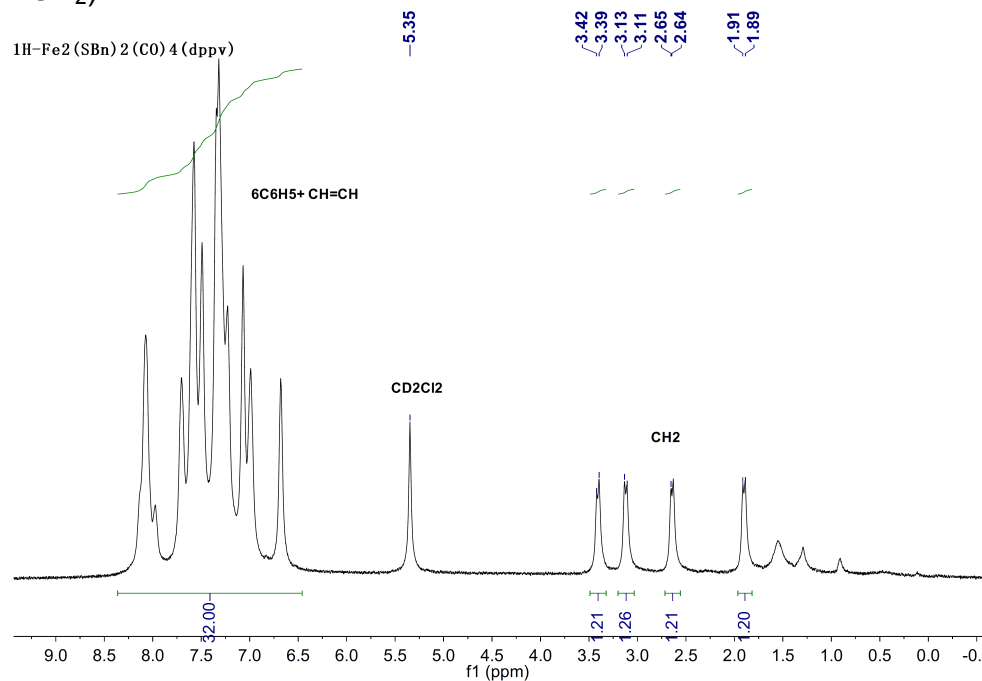

**Figure S14.** 500 MHz  $^1\text{H}$  NMR spectrum of  $\text{Fe}_2(\text{SBn})_2(\text{CO})_4(\text{dppv})$  in  $\text{CD}_2\text{Cl}_2$  solution. Assignments: signals in the range  $\delta$  3.4-1.8  $\text{SCH}_2\text{Ph}$  (signals in the range  $\delta$  1.7 - 0.9 are from pentane).

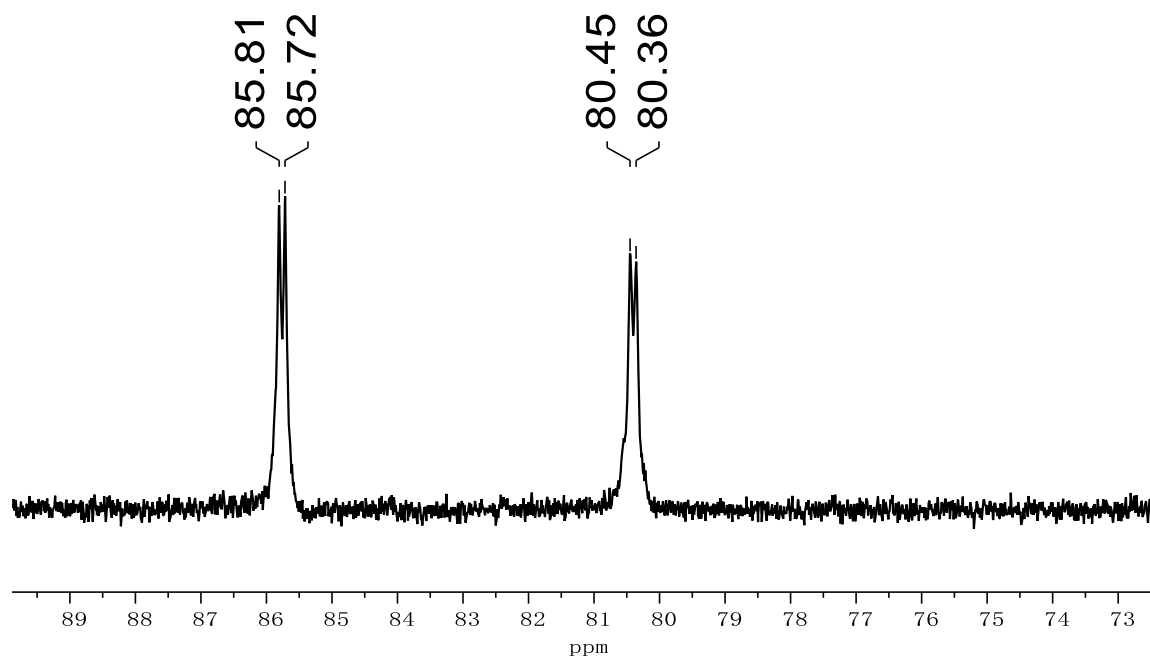

**Figure S15.** 202 MHz  $^{31}\text{P}$  NMR spectrum of  $\text{Fe}_2(\text{SBn})_2(\text{CO})_2(\text{dppv})_2$  ( $[\mathbf{3}]^0$ ) in  $\text{CD}_2\text{Cl}_2$  solution. Assignments:  $\delta = 85.7$  (d,  $J_{\text{p-p}} = 20$  Hz),  $80.3$  (d,  $J_{\text{p-p}} = 20$  Hz).

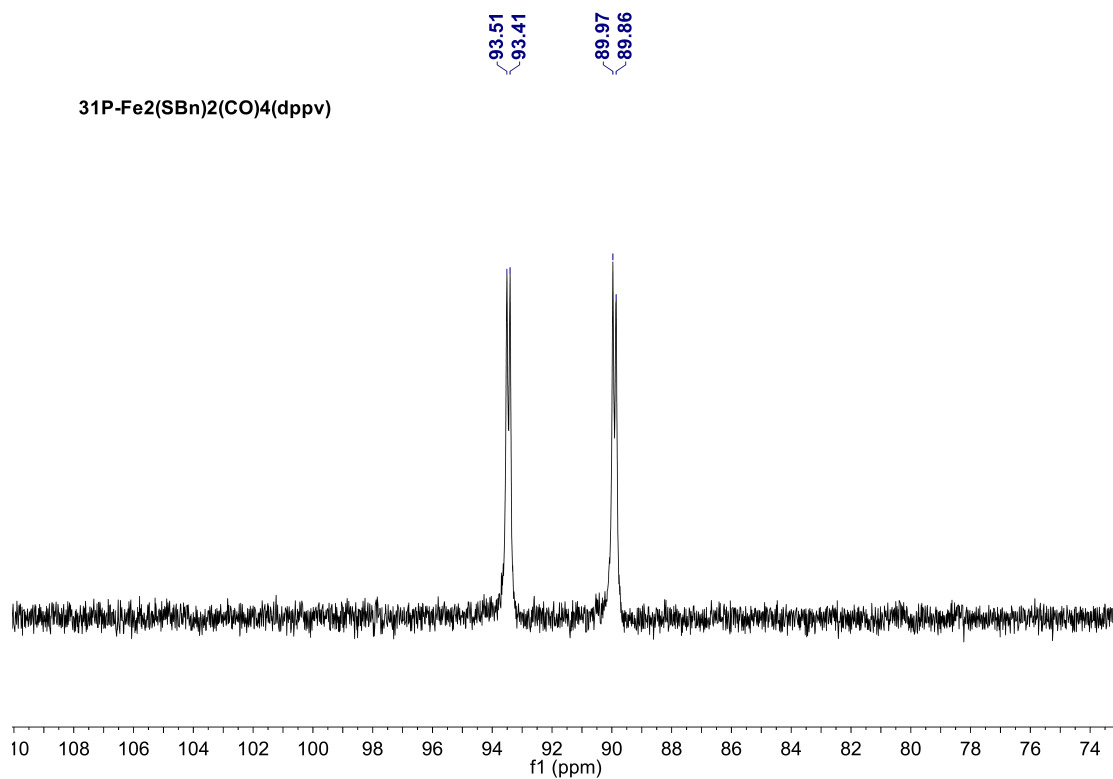

**Figure S16.** 202 MHz  $^{31}\text{P}$  NMR spectrum of  $\text{Fe}_2(\text{SBn})_2(\text{CO})_4(\text{dppv})$  in  $\text{CD}_2\text{Cl}_2$  solution.

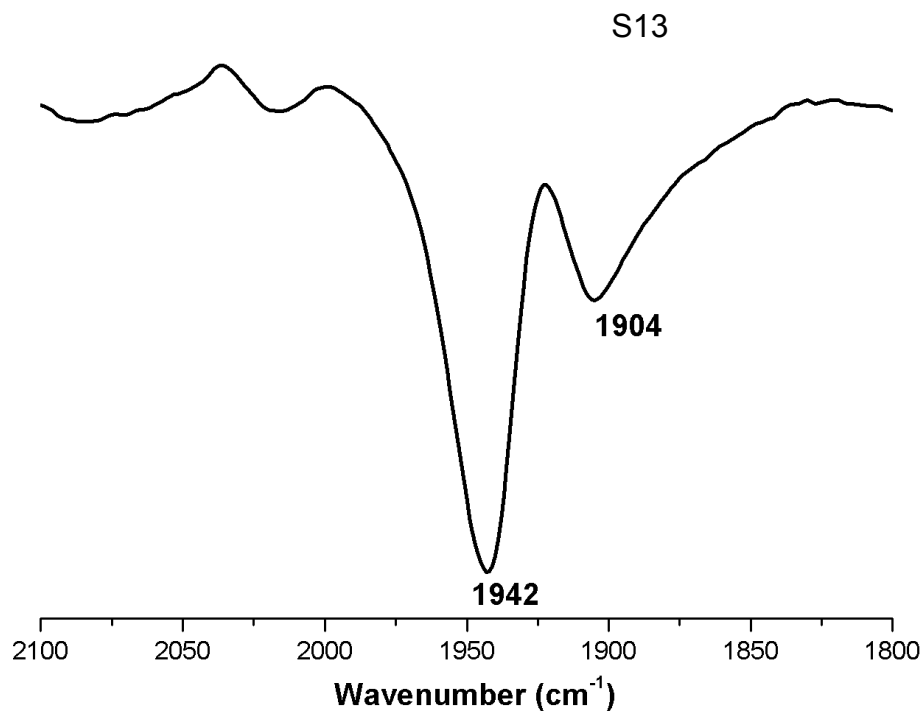

**Figure S17.** FT-IR spectrum of  $[\text{Fe}_2(\text{SBn})_2(\text{CO})_2(\text{dppv})_2]\text{BF}_4$  (**[3]** $\text{BF}_4$ ) in  $\text{CH}_2\text{Cl}_2$  solution.  
*Assignments:*  $\nu_{\text{CO}} = 1942, 1904 \text{ cm}^{-1}$ .

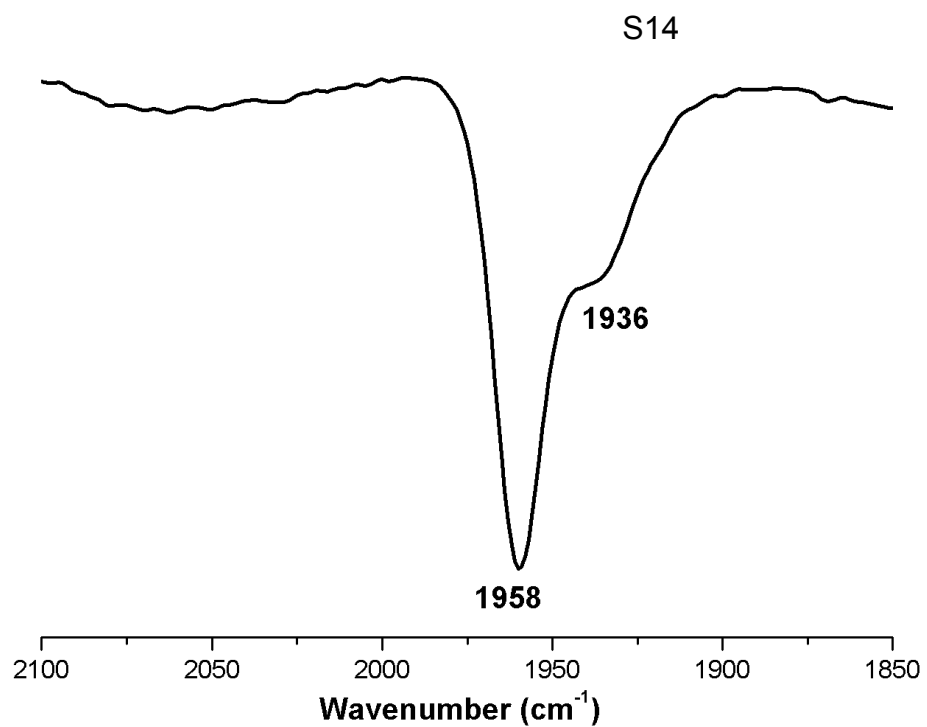

**Figure S18.** FT-IR spectrum of  $[\text{Fe}_2(\text{SBn})(\text{S})(\text{CO})_2(\text{dppv})_2]\text{BF}_4$  ( $[\mathbf{4}]\text{BF}_4$ ) in  $\text{CH}_2\text{Cl}_2$  solution. Assignments:  $\nu_{\text{CO}} = 1958, 1936 \text{ cm}^{-1}$ .

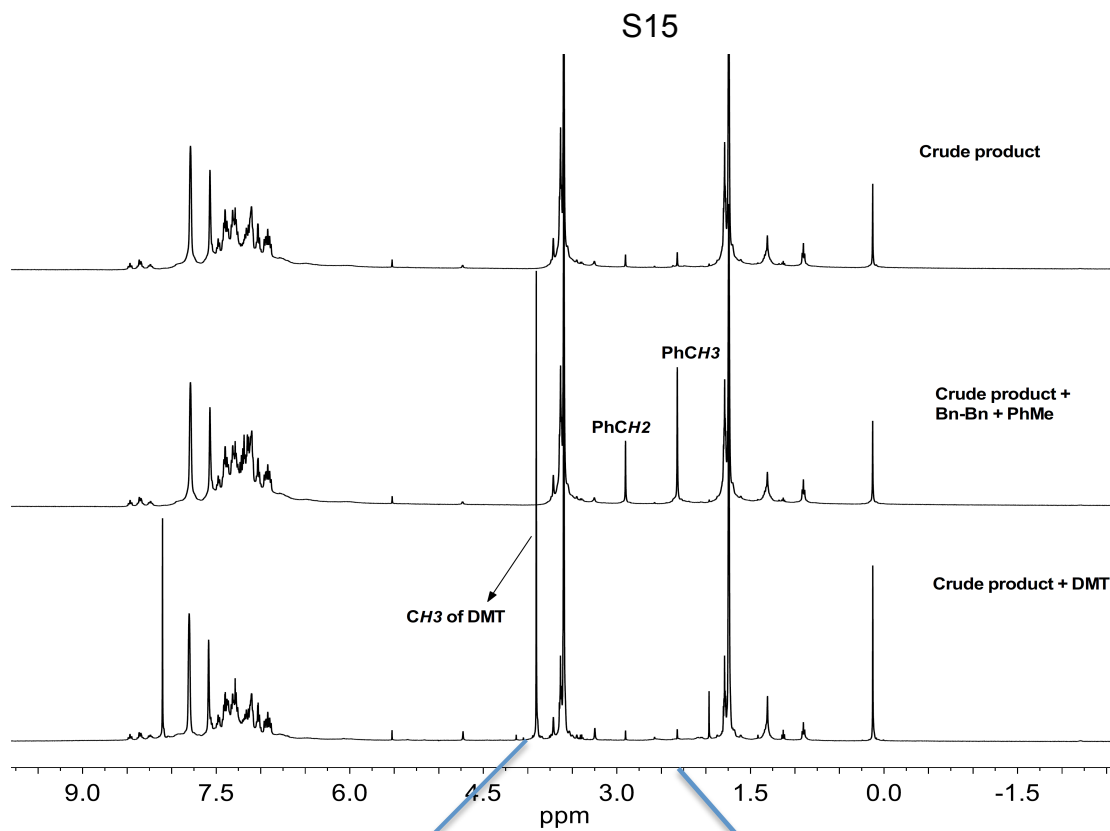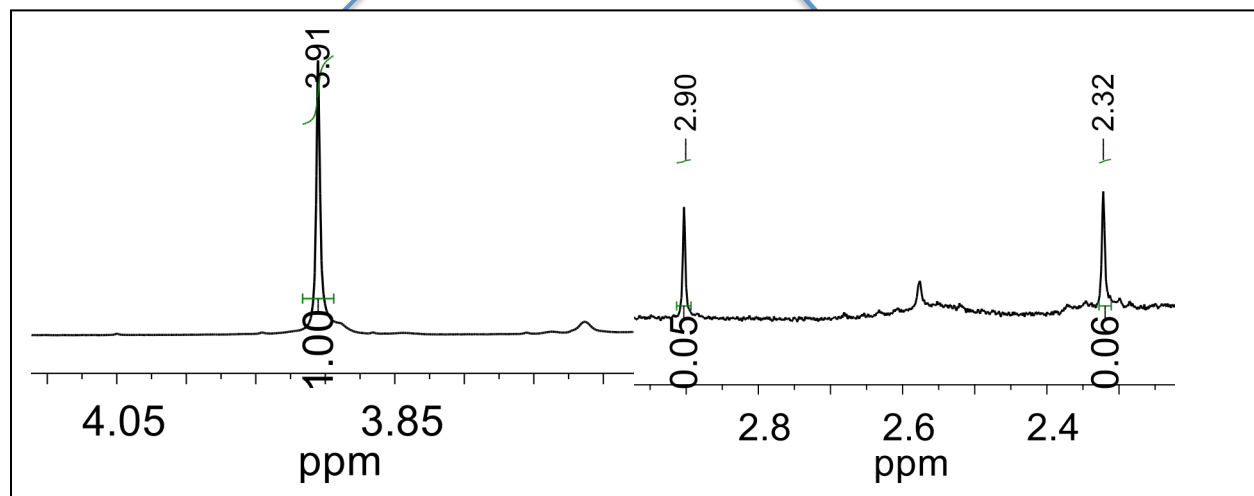

**Figure S19.**  $^1\text{H}$  NMR spectrum of 7 mg of crude  $[\text{Fe}_2(\text{SBn})(\text{S})(\text{CO})_2(\text{dppv})_2]\text{BAr}_4^{\text{F}}$  ( $[\text{3}]\text{BAr}_4^{\text{F}}$ ) and 1 mg DMT (dimethyl terephthalate) in ( $d_8$ -THF solution) followed by the addition of dibenzyl and toluene to confirm assignments.

S16

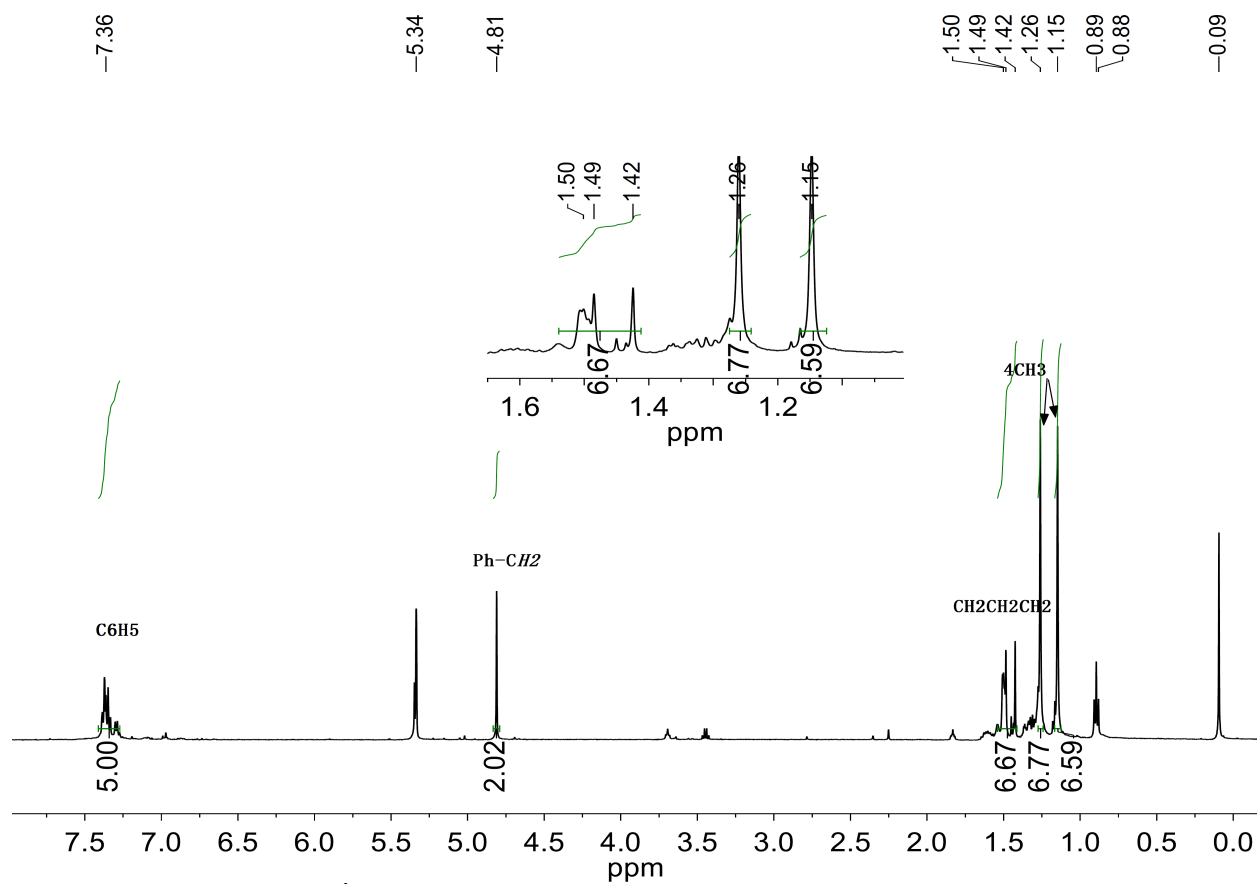

**Figure S20.** 500 MHz  $^1\text{H}$  NMR spectrum of TEMPO- $\text{CH}_2\text{Ph}$  in  $\text{CD}_2\text{Cl}_2$  solution. Assignments:  $\delta = 7.27\text{-}7.38$  (m, 5H,  $\text{C}_6\text{H}_5$ ), 4.81 (s, 2H,  $\text{PhCH}_2$ ), 1.42-1.59 (m, 6H,  $\text{CH}_2\text{CH}_2\text{CH}_2$ ), 1.15, 1.26 (2s, 12H, 4 $\text{CH}_3$ ).



S17

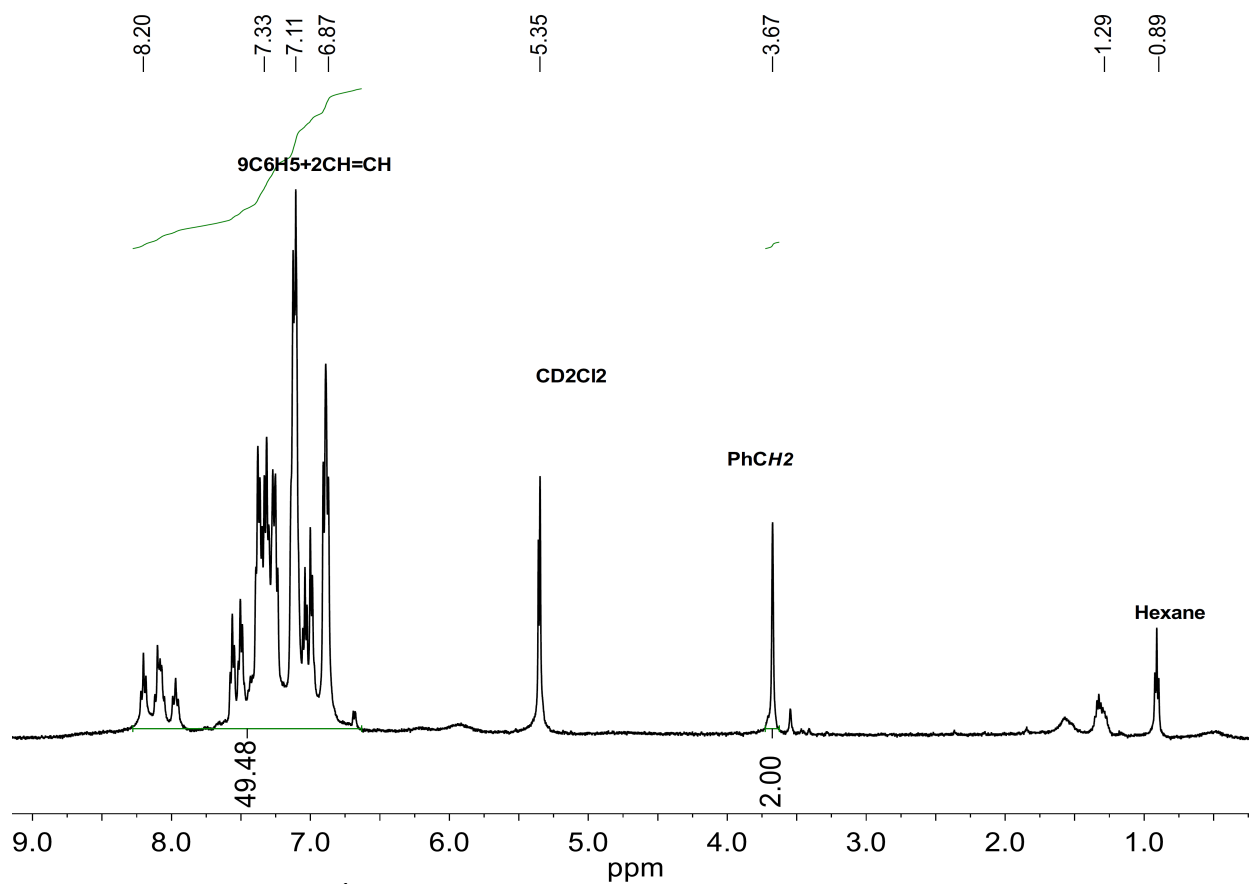

**Figure S21.** 500 MHz  $^1\text{H}$  NMR spectrum of  $[\text{Fe}_2(\text{SBn})(\text{S})(\text{CO})_2(\text{dppv})_2]\text{BF}_4$  ( $[\mathbf{4}]\text{BF}_4$ ) in  $\text{CD}_2\text{Cl}_2$  solution at 20 °C.

*Assignments:*  $\delta = 8.20\text{--}6.87$ , (m, 49H, 9C6H5, 2CH=CH); 3.67(s, 2H, CH<sub>2</sub>).

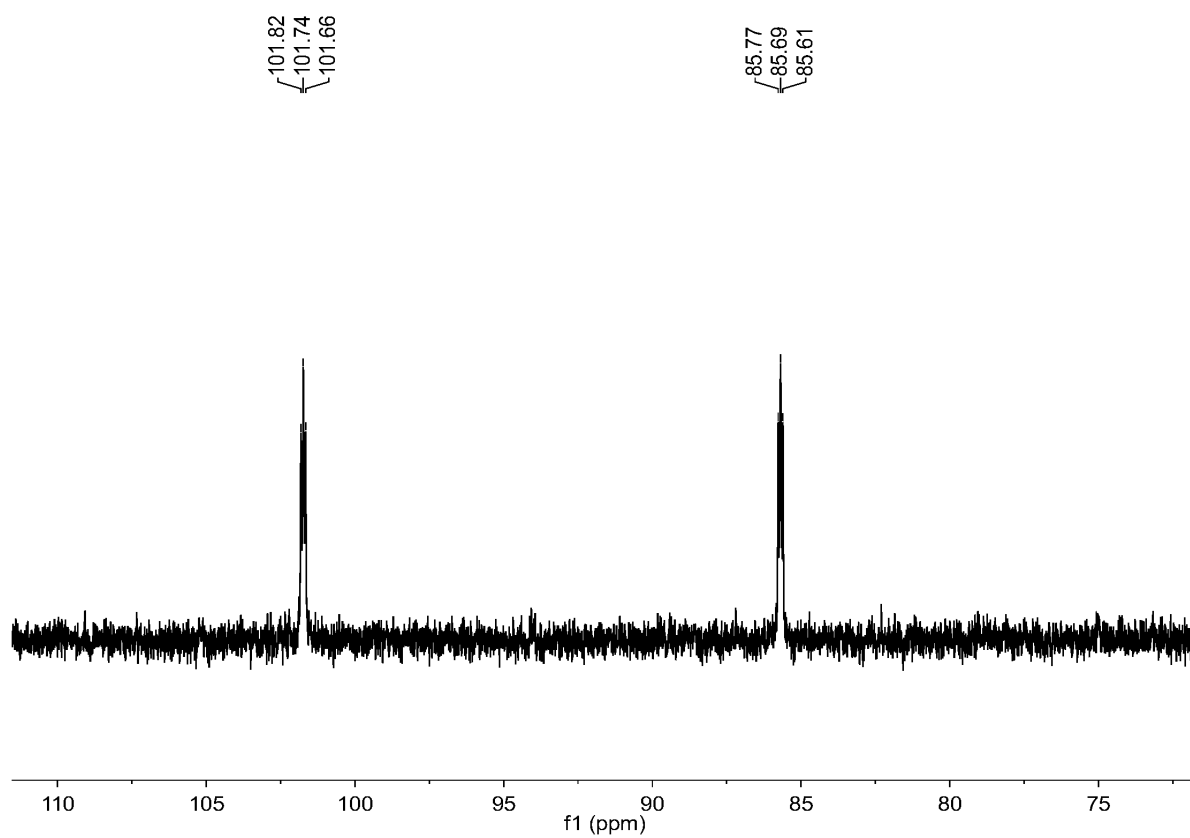

**Figure S22.** 202 MHz  $^{31}\text{P}$  NMR spectrum of  $[\text{Fe}_2(\text{SBn})(\text{S})(\text{CO})_2(\text{dppv})_2]\text{BF}_4$  (**[4]** $\text{BF}_4$ ) in  $\text{CD}_2\text{Cl}_2$  solution at 20 °C. *Assignments:*  $\delta = 101.7$  (t,  $J_{\text{p-p}} = 20$  Hz), 85.6 (t,  $J_{\text{p-p}} = 20$  Hz).

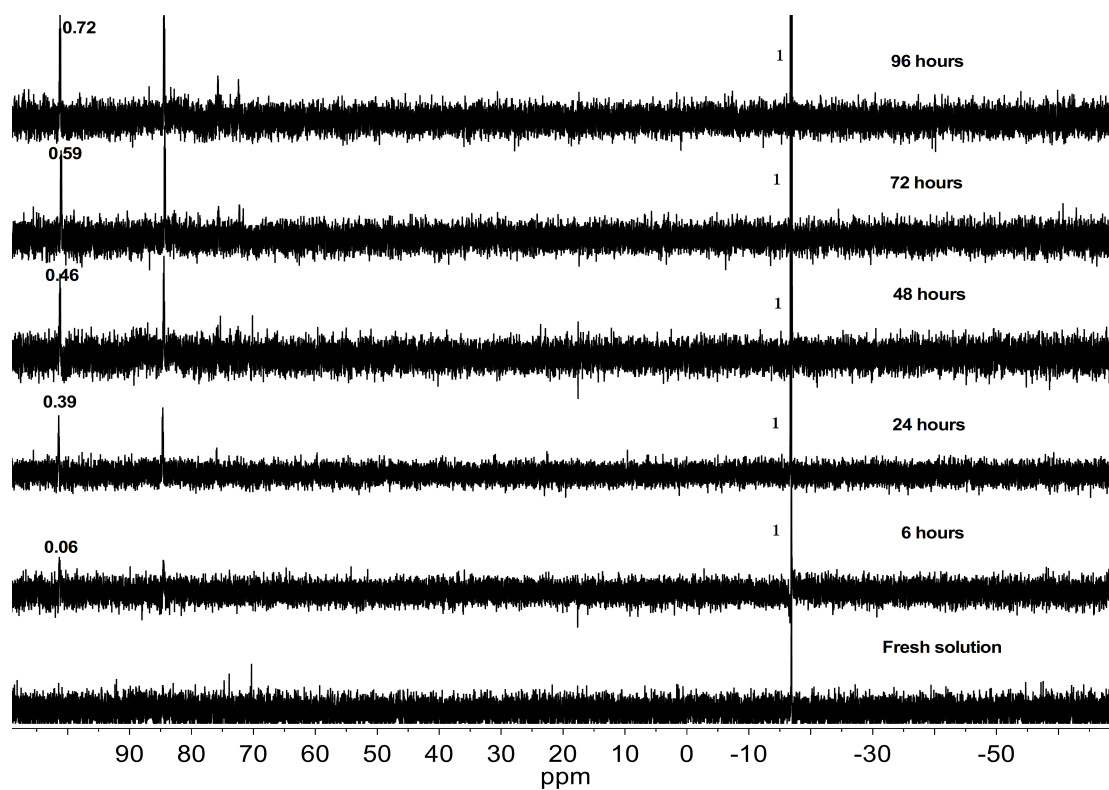

**Figure S23.**  $^{31}\text{P}$  NMR spectra for the conversion of  $[\mathbf{3}]\text{BARF}_4$  (8 mg) in  $d_6$ -benzene (0.6 mL) to  $[\mathbf{4}]\text{BARF}_4$  in presence of  $\text{OP}(\text{OPh})_3$  (2 mg).

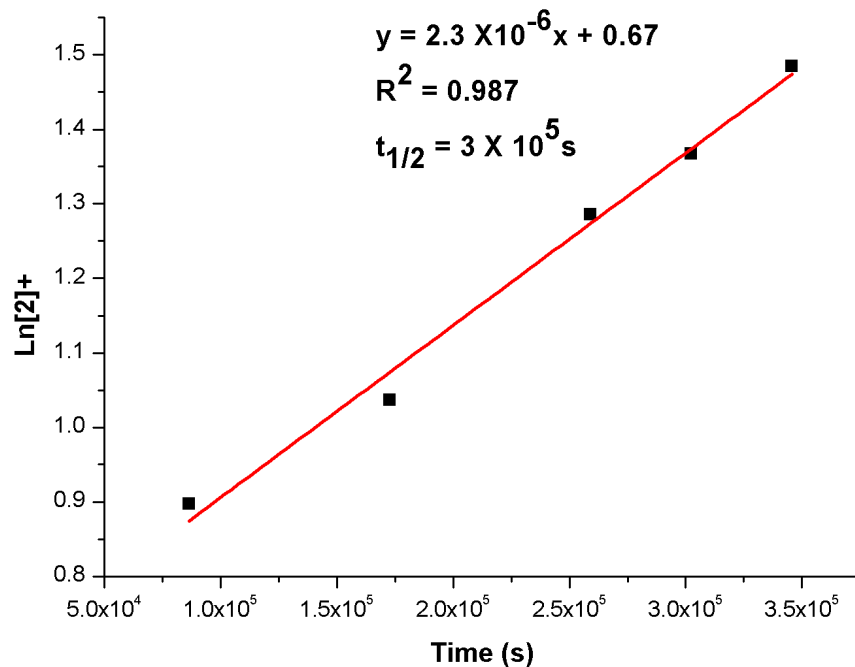

**Figure S24.** Time course for the appearance of  $[\text{Fe}_2(\text{SBn})(\text{S})(\text{CO})_2(\text{dppv})_2]\text{BARF}_4$  from the decomposition of a  $\text{C}_6\text{D}_6$  solution of  $[\text{Fe}_2(\text{SBn})_2(\text{CO})_2(\text{dppv})_2]\text{BARF}_4$ .

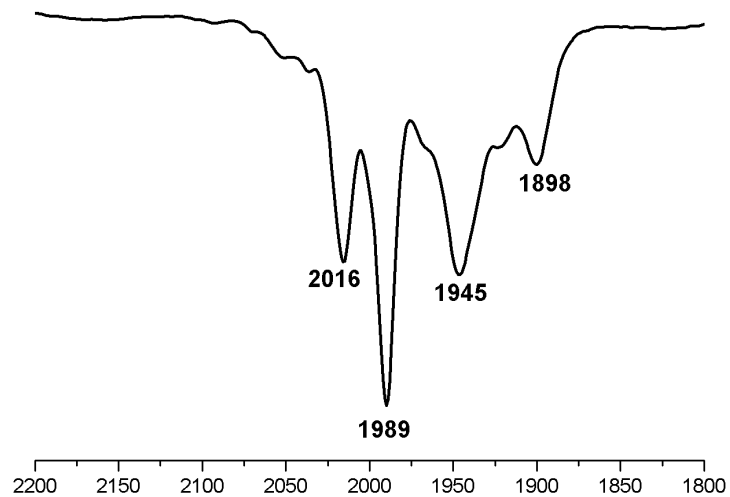

**Figure S25.** FT-IR spectrum of  $[\text{Fe}_2(\text{SBn})(\text{S})(\text{CO})_4(\text{dppv})_2]\text{BF}_4$  (**[5]** $\text{BF}_4$ ) in  $\text{CH}_2\text{Cl}_2$  solution. *Assignments:*  $\nu_{\text{CO}} = 2016, 1989, 1945, 1898 \text{ cm}^{-1}$ .

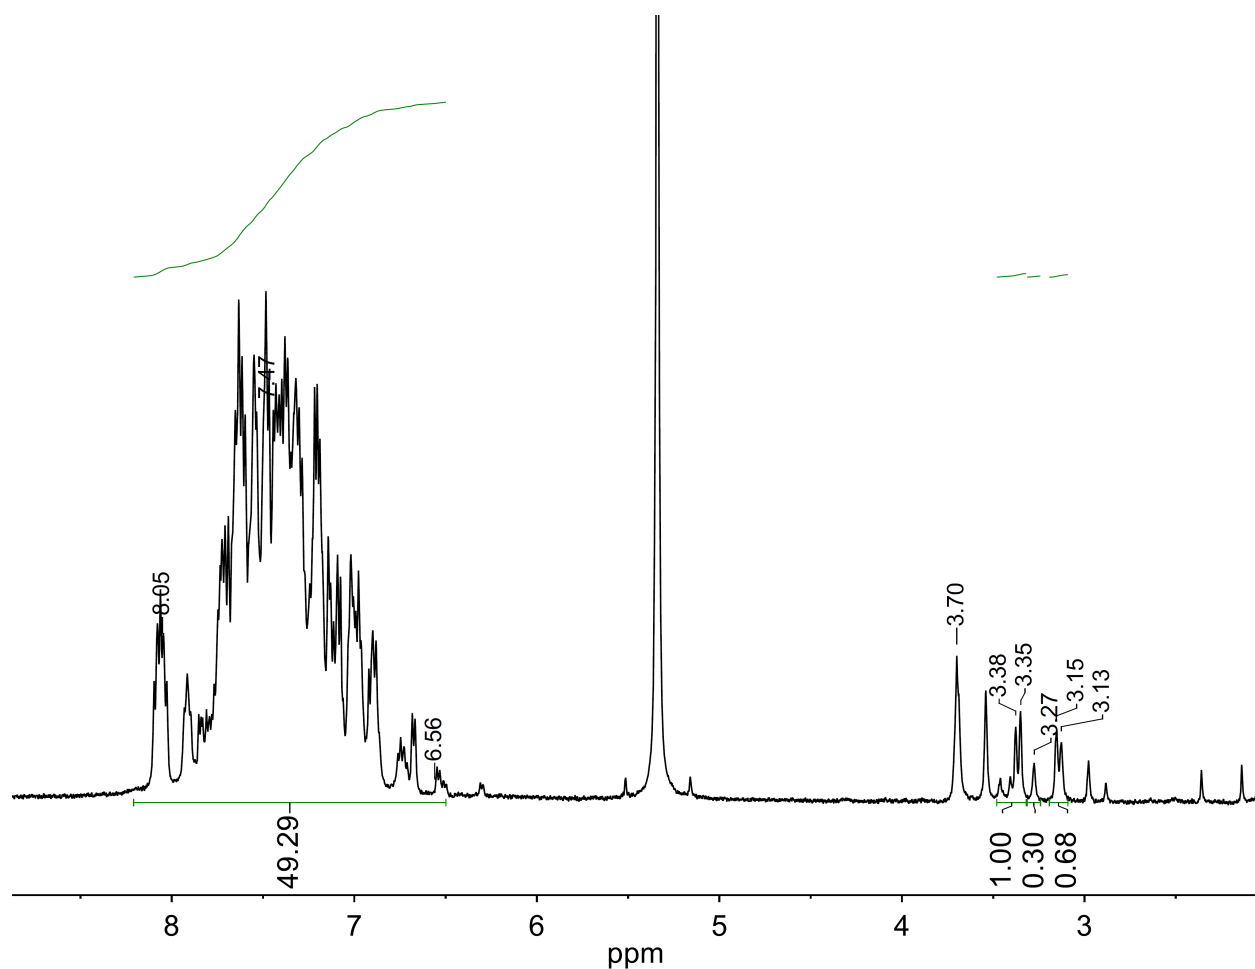

**Figure S26.**  $^1\text{H}$  NMR spectrum (500 MHz,  $\text{CD}_2\text{Cl}_2$ ) of  $[\text{Fe}_2(\text{SBn})(\text{S})(\text{CO})_4(\text{dppv})_2]\text{BF}_4$  (**[5]** $\text{BF}_4$ ) at 20 °C.

*Assignments:*  $\delta$  8.05-6.56, (m, 49H,  $9\text{C}_6\text{H}_5$ , PCH=CHP); 3.38, 3.35, 3.27, 3.15, 3.13 (2H,  $\text{CH}_2$ ).

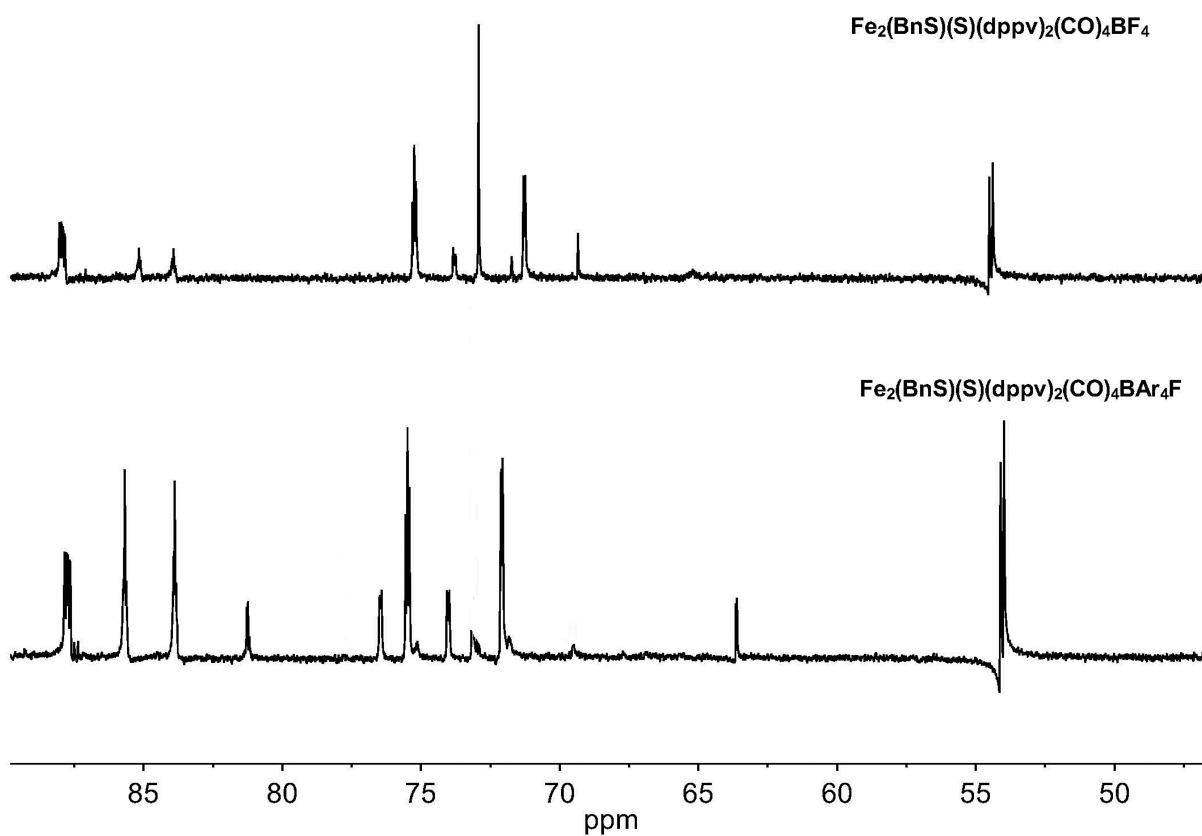

**Figure S27.** *Top:* 202 MHz  $^{31}\text{P}$  NMR spectrum of **[5]** $\text{BF}_4$  in  $\text{CD}_2\text{Cl}_2$  solution at 20 °C. *Assignments:*  $\delta = 88.6, 85.6, 84.9, 75.89, 74.42, 72.30, 71.82, 55.03$ . Signals at  $\delta = 73.5$  and 69.9 are for  $[\text{Fe}_2(\text{SBn})_2(\mu\text{-Cl})(\text{CO})_2(\text{dppv})_2]\text{BF}_4$  and  $[\text{Fe}_2(\text{SBn})_2(\mu\text{-OH})(\text{CO})_2(\text{dppv})_2]\text{BF}_4$ . *Bottom:* 202 MHz  $^{31}\text{P}$  NMR spectrum of **[4]** $\text{BAr}_4^{\text{F}}$  in  $d_6$ -benzene solution at 20 °C. *Below:* one of four possible dibasal/apical-basal isomers. Other isomeric possibilities include many bis(apical-basal) isomers and an all-basal isomer.

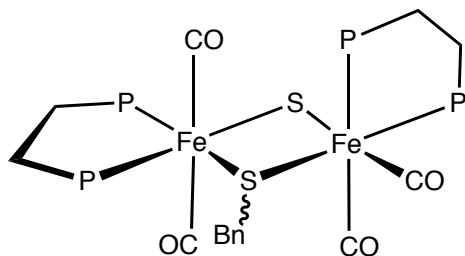

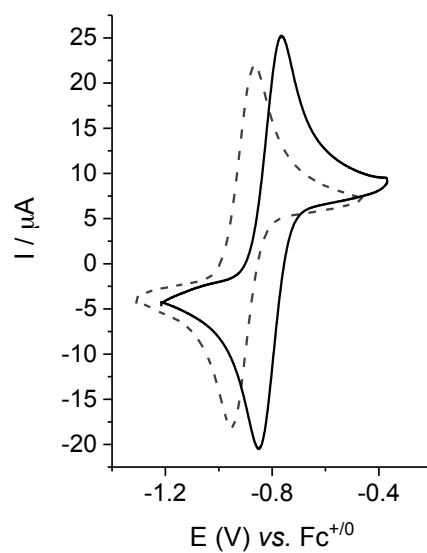

**Figure S28.** Cyclic voltammograms of  $[1]^0$  (dash) and  $[3]^0$  (solid). Conditions: 2.7 mM complex, 0.3 M TBAPF<sub>6</sub> in CH<sub>2</sub>Cl<sub>2</sub> with scan rate of 100 mV/s.

| Compound         | $E_{1/2}$ (V) vs Fc <sup>+/0</sup> | $\Delta E_p$ | $i_{pa}/i_{pc}$ |
|------------------|------------------------------------|--------------|-----------------|
| $[3]^0$ (R = Bn) | -0.81                              | 79           | 1               |
| $[2]^0$ (R = Ph) | -0.85                              | 79           | 1               |
| $[1]^0$ (R = Me) | -0.9                               | 86           | 1               |
| $[2]^+$          | -0.81                              | 78           | 1               |
| $[3]^+$          | -1.1                               | 77           | 0.95            |



## II. X-ray Crystallography

**Table S1.** Crystal data and structure refinement for [3]<sup>0</sup> and [3]BF<sub>4</sub>, [4]BF<sub>4</sub>·2CH<sub>2</sub>Cl<sub>2</sub>, and [5]BF<sub>4</sub>·CH<sub>2</sub>Cl<sub>2</sub>.

|                                   |                                                                                                              |                                                                                                              |
|-----------------------------------|--------------------------------------------------------------------------------------------------------------|--------------------------------------------------------------------------------------------------------------|
| Identification code               | [1] <sup>0</sup>                                                                                             | [1]BF <sub>4</sub>                                                                                           |
| Empirical formula                 | C <sub>69</sub> H <sub>60</sub> Cl <sub>2</sub> Fe <sub>2</sub> O <sub>2</sub> P <sub>4</sub> S <sub>2</sub> | C <sub>68</sub> H <sub>58</sub> BF <sub>4</sub> Fe <sub>2</sub> O <sub>2</sub> P <sub>4</sub> S <sub>2</sub> |
| Formula weight                    | 1291.77                                                                                                      | 1293.65                                                                                                      |
| Temperature                       | 100(2) K                                                                                                     | 100(2) K                                                                                                     |
| Wavelength                        | 0.71073 Å                                                                                                    | 0.71073 Å                                                                                                    |
| Crystal system                    | Triclinic                                                                                                    | Monoclinic                                                                                                   |
| Space group                       | P-1                                                                                                          | P2 <sub>1</sub>                                                                                              |
| Unit cell dimensions              | a = 12.7351(4) Å α = 86.3827(6)°<br>b = 13.0341(4) Å β = 74.4047(6)°<br>c = 20.9862(6) Å γ = 61.9885(5)°     | a = 12.6009(3) Å α = 90°<br>b = 18.6756(4) Å β = 109.0281(4)°<br>c = 13.4119(3) Å γ = 90°                    |
| Volume                            | 2954.02(16) Å <sup>3</sup>                                                                                   | 2983.75(12) Å <sup>3</sup>                                                                                   |
| Z                                 | 2                                                                                                            | 2                                                                                                            |
| Density (calculated)              | 1.452 Mg/m <sup>3</sup>                                                                                      | 1.440 Mg/m <sup>3</sup>                                                                                      |
| Absorption coefficient            | 0.808 mm <sup>-1</sup>                                                                                       | 0.723 mm <sup>-1</sup>                                                                                       |
| F(000)                            | 1336                                                                                                         | 1334                                                                                                         |
| Crystal size                      | 0.306 x 0.161 x 0.062 mm <sup>3</sup>                                                                        | 0.330 x 0.125 x 0.096 mm <sup>3</sup>                                                                        |
| Theta range for data collection   | 2.309 to 28.349°                                                                                             | 2.709 to 28.342°                                                                                             |
| Index ranges                      | -16 ≤ h ≤ 17, -17 ≤ k ≤ 17, -28 ≤ l ≤ 28                                                                     | -16 ≤ h ≤ 16, -24 ≤ k ≤ 24, -17 ≤ l ≤ 17                                                                     |
| Reflections collected             | 203271                                                                                                       | 96860                                                                                                        |
| Independent reflections           | 14711 [R(int) = 0.0545]                                                                                      | 14832 [R(int) = 0.0313]                                                                                      |
| Completeness to theta = 25.242°   | 99.9 %                                                                                                       | 99.8 %                                                                                                       |
| Absorption correction             | Numerical                                                                                                    | Numerical                                                                                                    |
| Max. and min. transmission        | 0.9602 and 0.8458                                                                                            | 0.9561 and 0.8400                                                                                            |
| Refinement method                 | Full-matrix least-squares on F <sup>2</sup>                                                                  | Full-matrix least-squares on F <sup>2</sup>                                                                  |
| Data / restraints / parameters    | 14711 / 0 / 730                                                                                              | 14832 / 188 / 779                                                                                            |
| Goodness-of-fit on F <sup>2</sup> | 1.044                                                                                                        | 1.062                                                                                                        |
| Final R indices [I > 2σ(I)]       | R1 = 0.0286, wR2 = 0.0640                                                                                    | R1 = 0.0218, wR2 = 0.0534                                                                                    |
| R indices (all data)              | R1 = 0.0374, wR2 = 0.0677                                                                                    | R1 = 0.0231, wR2 = 0.0540                                                                                    |
| Absolute structure parameter      | n/a                                                                                                          | -0.007(2)                                                                                                    |
| Extinction coefficient            | n/a                                                                                                          | n/a                                                                                                          |
| Largest diff. peak and hole       | 0.402 and -0.380 e.Å <sup>-3</sup>                                                                           | 0.425 and -0.390 e.Å <sup>-3</sup>                                                                           |

## S26

|                                   |                                                                                                                              |                                                                                                                              |
|-----------------------------------|------------------------------------------------------------------------------------------------------------------------------|------------------------------------------------------------------------------------------------------------------------------|
| Identification code               | [2]BF <sub>4</sub> ·2CH <sub>2</sub> Cl <sub>2</sub>                                                                         | [3]BF <sub>4</sub> ·CH <sub>2</sub> Cl <sub>2</sub>                                                                          |
| Empirical formula                 | C <sub>63</sub> H <sub>55</sub> BCl <sub>4</sub> F <sub>4</sub> Fe <sub>2</sub> O <sub>2</sub> P <sub>4</sub> S <sub>2</sub> | C <sub>64</sub> H <sub>53</sub> BCl <sub>2</sub> F <sub>4</sub> Fe <sub>2</sub> O <sub>4</sub> P <sub>4</sub> S <sub>2</sub> |
| Formula weight                    | 1372.38                                                                                                                      | 1343.47                                                                                                                      |
| Temperature                       | 100(2) K                                                                                                                     | 100(2) K                                                                                                                     |
| Wavelength                        | 0.71073 Å                                                                                                                    | 0.71073 Å                                                                                                                    |
| Crystal system                    | Monoclinic                                                                                                                   | Monoclinic                                                                                                                   |
| Space group                       | P2 <sub>1</sub> /c                                                                                                           | P2 <sub>1</sub> /n                                                                                                           |
| Unit cell dimensions              | a = 10.3348(2) Å α = 90°                                                                                                     | a = 11.9296(4) Å α = 90°                                                                                                     |
|                                   | b = 27.0056(6) Å β = 103.1233(6)°                                                                                            | b = 24.6134(7) Å β = 101.8542(6)°                                                                                            |
|                                   | c = 22.3320(5) Å γ = 90°                                                                                                     | c = 20.8732(6) Å γ = 90°                                                                                                     |
| Volume                            | 6070.0(2) Å <sup>3</sup>                                                                                                     | 5998.2(3) Å <sup>3</sup>                                                                                                     |
| Z                                 | 4                                                                                                                            | 4                                                                                                                            |
| Density (calculated)              | 1.502 Mg/m <sup>3</sup>                                                                                                      | 1.488 Mg/m <sup>3</sup>                                                                                                      |
| Absorption coefficient            | 0.885 mm <sup>-1</sup>                                                                                                       | 0.810 mm <sup>-1</sup>                                                                                                       |
| F(000)                            | 2808                                                                                                                         | 2752                                                                                                                         |
| Crystal size                      | 0.465 x 0.109 x 0.076 mm <sup>3</sup>                                                                                        | 0.24 x 0.142 x 0.11 mm <sup>3</sup>                                                                                          |
| Theta range for data collection   | 2.405 to 25.384°                                                                                                             | 2.405 to 28.336°                                                                                                             |
| Index ranges                      | -11 ≤ h ≤ 12, -32 ≤ k ≤ 32, -26 ≤ l ≤ 26                                                                                     | -15 ≤ h ≤ 15, -32 ≤ k ≤ 32, -27 ≤ l ≤ 27                                                                                     |
| Reflections collected             | 73393                                                                                                                        | 112208                                                                                                                       |
| Independent reflections           | 11140 [R(int) = 0.0394]                                                                                                      | 14912 [R(int) = 0.0370]                                                                                                      |
| Completeness to theta = 25.242°   | 99.9 %                                                                                                                       | 99.9 %                                                                                                                       |
| Absorption correction             | Numerical                                                                                                                    | Semi-empirical from equivalents                                                                                              |
| Max. and min. transmission        | 1.0000 and 0.8523                                                                                                            | 0.94807 and 0.89941                                                                                                          |
| Refinement method                 | Full-matrix least-squares on F <sup>2</sup>                                                                                  | Full-matrix least-squares on F <sup>2</sup>                                                                                  |
| Data / restraints / parameters    | 11140 / 120 / 795                                                                                                            | 14912 / 113 / 780                                                                                                            |
| Goodness-of-fit on F <sup>2</sup> | 1.070                                                                                                                        | 1.083                                                                                                                        |
| Final R indices [I > 2σ(I)]       | R1 = 0.0370, wR2 = 0.0984                                                                                                    | R1 = 0.0307, wR2 = 0.0739                                                                                                    |
| R indices (all data)              | R1 = 0.0441, wR2 = 0.1028                                                                                                    | R1 = 0.0366, wR2 = 0.0775                                                                                                    |
| Extinction coefficient            | n/a                                                                                                                          | n/a                                                                                                                          |
| Largest diff. peak and hole       | 0.654 and -0.980 e.Å <sup>-3</sup>                                                                                           | 0.718 and -0.892 e.Å <sup>-3</sup>                                                                                           |

Intensity data for [3]<sup>0</sup> were collected on a Bruker D8 Venture kappa diffractometer equipped with a Photon 100 CMOS detector. An I $\mu$ s microfocus source provided the Mo K $\alpha$  radiation ( $\lambda = 0.71073 \text{ \AA}$ ) that was monochromated with multilayer mirrors. The sample was mounted on a 0.3 mm loop with the minimal amount of Paratone-N oil. Data was collected as a series of  $\phi$  and/or  $\omega$  scans. Data were collected at 100 K using a cold stream of N<sub>2</sub>. The collection, cell refinement, and integration of intensity data were carried out with the APEX3 software (1). A face-indexed absorption correction was performed numerically with SADABS (2). The structure was solved with intrinsic phasing methods using SHELXS (3) and refined with the full-matrix least-squares program SHELXL (3). All H atoms were included as riding idealized contributors.

Intensity data for [3]BF<sub>4</sub> were collected on a Bruker D8 Venture kappa diffractometer equipped with a Photon 100 CMOS detector. An I $\mu$ s microfocus source provided the Mo K $\alpha$  radiation ( $\lambda = 0.71073 \text{ \AA}$ ) that was monochromated with multilayer mirrors. The sample was mounted on a 0.3 mm loop with the minimal amount of Paratone-N oil. Data were collected as a series of  $\phi$  and/or  $\omega$  scans. Data were collected at 100 K using a cold stream of N<sub>2</sub>. The collection, cell refinement, and integration of intensity data were carried out with the APEX3 software (1). A face-indexed absorption correction was performed numerically with SADABS (2). The structure was solved with direct methods using SHELXS (3) and refined with the full-matrix least-squares program SHELXL (3). One phenyl ring was found to be disordered over two orientations. The disordered phenyl rings were constrained to be perfect hexagons. Similar displacement amplitudes (esd 0.005) were imposed on disordered sites overlapping by less than the sum of van der Waals radii. Similarity restraints (esd 0.01  $\text{\AA}$ ) were also imposed on the C---C bond distances connecting the disordered phenyl rings to the ligand phosphorus atom. The site occupancy ratio of the two phenyl ring orientations was allowed to freely refine; at convergence the ratio was 0.69(2):0.31(2). All H atoms were included as riding idealized contributors. On the basis of 7189 unmerged Friedel opposites, the fractional contribution of the racemic twin was negligible (4,5). The absolute structure parameter  $y$  was calculated using PLATON (6). The resulting value was  $y = -0.012(2)$  indicating that the absolute structure has probably been determined correctly.

Intensity data for [4]BF<sub>4</sub> were collected on a Bruker D8 Venture kappa diffractometer equipped with a Photon 100 CMOS detector. An I $\mu$ s microfocus source provided the Mo K $\alpha$  radiation ( $\lambda = 0.71073 \text{ \AA}$ ) that was monochromated with multilayer mirrors. The sample was mounted on a 0.3 mm loop with the minimal amount of Paratone-N oil. Data was collected as a series of  $\phi$  and/or  $\omega$  scans. Data was collected at 100 K using a cold stream of N<sub>2</sub>. The collection, cell refinement, and integration of intensity data was carried out with the APEX3 software (1). A face-indexed absorption correction was performed numerically with SADABS (2). The structure was solved with intrinsic phasing methods using SHELXT (7) and refined with the full-matrix least-squares program SHELXL (3). Both of the dichloromethane solvate molecules were modeled as disordered over two orientations. Similar displacement amplitudes (esd 0.005) were imposed on disordered sites overlapping by less than the sum of van der Waals radii. The 1,2 and 1,3 distances of the minor disordered components were restrained (esd 0.01, 0.02  $\text{\AA}$ ) to be similar to the major disordered components. The site occupancy ratio of the disordered sites was allowed to freely refine. At convergence, the ratios were 0.821(7):0.179(7) for the solvate molecule containing C62 and 0.551(4):0.449(4) for the solvate molecule containing C63. All H atoms were included as riding idealized contributors.

Intensity data for [5]BF<sub>4</sub> were collected on a Bruker D8 Venture kappa diffractometer equipped with a Photon 100 CMOS detector. An I $\mu$ s microfocus source provided the Mo K $\alpha$  radiation ( $\lambda =$

0.71073 Å) that was monochromated with multilayer mirrors. The sample was mounted on a 0.3 mm loop with the minimal amount of Paratone-N oil. Data were collected as a series of  $\varphi$  and/or  $\omega$  scans. Data was collected at 100 K using a cold stream of N<sub>2</sub>. The collection, cell refinement, and integration of intensity data were carried out with the APEX3 software.<sup>1</sup> A semi-empirical absorption correction was performed with SADABS. The structure was solved with intrinsic methods using SHELXT and refined with the full-matrix least-squares program SHELXL. One Cl atom on the dichloromethane solvate molecule was disordered over 2 orientations. The disordered C---Cl bond distances and Cl-C-Cl bond angles were restrained to be similar (esd 0.01 Å and 0.02° respectively). The displacement parameters for the 2 Cl positions were constrained to be equivalent. The disordered BF<sub>4</sub> had disordered rotation about the B1-F1 bond. F 2, 3, and 4 were disordered over 2 orientations. All B---F bond distances and F-B-F bond angles were restrained to be similar (esd 0.02 Å and 0.04° respectively). Similar displacement amplitudes (esd 0.01) were imposed on F disordered sites overlapping by less than the sum of van der Waals radii. All H atoms were included as riding idealized contributors.

#### References

(1) Bruker (2016). APEX3. Bruker AXS, Inc., Madison, Wisconsin, USA.

### III. Selected DFT-Calculated Bond Distances

**Table S2.** Main geometrical parameters of  $[\text{Fe}_2(\text{SCH}_2\text{Ph})_2(\text{CO})_{6-x}(\text{PMe}_3)_x]^{0/+}$  and  $[\text{Fe}_2(\text{adt})(\text{CO})_{6-x}(\text{PMe}_3)_x]^{0/+}$  ( $x = 0$  or  $4$ ). Selected distances in Å. For cationic forms, both rotated and unrotated isomers are presented, together with their relative in-solvent ( $\text{CH}_2\text{Cl}_2$ ) energies (in kcal/mol).

|                                              | $[\text{Fe}_2(\text{adt})(\text{CO})_6]^0$              | $[\text{Fe}_2(\text{adt})(\text{CO})_2(\text{PMe}_3)_4]^0$              | $[\text{Fe}_2(\text{SCH}_2\text{Ph})_2(\text{CO})_6]^0$              | $[\text{Fe}_2(\text{SCH}_2\text{Ph})_2(\text{CO})_2(\text{PMe}_3)_4]^0$              |
|----------------------------------------------|---------------------------------------------------------|-------------------------------------------------------------------------|----------------------------------------------------------------------|--------------------------------------------------------------------------------------|
| <b>Fe-Fe</b>                                 | 2.552                                                   | 2.661                                                                   | 2.546                                                                | 2.668                                                                                |
| <b>Fe-S<sub>avg</sub></b>                    | 2.295                                                   | 2.302                                                                   | 2.297                                                                | 2.307                                                                                |
| <b>S-C</b>                                   | 1.907 – 1.906                                           | 1.901 – 1.895                                                           | 1.892 – 1.885                                                        | 1.879 – 1.872                                                                        |
|                                              | $[\text{Fe}_2(\text{adt})(\text{CO})_6]^+$<br>rotated   | $[\text{Fe}_2(\text{adt})(\text{CO})_2(\text{PMe}_3)_4]^+$<br>rotated   | $[\text{Fe}_2(\text{SCH}_2\text{Ph})_2(\text{CO})_6]^+$<br>rotated   | $[\text{Fe}_2(\text{SCH}_2\text{Ph})_2(\text{CO})_2(\text{PMe}_3)_4]^+$<br>rotated   |
| <b>Fe-Fe</b>                                 | 2.617                                                   | 2.688                                                                   | 2.632                                                                | 2.657                                                                                |
| <b>Fe-S<sub>avg</sub></b>                    | 2.288                                                   | 2.305                                                                   | 2.287                                                                | 2.308                                                                                |
| <b>S-C</b>                                   | 1.971 – 1.961                                           | 1.920 – 1.915                                                           | 1.905 – 1.900                                                        | 1.884 – 1.877                                                                        |
|                                              | $[\text{Fe}_2(\text{adt})(\text{CO})_6]^+$<br>unrotated | $[\text{Fe}_2(\text{adt})(\text{CO})_2(\text{PMe}_3)_4]^+$<br>unrotated | $[\text{Fe}_2(\text{SCH}_2\text{Ph})_2(\text{CO})_6]^+$<br>unrotated | $[\text{Fe}_2(\text{SCH}_2\text{Ph})_2(\text{CO})_2(\text{PMe}_3)_4]^+$<br>unrotated |
| <b>Fe-Fe</b>                                 | 2.667                                                   | -                                                                       | 2.648                                                                | 2.834                                                                                |
| <b>Fe-S<sub>avg</sub></b>                    | 2.269                                                   | -                                                                       | 2.275                                                                | 2.301                                                                                |
| <b>S-C</b>                                   | 1.975 – 1.972                                           | -                                                                       | 1.922 – 1.902                                                        | 1.885 – 1.872                                                                        |
| <b><math>\Delta E</math><br/>(unrot-rot)</b> | -0.8                                                    | -                                                                       | -0.2                                                                 | +2.7                                                                                 |

Notes:

Both 4-substituted species ( $\text{Fe}_2(\text{adt})(\text{CO})_2(\text{PMe}_3)_4$  and  $\text{Fe}_2(\text{SCH}_2\text{Ph})_2(\text{CO})_2(\text{PMe}_3)_4$ ) feature  $\text{PMe}_3$  ligands in bis-(apical-basal) disposition.

In  $\text{Fe}_2(\text{SCH}_2\text{Ph})_2(\text{CO})_6$  and  $\text{Fe}_2(\text{SCH}_2\text{Ph})_2(\text{CO})_2(\text{PMe}_3)_4$  the two benzyl groups are in anti disposition.

Rotated isomer of cationic forms appears to be definitely stable only in substituted (with some donor L replacing CO) derivatives.

Indeed, rotated  $[\text{Fe}_2(\text{SCH}_2\text{Ph})_2(\text{CO})_2(\text{PMe}_3)_4]^+$  is ca 3 kcal/mol more stable than the unrotated isomer and unrotated

$[\text{Fe}_2(\text{adt})(\text{CO})_2(\text{PMe}_3)_4]^+$  has not even been found as stable structure at the BP86/TZVP level.

In contrast, in all-CO  $\text{H}_{\text{ox}}$ -like species, rotated and unrotated isomers are predicted to be nearly isoenergetic (independently of the nature of  $(\text{SR})_2$ ).

## IV. DFT Results vs Level of Theory

**Table S3.** Calculated redox potentials for the couple  $[3]^{+/0}$  referred to the  $\text{Fc}/\text{Fc}^+$  couple (V).

|             | Exp   | BP86,                    | BP86,                    | BP86-D3                  | BP86-D3                  | B3LYP                    | B3LYP                    |
|-------------|-------|--------------------------|--------------------------|--------------------------|--------------------------|--------------------------|--------------------------|
|             |       | $\Delta E_{\text{solv}}$ | $\Delta G_{\text{solv}}$ | $\Delta E_{\text{solv}}$ | $\Delta G_{\text{solv}}$ | $\Delta E_{\text{solv}}$ | $\Delta G_{\text{solv}}$ |
| $[3]^{+/0}$ | -0.81 | -0.800                   | -0.727                   | -0.853                   | -0.785                   | -1.299                   | -1.231                   |

**Table S4.** Calculated S-C homolysis energies at various levels of theory.

| Complex                                                                 | BP86                                                    |                                             | BP86-D3                                    |                                             | B97-D                                      |                                             | M06-L                                      |                                             |
|-------------------------------------------------------------------------|---------------------------------------------------------|---------------------------------------------|--------------------------------------------|---------------------------------------------|--------------------------------------------|---------------------------------------------|--------------------------------------------|---------------------------------------------|
|                                                                         | $\text{Fe}^{\text{I}}\text{Fe}^{\text{I}}$              | $\text{Fe}^{\text{II}}\text{Fe}^{\text{I}}$ | $\text{Fe}^{\text{I}}\text{Fe}^{\text{I}}$ | $\text{Fe}^{\text{II}}\text{Fe}^{\text{I}}$ | $\text{Fe}^{\text{I}}\text{Fe}^{\text{I}}$ | $\text{Fe}^{\text{II}}\text{Fe}^{\text{I}}$ | $\text{Fe}^{\text{I}}\text{Fe}^{\text{I}}$ | $\text{Fe}^{\text{II}}\text{Fe}^{\text{I}}$ |
|                                                                         | $[\text{Fe}_2(\text{SCH}_2\text{Ph})_2(\text{CO})_6]^z$ | 23.7                                        | 7.4                                        | 35.4                                        | 18.1                                       | 29.6                                        | 11.0                                       | 25.1                                        |
| $[\text{Fe}_2(\text{SCH}_2\text{Ph})_2(\text{CO})_4(\text{PMe}_3)_2]^z$ | 13.7                                                    | 2.7                                         | 30.2                                       | 10.7                                        | 22.2                                       | 6.7                                         | 23.1                                       | 13.8                                        |
| $[\text{Fe}_2(\text{SCH}_2\text{Ph})_2(\text{CO})_2(\text{PMe}_3)_4]^z$ | 5.2                                                     | -2.5                                        | 18.8                                       | 8.8                                         | 14.3                                       | -1.9                                        | 12.9                                       | 9.0                                         |
| $[\text{Fe}_2(\text{SCH}_2\text{Ph})_2(\text{CO})_2(\text{dppv})_2]^z$  | 1.2                                                     | -8.9                                        | 22.1                                       | 8.3                                         | 16.0                                       | -2.0                                        | 10.5                                       | 3.4                                         |

## V. XYZ Coordinates of DFT-Optimized Geometries (Gas Phase) BP86/TZVP

**Fe<sub>2</sub>(SBn)<sub>2</sub>(CO)<sub>2</sub>(dppv)<sub>2</sub>**

|    |           |            |           |
|----|-----------|------------|-----------|
| C  | -1.241778 | -4.519625  | 2.861659  |
| C  | -0.168220 | -5.122903  | 2.188128  |
| C  | 0.309399  | -6.365261  | 2.641759  |
| C  | -0.276950 | -6.985254  | 3.748390  |
| C  | -1.348724 | -6.379954  | 4.411828  |
| C  | -1.830474 | -5.146744  | 3.965274  |
| P  | 0.697249  | -4.296824  | 0.750278  |
| C  | 0.050320  | -2.546048  | 0.883338  |
| C  | 0.625656  | -1.589073  | 1.737570  |
| C  | 0.117393  | -0.287878  | 1.794405  |
| C  | -0.977241 | 0.074474   | 1.003896  |
| C  | -1.559352 | -0.871538  | 0.156100  |
| C  | -1.046017 | -2.170217  | 0.091749  |
| Fe | 1.004915  | -5.157585  | -1.306102 |
| S  | 0.989945  | -6.222811  | -3.328871 |
| C  | 1.056024  | -5.042901  | -4.818342 |
| C  | 1.843984  | -5.637435  | -5.949354 |
| C  | 1.196480  | -6.213654  | -7.054715 |
| C  | 1.930803  | -6.759840  | -8.111433 |
| C  | 3.328278  | -6.741151  | -8.080850 |
| C  | 3.986322  | -6.163229  | -6.988941 |
| C  | 3.250602  | -5.614128  | -5.936371 |
| Fe | -1.074882 | -6.426007  | -2.363677 |
| P  | -1.838978 | -7.953574  | -3.793693 |
| C  | -1.103439 | -9.664731  | -3.812599 |
| C  | -1.791274 | -10.764972 | -3.271923 |
| C  | -1.191233 | -12.027471 | -3.222340 |
| C  | 0.102255  | -12.210669 | -3.717626 |
| C  | 0.796466  | -11.120828 | -4.255396 |
| C  | 0.205431  | -9.855602  | -4.294388 |
| C  | -3.616712 | -8.311471  | -3.415946 |
| C  | -4.139857 | -7.723192  | -2.336837 |
| P  | -3.011472 | -6.715821  | -1.249715 |
| C  | -3.246023 | -7.794327  | 0.270131  |
| C  | -4.108197 | -7.476156  | 1.329894  |
| C  | -4.328367 | -8.390804  | 2.365931  |

|   |           |            |           |
|---|-----------|------------|-----------|
| C | -3.700173 | -9.637600  | 2.351615  |
| C | -2.848188 | -9.966362  | 1.292701  |
| C | -2.617401 | -9.050895  | 0.263845  |
| C | -2.051554 | -7.599330  | -5.626475 |
| C | -2.612173 | -6.362033  | -5.989961 |
| C | -2.885633 | -6.069548  | -7.328893 |
| C | -2.603405 | -7.007672  | -8.326844 |
| C | -2.048941 | -8.241375  | -7.974644 |
| C | -1.774853 | -8.536803  | -6.634388 |
| C | -4.111284 | -5.256837  | -0.893491 |
| C | -5.154672 | -4.907096  | -1.765112 |
| C | -5.942005 | -3.778339  | -1.516603 |
| C | -5.696540 | -2.984417  | -0.393447 |
| C | -4.648298 | -3.316024  | 0.471130  |
| C | -3.854715 | -4.437415  | 0.217791  |
| S | 0.223939  | -7.225599  | -0.640136 |
| C | 1.314024  | -8.745396  | -1.018443 |
| C | 1.793656  | -9.381755  | 0.253319  |
| C | 0.964712  | -10.264205 | 0.969349  |
| C | 1.391789  | -10.853678 | 2.160314  |
| C | 2.666201  | -10.573771 | 2.666254  |
| C | 3.503616  | -9.701158  | 1.965061  |
| C | 3.071464  | -9.112935  | 0.772443  |
| P | 3.200933  | -4.932320  | -0.947285 |
| C | 4.105393  | -3.535803  | -1.817813 |
| C | 3.720270  | -2.210929  | -1.547241 |
| C | 4.345296  | -1.142914  | -2.194758 |
| C | 5.358579  | -1.378985  | -3.129406 |
| C | 5.746448  | -2.691983  | -3.406445 |
| C | 5.128238  | -3.763171  | -2.752375 |
| C | 0.785062  | -3.591287  | -2.042063 |
| O | 0.653943  | -2.556819  | -2.577413 |
| C | 2.374788  | -4.117588  | 1.536779  |
| C | 3.459835  | -4.398485  | 0.808496  |
| C | 4.466657  | -6.293978  | -1.155990 |
| C | 5.515295  | -6.511676  | -0.245417 |
| C | 6.456374  | -7.521102  | -0.470101 |
| C | 6.371334  | -8.324454  | -1.611459 |
| C | 5.334037  | -8.115068  | -2.524480 |



|   |           |            |           |
|---|-----------|------------|-----------|
| C | 4.385738  | -7.111791  | -2.296798 |
| H | 0.667449  | -9.427993  | -1.582129 |
| H | 2.142196  | -8.434683  | -1.663842 |
| H | 3.736248  | -8.439677  | 0.231210  |
| H | 4.504136  | -9.480933  | 2.343057  |
| H | 3.003050  | -11.034330 | 3.596844  |
| H | 0.729341  | -11.537619 | 2.695061  |
| H | -0.031446 | -10.485605 | 0.584360  |
| H | 1.513370  | -4.113997  | -4.461093 |
| H | 0.022557  | -4.832855  | -5.113134 |
| H | 3.768754  | -5.145054  | -5.096204 |
| H | 5.077377  | -6.132775  | -6.963559 |
| H | 3.901851  | -7.163684  | -8.907861 |
| H | 1.407104  | -7.196955  | -8.963910 |
| H | 0.105580  | -6.226407  | -7.089447 |
| H | -4.200640 | -8.954407  | -4.081707 |
| H | 2.450807  | -3.799563  | 2.580900  |
| H | 4.466644  | -4.264327  | 1.213519  |
| H | -5.179618 | -7.870530  | -2.028579 |
| H | 2.923936  | -2.006404  | -0.829889 |
| H | 4.031546  | -0.121778  | -1.971424 |
| H | 5.842353  | -0.543754  | -3.638899 |
| H | 6.538709  | -2.889232  | -4.131079 |
| H | 5.458394  | -4.780537  | -2.964647 |
| H | 5.608546  | -5.901024  | 0.651614  |
| H | 7.258126  | -7.678650  | 0.253604  |
| H | 7.106435  | -9.111853  | -1.784999 |
| H | 5.251906  | -8.739247  | -3.415783 |
| H | 3.567976  | -6.967522  | -3.006137 |
| H | 1.479413  | -1.848445  | 2.363793  |
| H | 0.581961  | 0.444557   | 2.457535  |
| H | -1.369808 | 1.092470   | 1.043767  |
| H | -2.407560 | -0.599557  | -0.474160 |
| H | -1.492213 | -2.892620  | -0.593405 |
| H | 1.139814  | -6.851867  | 2.130803  |
| H | 0.106017  | -7.949025  | 4.086685  |
| H | -1.803863 | -6.866031  | 5.276703  |
| H | -2.662689 | -4.662636  | 4.479911  |
| H | -1.606282 | -3.543760  | 2.538970  |

|   |           |            |           |
|---|-----------|------------|-----------|
| H | -5.351534 | -5.512360  | -2.651218 |
| H | -6.749503 | -3.521137  | -2.204671 |
| H | -6.314273 | -2.107096  | -0.194843 |
| H | -4.441156 | -2.694351  | 1.343681  |
| H | -3.035775 | -4.681234  | 0.897040  |
| H | -4.622292 | -6.516281  | 1.349805  |
| H | -5.002979 | -8.124790  | 3.182228  |
| H | -3.875698 | -10.352855 | 3.157280  |
| H | -2.360833 | -10.942615 | 1.268529  |
| H | -1.952085 | -9.316277  | -0.559185 |
| H | -2.803057 | -10.638574 | -2.882318 |
| H | -1.740448 | -12.869746 | -2.796430 |
| H | 0.569427  | -13.196189 | -3.679005 |
| H | 1.810893  | -11.253900 | -4.635945 |
| H | 0.768817  | -9.007877  | -4.689682 |
| H | -1.344164 | -9.505014  | -6.378567 |
| H | -1.828869 | -8.983307  | -8.745257 |
| H | -2.818026 | -6.778302  | -9.372169 |
| H | -3.319472 | -5.102850  | -7.590805 |
| H | -2.841759 | -5.620844  | -5.224766 |
| C | -1.732750 | -4.960462  | -3.041865 |
| O | -2.176771 | -3.961300  | -3.475352 |

**[Fe<sub>2</sub>(SBn)<sub>2</sub>(CO)<sub>2</sub>(dppv)<sub>2</sub>]<sup>+</sup>**

|    |           |           |           |
|----|-----------|-----------|-----------|
| C  | -1.237885 | -4.648750 | 2.807746  |
| C  | 0.006637  | -5.140962 | 2.374889  |
| C  | 0.643690  | -6.122543 | 3.150183  |
| C  | 0.051772  | -6.602426 | 4.323264  |
| C  | -1.184729 | -6.105012 | 4.742616  |
| C  | -1.828855 | -5.124332 | 3.978971  |
| C  | 0.622129  | -4.641018 | 1.096315  |
| S  | 1.174650  | -2.840681 | 1.289876  |
| Fe | 3.418654  | -2.303664 | 1.328308  |
| C  | 4.857188  | -1.374193 | 0.955406  |
| O  | 5.789930  | -0.744943 | 0.648357  |
| S  | 3.456248  | -3.424001 | -0.646085 |
| Fe | 1.775308  | -1.883993 | -0.742862 |
| P  | 2.059141  | -1.263232 | -2.911132 |
| C  | 3.607026  | -0.468776 | -3.566837 |

|   |           |           |           |
|---|-----------|-----------|-----------|
| C | 5.126872  | -3.179225 | -1.511812 |
| C | 5.425666  | -4.190002 | -2.583343 |
| C | 5.714980  | -3.765168 | -3.889840 |
| C | 6.069390  | -4.686478 | -4.880045 |
| C | 6.137190  | -6.049548 | -4.579835 |
| C | 5.851111  | -6.485880 | -3.280785 |
| C | 5.503261  | -5.563551 | -2.292209 |
| P | -0.361219 | -1.212235 | -1.108420 |
| C | -1.549550 | -2.456468 | -1.812888 |
| C | 2.219563  | -0.309634 | -0.078888 |
| O | 2.352098  | 0.826240  | 0.197891  |
| C | -1.359820 | -0.316756 | 0.163913  |
| C | -0.288511 | 0.050701  | -2.461232 |
| P | 4.513712  | -3.817016 | 2.593454  |
| C | 6.373555  | -3.694219 | 2.590071  |
| P | 3.092227  | -1.129157 | 3.285878  |
| C | 4.234163  | 0.290503  | 3.684853  |
| C | 4.104845  | -3.466062 | 4.356880  |
| C | 4.304525  | -5.670598 | 2.487193  |
| C | 1.460675  | -0.493601 | 3.917143  |
| C | 3.487018  | -2.317704 | 4.646373  |
| C | 1.629670  | -2.541672 | -4.198084 |
| C | 0.789282  | 0.037973  | -3.250905 |
| H | -0.120949 | -4.617598 | 0.289089  |
| H | 1.472854  | -5.253342 | 0.780389  |
| H | 1.604722  | -6.523384 | 2.825107  |
| H | 0.558367  | -7.372639 | 4.906554  |
| H | -1.648556 | -6.483299 | 5.654989  |
| H | -2.800270 | -4.737982 | 4.292866  |
| H | -1.744220 | -3.881757 | 2.219018  |
| H | 5.848626  | -3.264185 | -0.688689 |
| H | 5.168766  | -2.157159 | -1.902160 |
| H | 5.298492  | -5.912636 | -1.277856 |
| H | 5.913865  | -7.547355 | -3.034759 |
| H | 6.418321  | -6.768433 | -5.350975 |
| H | 6.297215  | -4.336434 | -5.887963 |
| H | 5.667987  | -2.701531 | -4.130673 |
| H | 0.923179  | 0.727896  | -4.088155 |
| H | 3.207534  | -2.057098 | 5.671172  |

|   |           |           |           |
|---|-----------|-----------|-----------|
| H | 4.382216  | -4.174740 | 5.140441  |
| H | -1.124671 | 0.740758  | -2.605910 |
| C | 7.003577  | -2.620519 | 3.241445  |
| C | 8.394343  | -2.495737 | 3.206890  |
| C | 9.169505  | -3.430853 | 2.514385  |
| C | 8.547362  | -4.493807 | 1.854186  |
| C | 7.156339  | -4.629487 | 1.893481  |
| H | 6.413530  | -1.875447 | 3.777818  |
| H | 8.872468  | -1.661995 | 3.723494  |
| H | 10.255690 | -3.331572 | 2.490325  |
| H | 9.144377  | -5.229130 | 1.312248  |
| H | 6.687348  | -5.478461 | 1.394460  |
| C | 4.647989  | -6.483120 | 3.583647  |
| C | 4.551730  | -7.873584 | 3.494156  |
| C | 4.125310  | -8.477173 | 2.306194  |
| C | 3.801331  | -7.679879 | 1.206914  |
| C | 3.887985  | -6.285503 | 1.297732  |
| H | 5.014478  | -6.045606 | 4.512137  |
| H | 4.818671  | -8.487137 | 4.356027  |
| H | 4.053666  | -9.563529 | 2.238919  |
| H | 3.474124  | -8.139205 | 0.272797  |
| H | 3.632697  | -5.667497 | 0.435548  |
| C | 4.898294  | 0.372704  | 4.921079  |
| C | 5.723744  | 1.462572  | 5.211489  |
| C | 5.890183  | 2.487837  | 4.276745  |
| C | 5.228565  | 2.416197  | 3.048112  |
| C | 4.409341  | 1.323747  | 2.749540  |
| H | 4.781444  | -0.412036 | 5.668227  |
| H | 6.234615  | 1.508697  | 6.174661  |
| H | 6.531708  | 3.340049  | 4.505666  |
| H | 5.351613  | 3.212079  | 2.311879  |
| H | 3.903031  | 1.284144  | 1.785600  |
| C | 0.517443  | -1.415383 | 4.404208  |
| C | -0.662124 | -0.962644 | 4.998430  |
| C | -0.917724 | 0.407978  | 5.100273  |
| C | 0.004920  | 1.326084  | 4.592749  |
| C | 1.190445  | 0.880077  | 4.002079  |
| H | 0.704719  | -2.488027 | 4.334163  |
| H | -1.378719 | -1.687334 | 5.387637  |

|   |           |           |           |
|---|-----------|-----------|-----------|
| H | -1.833323 | 0.760227  | 5.577392  |
| H | -0.188193 | 2.397654  | 4.667842  |
| H | 1.914971  | 1.607285  | 3.635679  |
| C | -1.149593 | 1.059168  | 0.354796  |
| C | -1.947947 | 1.771993  | 1.253100  |
| C | -2.952411 | 1.118914  | 1.972576  |
| C | -3.145417 | -0.255749 | 1.806939  |
| C | -2.350605 | -0.973247 | 0.909916  |
| H | -0.368879 | 1.580846  | -0.200862 |
| H | -1.787141 | 2.842850  | 1.384707  |
| H | -3.583624 | 1.680702  | 2.662391  |
| H | -3.925300 | -0.771825 | 2.368763  |
| H | -2.527361 | -2.039429 | 0.765809  |
| C | -2.879029 | -2.110851 | -2.115666 |
| C | -3.728562 | -3.047726 | -2.707689 |
| C | -3.261283 | -4.333656 | -3.003975 |
| C | -1.938552 | -4.678243 | -2.715496 |
| C | -1.083778 | -3.741487 | -2.125388 |
| H | -3.257209 | -1.114687 | -1.880673 |
| H | -4.759042 | -2.772552 | -2.938374 |
| H | -3.928965 | -5.063722 | -3.463927 |
| H | -1.566932 | -5.676214 | -2.952127 |
| H | -0.043469 | -4.003751 | -1.922838 |
| C | 0.759422  | -2.244884 | -5.261799 |
| C | 0.447873  | -3.219846 | -6.213757 |
| C | 0.995994  | -4.501488 | -6.113207 |
| C | 1.855293  | -4.805789 | -5.053498 |
| C | 2.165613  | -3.835325 | -4.097141 |
| H | 0.312137  | -1.255379 | -5.351266 |
| H | -0.229025 | -2.974997 | -7.034027 |
| H | 0.751056  | -5.261105 | -6.857138 |
| H | 2.287981  | -5.803368 | -4.964476 |
| H | 2.828955  | -4.093761 | -3.272169 |
| C | 3.929907  | -0.544782 | -4.931970 |
| C | 5.048612  | 0.131945  | -5.427272 |
| C | 5.857735  | 0.880205  | -4.566585 |
| C | 5.543560  | 0.953348  | -3.206631 |
| C | 4.423879  | 0.282290  | -2.706558 |
| H | 3.312113  | -1.135468 | -5.609669 |

|   |          |          |           |
|---|----------|----------|-----------|
| H | 5.289521 | 0.069493 | -6.489760 |
| H | 6.731902 | 1.404224 | -4.955679 |
| H | 6.172186 | 1.530433 | -2.527077 |
| H | 4.191499 | 0.347779 | -1.644687 |

**Fe<sub>2</sub>(SBn)(S)(CO)<sub>2</sub>(dppv)<sub>2</sub>**

|    |           |            |           |
|----|-----------|------------|-----------|
| C  | 0.041262  | -6.611311  | 3.354852  |
| C  | 0.858128  | -6.710581  | 2.219372  |
| C  | 1.733389  | -7.803479  | 2.099382  |
| C  | 1.785289  | -8.779653  | 3.096424  |
| C  | 0.964687  | -8.678224  | 4.224662  |
| C  | 0.095559  | -7.591844  | 4.352165  |
| P  | 0.928422  | -5.376855  | 0.909357  |
| C  | -0.327997 | -4.146088  | 1.514597  |
| C  | 0.026697  | -2.946333  | 2.150876  |
| C  | -0.958232 | -2.034141  | 2.544031  |
| C  | -2.306744 | -2.311830  | 2.307252  |
| C  | -2.666610 | -3.501606  | 1.665881  |
| C  | -1.684893 | -4.409649  | 1.263975  |
| Fe | 1.088596  | -5.737730  | -1.299729 |
| S  | 1.139561  | -6.347327  | -3.490082 |
| C  | 0.918467  | -4.859770  | -4.625971 |
| C  | 1.401380  | -5.122723  | -6.029761 |
| C  | 0.628042  | -4.723199  | -7.131207 |
| C  | 1.094522  | -4.894121  | -8.438227 |
| C  | 2.342076  | -5.479561  | -8.669829 |
| C  | 3.118621  | -5.892862  | -7.581816 |
| C  | 2.653621  | -5.713985  | -6.276854 |
| Fe | -0.763652 | -7.236784  | -2.566928 |
| C  | -1.850081 | -5.873572  | -2.340195 |
| O  | -2.616224 | -5.004382  | -2.135442 |
| P  | -1.635292 | -7.995858  | -4.480260 |
| C  | -0.733790 | -9.372634  | -5.350908 |
| C  | -1.261831 | -10.671577 | -5.433568 |
| C  | -0.538442 | -11.693374 | -6.056964 |
| C  | 0.719235  | -11.430500 | -6.605956 |
| C  | 1.255220  | -10.140647 | -6.520353 |
| C  | 0.539988  | -9.119573  | -5.891449 |
| C  | -3.270654 | -8.778876  | -4.084744 |

|   |           |            |           |
|---|-----------|------------|-----------|
| C | -3.530995 | -9.023149  | -2.796320 |
| P | -2.165693 | -8.651655  | -1.590295 |
| C | -1.703860 | -10.419507 | -1.190811 |
| C | -2.576057 | -11.243123 | -0.458245 |
| C | -2.274906 | -12.593837 | -0.263583 |
| C | -1.102506 | -13.136032 | -0.800446 |
| C | -0.235720 | -12.322175 | -1.534938 |
| C | -0.534000 | -10.970435 | -1.733130 |
| C | -2.172417 | -6.904539  | -5.902879 |
| C | -2.808459 | -5.685034  | -5.615196 |
| C | -3.318494 | -4.891898  | -6.647579 |
| C | -3.199098 | -5.304714  | -7.978532 |
| C | -2.567704 | -6.516788  | -8.270943 |
| C | -2.057528 | -7.313093  | -7.240909 |
| C | -3.104298 | -8.130821  | -0.079057 |
| C | -4.315052 | -7.430881  | -0.210636 |
| C | -5.018672 | -7.016578  | 0.924196  |
| C | -4.514934 | -7.288871  | 2.199918  |
| C | -3.297461 | -7.964000  | 2.335465  |
| C | -2.589494 | -8.377802  | 1.204101  |
| S | 0.775301  | -7.961833  | -1.107444 |
| P | 3.225519  | -5.216749  | -1.124518 |
| C | 3.872046  | -3.809713  | -2.157684 |
| C | 3.578728  | -2.485803  | -1.789106 |
| C | 3.990867  | -1.418950  | -2.591756 |
| C | 4.688712  | -1.660527  | -3.779321 |
| C | 4.975693  | -2.975469  | -4.158037 |
| C | 4.572505  | -4.043966  | -3.351955 |
| C | 0.551686  | -4.084894  | -1.596500 |
| O | 0.174297  | -2.996692  | -1.804974 |
| C | 2.537857  | -4.626664  | 1.462621  |
| C | 3.547847  | -4.581248  | 0.587267  |
| C | 4.597318  | -6.471188  | -1.303853 |
| C | 5.936095  | -6.109599  | -1.065319 |
| C | 6.952484  | -7.061781  | -1.164249 |
| C | 6.644231  | -8.383165  | -1.508619 |
| C | 5.317603  | -8.744530  | -1.754329 |
| C | 4.294718  | -7.794271  | -1.650828 |
| H | 1.515274  | -4.060533  | -4.164792 |

|   |           |            |           |
|---|-----------|------------|-----------|
| H | -0.132647 | -4.549965  | -4.615602 |
| H | 3.260948  | -6.045739  | -5.433075 |
| H | 4.093888  | -6.354510  | -7.750331 |
| H | 2.706474  | -5.615783  | -9.689718 |
| H | 0.475347  | -4.573006  | -9.277936 |
| H | -0.351688 | -4.272016  | -6.961291 |
| H | -3.971776 | -9.013881  | -4.891191 |
| H | 2.661965  | -4.325613  | 2.507537  |
| H | 4.541996  | -4.214287  | 0.859932  |
| H | -4.456087 | -9.499081  | -2.457202 |
| H | 3.021025  | -2.285900  | -0.872573 |
| H | 3.758843  | -0.395975  | -2.290108 |
| H | 5.004637  | -0.827296  | -4.409332 |
| H | 5.515013  | -3.173237  | -5.086011 |
| H | 4.815866  | -5.065289  | -3.647738 |
| H | 6.191017  | -5.077616  | -0.816569 |
| H | 7.987515  | -6.771116  | -0.974118 |
| H | 7.439641  | -9.126857  | -1.586898 |
| H | 5.070524  | -9.772225  | -2.027314 |
| H | 3.253566  | -8.076359  | -1.830160 |
| H | 1.074993  | -2.708606  | 2.334778  |
| H | -0.667022 | -1.102461  | 3.032853  |
| H | -3.074573 | -1.598086  | 2.611303  |
| H | -3.715245 | -3.721275  | 1.460423  |
| H | -1.976883 | -5.322391  | 0.742370  |
| H | 2.370605  | -7.894505  | 1.219517  |
| H | 2.467024  | -9.625079  | 2.987594  |
| H | 1.007200  | -9.441783  | 5.003748  |
| H | -0.541703 | -7.499590  | 5.234184  |
| H | -0.640222 | -5.767020  | 3.465189  |
| H | -4.711144 | -7.204339  | -1.202287 |
| H | -5.962857 | -6.480993  | 0.808912  |
| H | -5.066346 | -6.969995  | 3.086249  |
| H | -2.889406 | -8.167884  | 3.326360  |
| H | -1.636863 | -8.897521  | 1.317809  |
| H | -3.488365 | -10.828576 | -0.026208 |
| H | -2.957832 | -13.222578 | 0.311146  |
| H | -0.866606 | -14.190671 | -0.646067 |
| H | 0.682311  | -12.736887 | -1.954959 |



|   |           |            |           |
|---|-----------|------------|-----------|
| H | 0.147814  | -10.330823 | -2.294808 |
| H | -2.238881 | -10.894244 | -5.002154 |
| H | -0.963417 | -12.697456 | -6.112390 |
| H | 1.282240  | -12.227704 | -7.094703 |
| H | 2.239852  | -9.925971  | -6.939480 |
| H | 0.978380  | -8.122615  | -5.817532 |
| H | -1.564715 | -8.254720  | -7.483426 |
| H | -2.466533 | -6.847599  | -9.306340 |
| H | -3.597105 | -4.684333  | -8.783667 |
| H | -3.809552 | -3.947169  | -6.406845 |
| H | -2.911873 | -5.350565  | -4.583210 |

**[Fe<sub>2</sub>(SBn)(S)(CO)<sub>2</sub>(dppv)<sub>2</sub>]<sup>+</sup>**

|    |           |           |           |
|----|-----------|-----------|-----------|
| C  | 4.165406  | -7.798196 | -1.673017 |
| C  | 4.526020  | -6.480615 | -1.363510 |
| C  | 5.884394  | -6.157153 | -1.184785 |
| C  | 6.862290  | -7.145380 | -1.310386 |
| C  | 6.496725  | -8.460626 | -1.618415 |
| C  | 5.150373  | -8.783357 | -1.802450 |
| P  | 3.231844  | -5.165155 | -1.147979 |
| C  | 3.615398  | -4.501326 | 0.534108  |
| C  | 2.662895  | -4.563228 | 1.470169  |
| P  | 1.057047  | -5.366495 | 1.030310  |
| Fe | 1.100488  | -5.743251 | -1.200258 |
| C  | 0.562580  | -4.081867 | -1.467691 |
| O  | 0.133761  | -3.017156 | -1.665052 |
| C  | 1.061776  | -6.726147 | 2.300475  |
| C  | 0.223323  | -6.699186 | 3.424407  |
| C  | 0.321888  | -7.701501 | 4.395693  |
| C  | 1.255135  | -8.731145 | 4.253359  |
| C  | 2.096502  | -8.757851 | 3.135931  |
| C  | 2.001108  | -7.762187 | 2.162574  |
| C  | -0.230987 | -4.180786 | 1.627244  |
| C  | 0.098780  | -2.955101 | 2.226667  |
| C  | -0.910446 | -2.069415 | 2.616922  |
| C  | -2.252554 | -2.398898 | 2.411946  |
| C  | -2.585792 | -3.616504 | 1.809698  |
| C  | -1.582080 | -4.501316 | 1.410920  |
| S  | 1.095257  | -6.342356 | -3.392808 |

|    |           |            |           |
|----|-----------|------------|-----------|
| Fe | -0.806597 | -7.263780  | -2.535959 |
| S  | 0.530148  | -7.837228  | -0.904645 |
| C  | 0.932403  | -4.868307  | -4.545116 |
| C  | 1.449924  | -5.141350  | -5.936675 |
| C  | 0.772391  | -4.601939  | -7.041311 |
| C  | 1.277187  | -4.754845  | -8.335588 |
| C  | 2.463645  | -5.461824  | -8.549535 |
| C  | 3.141612  | -6.014482  | -7.458334 |
| C  | 2.640949  | -5.851926  | -6.163784 |
| C  | -1.917546 | -5.931172  | -2.412610 |
| O  | -2.634433 | -5.026452  | -2.221672 |
| P  | -1.645122 | -7.954595  | -4.509182 |
| C  | -2.074295 | -6.842193  | -5.936222 |
| C  | -2.764448 | -5.643521  | -5.685574 |
| C  | -3.219831 | -4.858379  | -6.748199 |
| C  | -2.991410 | -5.259639  | -8.068286 |
| C  | -2.305248 | -6.449939  | -8.321661 |
| C  | -1.847170 | -7.239790  | -7.263140 |
| P  | -2.307523 | -8.679996  | -1.623953 |
| C  | -3.268858 | -8.118021  | -0.150763 |
| C  | -4.476370 | -7.421227  | -0.319788 |
| C  | -5.202518 | -6.994202  | 0.795988  |
| C  | -4.723866 | -7.250423  | 2.084172  |
| C  | -3.510046 | -7.924833  | 2.255367  |
| C  | -2.779047 | -8.353486  | 1.144872  |
| C  | -0.703306 | -9.353327  | -5.282306 |
| C  | -1.252037 | -10.643914 | -5.360869 |
| C  | -0.521586 | -11.685092 | -5.941503 |
| C  | 0.760484  | -11.449366 | -6.443366 |
| C  | 1.313629  | -10.166747 | -6.362047 |
| C  | 0.591350  | -9.123609  | -5.779574 |
| C  | -3.301236 | -8.702384  | -4.166772 |
| C  | -3.612741 | -8.982567  | -2.897782 |
| C  | -1.847166 | -10.433529 | -1.212917 |
| C  | -2.764336 | -11.254168 | -0.532542 |
| C  | -2.472350 | -12.602978 | -0.318485 |
| C  | -1.268246 | -13.143360 | -0.782136 |
| C  | -0.357475 | -12.331232 | -1.462798 |
| C  | -0.644748 | -10.980671 | -1.682594 |

|   |           |           |           |
|---|-----------|-----------|-----------|
| C | 3.815969  | -3.794822 | -2.249540 |
| C | 3.522321  | -2.463597 | -1.906612 |
| C | 3.913363  | -1.418188 | -2.746393 |
| C | 4.589978  | -1.691362 | -3.939529 |
| C | 4.880454  | -3.013632 | -4.287684 |
| C | 4.498332  | -4.062883 | -3.446920 |
| H | 1.526127  | -4.076227 | -4.066399 |
| H | -0.114287 | -4.544941 | -4.566663 |
| H | 3.177133  | -6.286854 | -5.318188 |
| H | 4.069013  | -6.568391 | -7.615149 |
| H | 2.858024  | -5.581932 | -9.559709 |
| H | 0.738626  | -4.321484 | -9.179934 |
| H | -0.157622 | -4.051377 | -6.885341 |
| H | -3.975843 | -8.900399 | -5.004614 |
| H | 2.838200  | -4.243775 | 2.501561  |
| H | 4.612073  | -4.098974 | 0.736420  |
| H | -4.558311 | -9.451316 | -2.610112 |
| H | 2.989548  | -2.238124 | -0.981088 |
| H | 3.686657  | -0.388075 | -2.467730 |
| H | 4.891708  | -0.874180 | -4.596277 |
| H | 5.407972  | -3.232349 | -5.217046 |
| H | 4.747118  | -5.089409 | -3.717701 |
| H | 6.185982  | -5.132226 | -0.962512 |
| H | 7.912787  | -6.887007 | -1.168251 |
| H | 7.263243  | -9.231006 | -1.716425 |
| H | 4.860652  | -9.806472 | -2.047160 |
| H | 3.112252  | -8.050392 | -1.810694 |
| H | 1.140934  | -2.677185 | 2.386681  |
| H | -0.643463 | -1.118135 | 3.079885  |
| H | -3.037785 | -1.704474 | 2.714366  |
| H | -3.630680 | -3.876835 | 1.636600  |
| H | -1.853491 | -5.442374 | 0.929090  |
| H | 2.661793  | -7.792256 | 1.294739  |
| H | 2.830525  | -9.556803 | 3.020802  |
| H | 1.332812  | -9.508843 | 5.014676  |
| H | -0.328621 | -7.668932 | 5.271452  |
| H | -0.501581 | -5.894147 | 3.549823  |
| H | -4.859153 | -7.213387 | -1.320675 |
| H | -6.146946 | -6.465917 | 0.655801  |

|   |           |            |           |
|---|-----------|------------|-----------|
| H | -5.296611 | -6.926414  | 2.954405  |
| H | -3.129856 | -8.123658  | 3.258154  |
| H | -1.835493 | -8.882642  | 1.286966  |
| H | -3.701501 | -10.840549 | -0.157008 |
| H | -3.187607 | -13.231875 | 0.213957  |
| H | -1.041313 | -14.196946 | -0.611660 |
| H | 0.583734  | -12.747395 | -1.825052 |
| H | 0.069817  | -10.348104 | -2.209498 |
| H | -2.249339 | -10.845305 | -4.968161 |
| H | -0.960381 | -12.682333 | -6.001079 |
| H | 1.328261  | -12.263044 | -6.897312 |
| H | 2.314429  | -9.974942  | -6.751920 |
| H | 1.037972  | -8.129533  | -5.719643 |
| H | -1.315914 | -8.167014  | -7.475690 |
| H | -2.123074 | -6.771132  | -9.348227 |
| H | -3.351029 | -4.647276  | -8.896643 |
| H | -3.759234 | -3.932831  | -6.540568 |
| H | -2.965420 | -5.319233  | -4.665271 |

**Fe<sub>2</sub>(SBn)<sub>2</sub>(CO)<sub>2</sub>(PMe<sub>3</sub>)<sub>4</sub>**

|    |          |           |           |
|----|----------|-----------|-----------|
| C  | 6.025117 | -2.909864 | -4.286412 |
| C  | 5.111377 | -3.522128 | -3.425573 |
| C  | 4.296937 | -2.756679 | -2.570731 |
| C  | 4.425685 | -1.358427 | -2.612835 |
| C  | 5.336652 | -0.741181 | -3.477147 |
| C  | 6.143666 | -1.515551 | -4.314816 |
| C  | 3.293302 | -3.404557 | -1.650736 |
| S  | 4.055746 | -4.791387 | -0.633082 |
| Fe | 2.579646 | -6.236625 | 0.361444  |
| P  | 2.106806 | -7.411627 | -1.482126 |
| Fe | 4.258386 | -4.622924 | 1.673700  |
| P  | 2.914419 | -2.943275 | 2.316772  |
| C  | 4.405355 | -4.961630 | 3.361848  |
| O  | 4.568479 | -5.188872 | 4.508561  |
| P  | 6.230747 | -3.564749 | 1.539004  |
| S  | 4.552263 | -6.895154 | 1.349130  |
| P  | 1.605016 | -7.590609 | 1.859163  |
| C  | 1.182864 | -5.223593 | 0.265738  |
| O  | 0.224305 | -4.532002 | 0.195154  |

|   |           |           |           |
|---|-----------|-----------|-----------|
| H | 5.418348  | 0.347555  | -3.489568 |
| H | 2.834697  | -2.666457 | -0.989521 |
| H | 3.801042  | -0.742225 | -1.961296 |
| H | 6.861740  | -1.038578 | -4.984594 |
| H | 6.651276  | -3.523553 | -4.937149 |
| H | 5.040284  | -4.610944 | -3.391615 |
| H | 2.487537  | -3.877399 | -2.227281 |
| C | 0.534766  | -8.427799 | -1.584110 |
| C | 1.830149  | -6.403870 | -3.032449 |
| C | 3.320862  | -8.663098 | -2.161337 |
| H | 0.441836  | -8.891635 | -2.576848 |
| H | 0.527683  | -9.223147 | -0.828127 |
| H | -0.331345 | -7.774147 | -1.412690 |
| H | 2.934080  | -9.118633 | -3.084541 |
| H | 4.271110  | -8.161270 | -2.384391 |
| H | 3.509874  | -9.451009 | -1.420358 |
| H | 1.572724  | -7.053311 | -3.881023 |
| H | 1.007741  | -5.695781 | -2.861413 |
| H | 2.736356  | -5.836896 | -3.279443 |
| C | -0.255927 | -7.698857 | 1.869706  |
| C | 2.069703  | -9.398922 | 1.789851  |
| C | 1.896760  | -7.290163 | 3.672646  |
| C | 7.142685  | -3.229879 | 3.131206  |
| C | 7.593547  | -4.368187 | 0.555265  |
| C | 6.291994  | -1.875538 | 0.743202  |
| H | -0.598925 | -8.378789 | 2.662591  |
| H | -0.675727 | -6.701065 | 2.049241  |
| H | -0.626833 | -8.059008 | 0.903660  |
| H | 1.392107  | -8.062856 | 4.271368  |
| H | 2.971677  | -7.306229 | 3.884216  |
| H | 1.503781  | -6.305599 | 3.948877  |
| H | 1.522859  | -9.971520 | 2.552647  |
| H | 1.849911  | -9.821573 | 0.801490  |
| H | 3.148121  | -9.486152 | 1.974218  |
| H | 8.100265  | -2.722916 | 2.940902  |
| H | 6.529578  | -2.606434 | 3.793772  |
| H | 7.335969  | -4.180178 | 3.645907  |
| H | 8.493117  | -3.735614 | 0.562149  |
| H | 7.837084  | -5.350475 | 0.979769  |

|   |           |           |           |
|---|-----------|-----------|-----------|
| H | 7.255090  | -4.498919 | -0.480856 |
| H | 7.314712  | -1.471311 | 0.767447  |
| H | 5.965544  | -1.957963 | -0.301636 |
| H | 5.621635  | -1.177800 | 1.260625  |
| C | 3.662421  | -1.763796 | 3.564477  |
| C | 2.121319  | -1.686946 | 1.182662  |
| C | 1.405598  | -3.430101 | 3.303301  |
| H | 2.903770  | -1.058065 | 3.932303  |
| H | 4.058989  | -2.336656 | 4.412478  |
| H | 4.486050  | -1.193823 | 3.116027  |
| H | 0.871970  | -2.538830 | 3.666890  |
| H | 0.733006  | -4.025076 | 2.675961  |
| H | 1.724894  | -4.034286 | 4.161710  |
| H | 1.593133  | -0.930137 | 1.780352  |
| H | 2.886617  | -1.184283 | 0.578269  |
| H | 1.398431  | -2.184475 | 0.524934  |
| C | 5.903783  | -7.452223 | 0.174175  |
| C | 7.146299  | -7.996324 | 0.851169  |
| H | 5.455332  | -8.239096 | -0.446685 |
| H | 6.146523  | -6.612176 | -0.491310 |
| C | 8.054490  | -8.751814 | 0.085869  |
| C | 9.219827  | -9.271329 | 0.653331  |
| C | 9.506114  | -9.042294 | 2.003896  |
| C | 8.611718  | -8.297895 | 2.777074  |
| C | 7.441736  | -7.781989 | 2.206495  |
| H | 7.848243  | -8.930454 | -0.972636 |
| H | 9.904927  | -9.858411 | 0.037978  |
| H | 10.417514 | -9.445729 | 2.448399  |
| H | 8.821634  | -8.121407 | 3.834541  |
| H | 6.732515  | -7.223253 | 2.820727  |

**[Fe<sub>2</sub>(SBn)<sub>2</sub>(CO)<sub>2</sub>(PMe<sub>3</sub>)<sub>4</sub>]<sup>+</sup>**

|   |          |           |           |
|---|----------|-----------|-----------|
| C | 4.910098 | -4.361868 | -4.160945 |
| C | 4.190901 | -4.746396 | -3.016829 |
| C | 3.279365 | -5.811160 | -3.125046 |
| C | 3.082785 | -6.460681 | -4.346190 |
| C | 3.799413 | -6.063395 | -5.480106 |
| C | 4.717483 | -5.014208 | -5.382703 |
| C | 4.473586 | -4.073547 | -1.695915 |

|    |           |           |           |
|----|-----------|-----------|-----------|
| S  | 2.960119  | -3.789797 | -0.623011 |
| Fe | 1.605550  | -1.931139 | -0.575814 |
| P  | -0.532150 | -1.071272 | -0.583812 |
| C  | -1.731433 | -1.569978 | 0.747784  |
| Fe | 3.385559  | -2.601444 | 1.279838  |
| P  | 4.372682  | -4.246729 | 2.459576  |
| C  | 3.431322  | -5.083656 | 3.821472  |
| S  | 1.117322  | -2.918391 | 1.498357  |
| C  | 0.396061  | -4.622992 | 1.144216  |
| C  | 0.059523  | -5.424581 | 2.374620  |
| C  | 0.396527  | -6.788063 | 2.419377  |
| C  | 0.037099  | -7.580332 | 3.514278  |
| C  | -0.659348 | -7.017422 | 4.587037  |
| C  | -0.998511 | -5.660388 | 4.554833  |
| C  | -0.645086 | -4.871946 | 3.457234  |
| P  | 3.277431  | -1.080410 | 3.013795  |
| C  | 1.802217  | 0.055328  | 3.075421  |
| C  | 2.485082  | -0.508886 | -0.021825 |
| O  | 2.950112  | 0.571999  | 0.080506  |
| C  | 3.202058  | -1.690167 | 4.771964  |
| C  | 4.676798  | 0.133035  | 3.095063  |
| P  | 2.067923  | -1.230587 | -2.691573 |
| C  | 1.541163  | -2.370605 | -4.057243 |
| C  | 1.390557  | 0.408618  | -3.258153 |
| C  | 3.852019  | -0.907709 | -3.081981 |
| C  | -0.667853 | 0.774416  | -0.420103 |
| C  | -1.590596 | -1.455249 | -2.070030 |
| C  | 4.929255  | -5.732283 | 1.491441  |
| C  | 5.977160  | -3.801644 | 3.287278  |
| H  | -0.511844 | -4.410731 | 0.559954  |
| H  | 1.089583  | -5.166001 | 0.490157  |
| H  | 0.933261  | -7.237403 | 1.580077  |
| H  | 0.299901  | -8.639313 | 3.526763  |
| H  | -0.941739 | -7.633481 | 5.441830  |
| H  | -1.548894 | -5.216468 | 5.386104  |
| H  | -0.915837 | -3.814438 | 3.439968  |
| H  | 5.092030  | -4.730426 | -1.068753 |
| H  | 5.032121  | -3.140049 | -1.823910 |
| H  | 2.715956  | -6.129459 | -2.245936 |

|   |           |           |           |
|---|-----------|-----------|-----------|
| H | 2.371809  | -7.286161 | -4.411449 |
| H | 3.647346  | -6.573593 | -6.432223 |
| H | 5.290169  | -4.703413 | -6.257890 |
| H | 5.644815  | -3.555543 | -4.093444 |
| H | 3.928139  | -0.408308 | -4.057692 |
| H | 4.290633  | -0.261579 | -2.311747 |
| H | 4.410413  | -1.845470 | -3.127413 |
| H | 1.807454  | -1.942578 | -5.033821 |
| H | 2.042012  | -3.338794 | -3.936054 |
| H | 0.456768  | -2.531340 | -4.017375 |
| H | 1.735046  | 0.603657  | -4.282962 |
| H | 0.296115  | 0.434435  | -3.250286 |
| H | 1.773071  | 1.203066  | -2.604027 |
| H | 4.526956  | 0.834120  | 3.927381  |
| H | 5.629758  | -0.393210 | 3.233546  |
| H | 4.723708  | 0.693459  | 2.152992  |
| H | 1.818483  | 0.618240  | 4.018752  |
| H | 1.829561  | 0.759249  | 2.237747  |
| H | 0.881223  | -0.539287 | 3.027168  |
| H | 3.170547  | -0.827993 | 5.452614  |
| H | 2.289559  | -2.283661 | 4.911531  |
| H | 4.072009  | -2.303870 | 5.030974  |
| H | 6.392423  | -4.675228 | 3.808380  |
| H | 6.697016  | -3.462616 | 2.531067  |
| H | 5.838228  | -2.992211 | 4.013754  |
| H | 5.323731  | -6.494170 | 2.178114  |
| H | 4.088510  | -6.151308 | 0.926303  |
| H | 5.725778  | -5.448503 | 0.792644  |
| H | 4.072744  | -5.832148 | 4.308080  |
| H | 3.094044  | -4.359507 | 4.568834  |
| H | 2.547507  | -5.580570 | 3.403176  |
| H | -2.684291 | -1.045335 | 0.591240  |
| H | -1.913964 | -2.651251 | 0.720691  |
| H | -1.329530 | -1.311392 | 1.733390  |
| H | -1.716271 | 1.088292  | -0.519574 |
| H | -0.302255 | 1.062983  | 0.573998  |
| H | -0.060126 | 1.291949  | -1.168311 |
| H | -2.583903 | -0.999096 | -1.956018 |
| H | -1.140203 | -1.086946 | -2.998231 |



|   |           |           |           |
|---|-----------|-----------|-----------|
| H | -1.708335 | -2.544035 | -2.152663 |
| C | 4.928253  | -1.989609 | 0.750007  |
| O | 5.955700  | -1.586425 | 0.362072  |

**Fe<sub>2</sub>(SBn)(S)(CO)<sub>2</sub>(PMe<sub>3</sub>)<sub>4</sub>**

|    |          |           |           |
|----|----------|-----------|-----------|
| C  | 5.471184 | -1.915236 | -4.147852 |
| C  | 4.735427 | -2.796860 | -3.353012 |
| C  | 3.775277 | -2.320614 | -2.441949 |
| C  | 3.576441 | -0.932307 | -2.356680 |
| C  | 4.311537 | -0.046530 | -3.151146 |
| C  | 5.262894 | -0.534754 | -4.050525 |
| C  | 2.936620 | -3.264662 | -1.618619 |
| S  | 3.941583 | -4.621396 | -0.784171 |
| Fe | 2.636639 | -6.224480 | 0.184920  |
| P  | 2.383576 | -7.397142 | -1.684943 |
| Fe | 4.442487 | -4.580789 | 1.484902  |
| P  | 3.282618 | -2.847099 | 2.347734  |
| C  | 4.804590 | -5.032620 | 3.117586  |
| O  | 5.082066 | -5.336586 | 4.220533  |
| P  | 6.444744 | -3.676791 | 1.124817  |
| S  | 4.641771 | -6.770997 | 1.028528  |
| P  | 1.796945 | -7.693133 | 1.640536  |
| C  | 1.149876 | -5.308602 | 0.135811  |
| O  | 0.169332 | -4.650915 | 0.133800  |
| H  | 4.137521 | 1.027965  | -3.067523 |
| H  | 2.342011 | -2.722690 | -0.879828 |
| H  | 2.824225 | -0.541720 | -1.667833 |
| H  | 5.836869 | 0.153823  | -4.673026 |
| H  | 6.209866 | -2.307492 | -4.849583 |
| H  | 4.913974 | -3.871315 | -3.423658 |
| H  | 2.234202 | -3.810967 | -2.263545 |
| C  | 0.980282 | -8.611588 | -1.905943 |
| C  | 2.146036 | -6.426579 | -3.259646 |
| C  | 3.845974 | -8.448481 | -2.154244 |
| H  | 1.017169 | -9.071291 | -2.904644 |
| H  | 1.032416 | -9.407445 | -1.152036 |
| H  | 0.022974 | -8.085460 | -1.791758 |
| H  | 3.696142 | -8.945702 | -3.124497 |
| H  | 4.731469 | -7.801739 | -2.195779 |

|   |           |            |           |
|---|-----------|------------|-----------|
| H | 4.020586  | -9.199902  | -1.374270 |
| H | 2.075816  | -7.097201  | -4.128433 |
| H | 1.223864  | -5.834258  | -3.189679 |
| H | 2.994089  | -5.745000  | -3.398664 |
| C | -0.040625 | -8.010604  | 1.592248  |
| C | 2.468974  | -9.431223  | 1.627889  |
| C | 1.997655  | -7.283224  | 3.442029  |
| C | 7.584485  | -3.462720  | 2.580421  |
| C | 7.511900  | -4.696662  | -0.005235 |
| C | 6.584713  | -2.000647  | 0.322302  |
| H | -0.336654 | -8.725498  | 2.373215  |
| H | -0.573061 | -7.063404  | 1.748303  |
| H | -0.334665 | -8.407408  | 0.613261  |
| H | 1.542159  | -8.063176  | 4.069770  |
| H | 3.065259  | -7.195871  | 3.672990  |
| H | 1.514660  | -6.320712  | 3.650658  |
| H | 2.018051  | -10.031933 | 2.431054  |
| H | 2.265032  | -9.915524  | 0.664082  |
| H | 3.555836  | -9.378153  | 1.770723  |
| H | 8.559798  | -3.068644  | 2.259925  |
| H | 7.139990  | -2.773581  | 3.309782  |
| H | 7.728959  | -4.432334  | 3.073882  |
| H | 8.489138  | -4.219375  | -0.170403 |
| H | 7.647064  | -5.690086  | 0.441043  |
| H | 6.988350  | -4.823509  | -0.961002 |
| H | 7.637486  | -1.730719  | 0.152037  |
| H | 6.052073  | -2.011857  | -0.636956 |
| H | 6.123228  | -1.239493  | 0.965370  |
| C | 4.192717  | -1.854558  | 3.644297  |
| C | 2.551458  | -1.434775  | 1.365362  |
| C | 1.776727  | -3.322660  | 3.338633  |
| H | 3.519839  | -1.138472  | 4.137763  |
| H | 4.611546  | -2.531474  | 4.400275  |
| H | 5.018682  | -1.299895  | 3.179420  |
| H | 1.308133  | -2.439720  | 3.798597  |
| H | 1.053781  | -3.816319  | 2.677495  |
| H | 2.074429  | -4.026675  | 4.125868  |
| H | 2.214175  | -0.639226  | 2.045999  |
| H | 3.297531  | -1.025686  | 0.672980  |

H 1.685737 -1.790631 0.792192

**[Fe<sub>2</sub>(SBn)(S)(CO)<sub>2</sub>(PMe<sub>3</sub>)<sub>4</sub>]<sup>+</sup>**

C 5.375767 -1.913484 -4.000742  
C 4.643912 -2.798139 -3.205602  
C 3.660793 -2.324998 -2.318939  
C 3.425287 -0.941531 -2.260149  
C 4.155011 -0.054168 -3.057493  
C 5.135137 -0.537214 -3.927952  
C 2.815046 -3.269332 -1.501953  
S 3.813886 -4.613884 -0.645354  
Fe 2.538368 -6.296043 0.213268  
P 2.455109 -7.420973 -1.687126  
Fe 4.502938 -4.547562 1.570141  
P 3.515387 -2.689060 2.432788  
C 5.011610 -4.925199 3.195821  
O 5.349585 -5.193338 4.280420  
P 6.477042 -3.684868 1.033779  
S 4.379315 -6.720371 1.315283  
P 1.565198 -7.813590 1.592415  
C 0.995730 -5.492798 -0.022816  
O -0.010584 -4.902770 -0.126783  
H 3.951902 1.016331 -3.001187  
H 2.203434 -2.730665 -0.773076  
H 2.647011 -0.554132 -1.599484  
H 5.704347 0.152712 -4.552346  
H 6.132047 -2.299787 -4.686188  
H 4.843299 -3.870067 -3.268354  
H 2.127273 -3.831596 -2.148794  
C 1.200314 -8.764845 -1.943360  
C 2.176486 -6.430862 -3.230788  
C 4.051971 -8.287264 -2.056583  
H 1.345523 -9.220576 -2.933211  
H 1.301141 -9.547860 -1.182092  
H 0.187701 -8.344456 -1.894445  
H 4.001524 -8.796943 -3.029555  
H 4.858841 -7.544268 -2.068861  
H 4.268354 -9.016947 -1.267251  
H 2.195060 -7.091786 -4.108649

|   |           |            |           |
|---|-----------|------------|-----------|
| H | 1.200218  | -5.931180  | -3.184804 |
| H | 2.962343  | -5.674409  | -3.339228 |
| C | -0.225349 | -8.222525  | 1.320845  |
| C | 2.348545  | -9.486872  | 1.754015  |
| C | 1.521956  | -7.242620  | 3.356427  |
| C | 7.701136  | -3.483186  | 2.409293  |
| C | 7.395558  | -4.783521  | -0.141421 |
| C | 6.551703  | -2.035853  | 0.192676  |
| H | -0.575421 | -8.908377  | 2.104384  |
| H | -0.822514 | -7.302810  | 1.356749  |
| H | -0.377361 | -8.695740  | 0.344338  |
| H | 1.000333  | -7.979695  | 3.982898  |
| H | 2.546912  | -7.108378  | 3.721448  |
| H | 0.994013  | -6.282718  | 3.417515  |
| H | 1.831726  | -10.075479 | 2.524305  |
| H | 2.298796  | -10.028850 | 0.801363  |
| H | 3.402032  | -9.363570  | 2.033780  |
| H | 8.647441  | -3.091430  | 2.010879  |
| H | 7.320593  | -2.791225  | 3.170593  |
| H | 7.886713  | -4.453593  | 2.886215  |
| H | 8.375450  | -4.348936  | -0.385681 |
| H | 7.532276  | -5.768488  | 0.321504  |
| H | 6.802423  | -4.902586  | -1.055494 |
| H | 7.588436  | -1.805802  | -0.091433 |
| H | 5.923221  | -2.045928  | -0.706419 |
| H | 6.193118  | -1.249670  | 0.869554  |
| C | 4.460027  | -1.785020  | 3.754095  |
| C | 2.912844  | -1.253133  | 1.416111  |
| C | 1.962865  | -3.154299  | 3.340525  |
| H | 3.816573  | -1.037343  | 4.237550  |
| H | 4.822799  | -2.487172  | 4.514635  |
| H | 5.322919  | -1.268346  | 3.313671  |
| H | 1.493074  | -2.266662  | 3.787675  |
| H | 1.257378  | -3.620150  | 2.640653  |
| H | 2.202322  | -3.874017  | 4.133115  |
| H | 2.644479  | -0.420900  | 2.081876  |
| H | 3.685440  | -0.920002  | 0.713654  |
| H | 2.019863  | -1.542188  | 0.849301  |

**Fe<sub>2</sub>(SBn)(S)(CO)<sub>6</sub>**

|    |          |           |           |
|----|----------|-----------|-----------|
| C  | 7.387370 | 2.369300  | -0.930447 |
| C  | 7.274201 | 1.063815  | -1.414291 |
| C  | 6.547616 | 0.097596  | -0.699559 |
| C  | 5.935933 | 0.468339  | 0.510152  |
| C  | 6.047954 | 1.772667  | 0.994176  |
| C  | 6.774020 | 2.727043  | 0.274194  |
| C  | 6.415916 | -1.304693 | -1.215402 |
| S  | 4.787400 | -1.488530 | -2.159200 |
| Fe | 4.301715 | -3.647657 | -2.748852 |
| C  | 3.324852 | -4.080822 | -1.320622 |
| O  | 2.695459 | -4.357537 | -0.391092 |
| Fe | 4.956895 | -1.753412 | -4.438088 |
| C  | 4.731168 | -0.044494 | -4.911402 |
| O  | 4.584266 | 1.058108  | -5.224267 |
| C  | 4.834607 | -2.439229 | -6.084066 |
| O  | 4.756116 | -2.871010 | -7.152990 |
| C  | 6.748298 | -1.828537 | -4.439204 |
| O  | 7.905475 | -1.880745 | -4.451653 |
| S  | 2.907141 | -2.567584 | -4.113646 |
| C  | 3.935377 | -5.115684 | -3.704879 |
| O  | 3.688267 | -6.068085 | -4.310399 |
| C  | 5.891093 | -4.276125 | -2.199388 |
| O  | 6.911399 | -4.690792 | -1.842947 |
| H  | 5.571825 | 2.044430  | 1.937799  |
| H  | 7.251566 | -1.590996 | -1.861947 |
| H  | 5.369233 | -0.274584 | 1.076523  |
| H  | 6.864132 | 3.746215  | 0.653339  |
| H  | 7.959244 | 3.108535  | -1.493635 |
| H  | 7.761647 | 0.788352  | -2.352075 |
| H  | 6.341638 | -2.026064 | -0.391294 |

**[Fe<sub>2</sub>(SBn)(S)(CO)<sub>6</sub>]<sup>+</sup>**

|   |          |          |           |
|---|----------|----------|-----------|
| C | 7.387370 | 2.369300 | -0.930447 |
| C | 7.274201 | 1.063815 | -1.414291 |
| C | 6.547616 | 0.097596 | -0.699559 |
| C | 5.935933 | 0.468339 | 0.510152  |
| C | 6.047954 | 1.772667 | 0.994176  |
| C | 6.774020 | 2.727043 | 0.274194  |

|    |          |            |           |
|----|----------|------------|-----------|
| C  | 6.415916 | -1.304693  | -1.215402 |
| S  | 4.787400 | -1.488530  | -2.159200 |
| Fe | 4.301715 | -3.647657  | -2.748852 |
| C  | 3.324852 | -4.080822  | -1.320622 |
| O  | 2.695459 | -4.357537  | -0.391092 |
| Fe | 4.956895 | -1.753412  | -4.438088 |
| C  | 4.731168 | -0.044494  | -4.911402 |
| O  | 4.584266 | 1.058108   | -5.224267 |
| C  | 4.834607 | -2.439229  | -6.084066 |
| O  | 4.756116 | -2.871010  | -7.152990 |
| C  | 6.748298 | -1.828537  | -4.439204 |
| O  | 7.905475 | -1.880745  | -4.451653 |
| S  | 2.907141 | -2.567584  | -4.113646 |
| C  | 3.935377 | -5.115684  | -3.704879 |
| O  | 3.688267 | -6.068085  | -4.310399 |
| C  | 5.891093 | -4.276125  | -2.199388 |
| O  | 6.911399 | -4.690792  | -1.842947 |
| H  | 5.571825 | 2.044430   | 1.937799  |
| H  | 7.251566 | -1.590996  | -1.861947 |
| H  | 5.369233 | -0.274584  | 1.076523  |
| H  | 6.864132 | 3.746215   | 0.653339  |
| H  | 7.959244 | 3.108535   | -1.493635 |
| H  | 7.434597 | -11.103610 | -8.716635 |
| H  | 6.552967 | -11.182023 | -6.383493 |
| H  | 5.364470 | -9.218035  | -5.436236 |
| H  | 7.761647 | 0.788352   | -2.352075 |
| H  | 6.341638 | -2.026064  | -0.391294 |

**Fe<sub>2</sub>(SBn)(S)(CO)<sub>4</sub>(PMe<sub>3</sub>)<sub>2</sub>**

|    |           |           |            |
|----|-----------|-----------|------------|
| C  | -0.214285 | -2.566551 | -6.369136  |
| P  | 0.558639  | -7.437815 | -8.920856  |
| S  | 2.971808  | -7.064423 | -6.754080  |
| Fe | 1.998439  | -5.223148 | -5.788765  |
| Fe | 2.041112  | -5.780908 | -8.400512  |
| C  | 3.111022  | -6.044262 | -9.766300  |
| O  | 3.831511  | -6.150678 | -10.677917 |
| S  | 3.022928  | -4.062376 | -7.367828  |
| C  | 0.980022  | -4.625747 | -9.208177  |
| O  | 0.294545  | -3.859754 | -9.761022  |

|   |           |            |            |
|---|-----------|------------|------------|
| C | 2.955145  | -5.264229  | -4.310457  |
| O | 3.589713  | -5.320026  | -3.331800  |
| C | 0.587938  | -6.187087  | -5.304598  |
| O | -0.334707 | -6.826803  | -4.977615  |
| P | 0.991128  | -3.309172  | -5.175488  |
| C | 2.131935  | -1.896890  | -4.810198  |
| C | -1.213961 | -7.190256  | -8.423658  |
| C | 0.388556  | -7.701085  | -10.750650 |
| C | 0.897839  | -9.159103  | -8.321219  |
| C | -0.006363 | -3.412626  | -3.613532  |
| H | -1.843929 | -8.005742  | -8.807949  |
| H | -1.290224 | -7.159788  | -7.330242  |
| H | -1.573683 | -6.235310  | -8.827589  |
| H | 0.139542  | -9.850884  | -8.714868  |
| H | 1.894787  | -9.470918  | -8.656239  |
| H | 0.885926  | -9.183208  | -7.224971  |
| H | -0.355059 | -8.480431  | -10.968593 |
| H | 0.079154  | -6.762602  | -11.229136 |
| H | 1.358804  | -7.996344  | -11.169937 |
| H | 1.561892  | -1.001550  | -4.525000  |
| H | 2.805630  | -2.177667  | -3.990564  |
| H | 2.735594  | -1.685667  | -5.701407  |
| H | -0.432704 | -2.433630  | -3.352839  |
| H | -0.819731 | -4.138859  | -3.739139  |
| H | 0.637525  | -3.756156  | -2.793500  |
| H | -0.657534 | -1.650476  | -5.952818  |
| H | 0.306387  | -2.331812  | -7.305377  |
| H | -1.009409 | -3.291081  | -6.585328  |
| C | 4.842755  | -6.835116  | -6.637027  |
| H | 5.045938  | -6.740119  | -5.563158  |
| H | 5.084201  | -5.886895  | -7.132099  |
| C | 5.564122  | -8.013034  | -7.220296  |
| C | 6.068642  | -7.980378  | -8.530927  |
| C | 6.736658  | -9.085371  | -9.065912  |
| C | 6.910768  | -10.241829 | -8.299268  |
| C | 6.414361  | -10.286177 | -6.991577  |
| C | 5.748603  | -9.180920  | -6.458355  |
| H | 5.940057  | -7.080823  | -9.134773  |
| H | 7.126066  | -9.040280  | -10.084586 |

|   |          |            |           |
|---|----------|------------|-----------|
| H | 7.434597 | -11.103610 | -8.716635 |
| H | 6.552967 | -11.182023 | -6.383493 |
| H | 5.364470 | -9.218035  | -5.436236 |

**[Fe<sub>2</sub>(SBn)(S)(CO)<sub>4</sub>(PMe<sub>3</sub>)<sub>2</sub>]<sup>+</sup>**

|    |          |            |            |
|----|----------|------------|------------|
| Fe | 3.551888 | -9.760747  | -7.307373  |
| Fe | 4.749006 | -7.177261  | -7.404401  |
| P  | 6.502975 | -6.734351  | -8.794974  |
| H  | 8.273231 | -8.048939  | -7.736416  |
| C  | 2.607667 | -12.975970 | -6.464232  |
| P  | 2.947731 | -11.288780 | -5.799705  |
| C  | 4.258373 | -11.545532 | -4.526093  |
| S  | 3.169438 | -7.970670  | -5.958194  |
| C  | 3.658060 | -6.215904  | -8.427072  |
| O  | 2.930401 | -5.644839  | -9.125458  |
| S  | 5.646732 | -9.131205  | -7.109620  |
| C  | 5.192520 | -5.838772  | -6.361827  |
| O  | 5.514034 | -4.986356  | -5.648333  |
| C  | 8.171974 | -7.004826  | -8.056078  |
| C  | 6.573096 | -4.987811  | -9.393705  |
| C  | 6.500140 | -7.737927  | -10.343780 |
| C  | 1.942045 | -9.693577  | -8.069177  |
| O  | 0.918211 | -9.614285  | -8.606065  |
| C  | 4.149116 | -10.975099 | -8.457939  |
| O  | 4.537249 | -11.750552 | -9.224197  |
| C  | 1.430271 | -10.906123 | -4.819710  |
| H  | 1.229380 | -11.723458 | -4.113222  |
| H  | 1.575434 | -9.974812  | -4.259260  |
| H  | 0.567748 | -10.793722 | -5.488969  |
| H  | 3.930652 | -12.297747 | -3.794404  |
| H  | 5.180351 | -11.884899 | -5.013322  |
| H  | 4.458656 | -10.595423 | -4.016392  |
| H  | 2.315809 | -13.645676 | -5.643213  |
| H  | 1.791978 | -12.933224 | -7.197349  |
| H  | 3.501740 | -13.380079 | -6.954656  |
| H  | 8.950148 | -6.769983  | -8.795151  |
| H  | 8.296531 | -6.354190  | -7.181032  |
| H  | 7.446682 | -4.851419  | -10.045681 |
| H  | 5.665040 | -4.742514  | -9.958491  |



|   |          |           |            |
|---|----------|-----------|------------|
| H | 6.653897 | -4.300640 | -8.541683  |
| H | 7.331435 | -7.430969 | -10.993393 |
| H | 6.605798 | -8.799459 | -10.089550 |
| H | 5.552559 | -7.594919 | -10.878717 |
| C | 1.456496 | -7.183176 | -6.099238  |
| C | 1.402487 | -5.884092 | -5.349029  |
| H | 1.198760 | -7.060096 | -7.155856  |
| H | 0.787200 | -7.936189 | -5.659309  |
| C | 1.228766 | -4.674696 | -6.040835  |
| C | 1.150119 | -3.465041 | -5.345145  |
| C | 1.254417 | -3.449807 | -3.951790  |
| C | 1.428955 | -4.650042 | -3.253408  |
| C | 1.498604 | -5.858586 | -3.946626  |
| H | 1.130611 | -4.681036 | -7.128247  |
| H | 1.000499 | -2.533858 | -5.893295  |
| H | 1.191771 | -2.506098 | -3.408402  |
| H | 1.501231 | -4.643387 | -2.165001  |
| H | 1.626296 | -6.791726 | -3.392806  |

B97-D/TZVP:

**Fe<sub>2</sub>(SBn)<sub>2</sub>(CO)<sub>2</sub>(dppv)<sub>2</sub>**

|    |           |           |           |
|----|-----------|-----------|-----------|
| C  | -1.184907 | -4.565045 | 2.823208  |
| C  | -0.113673 | -5.121917 | 2.106791  |
| C  | 0.364339  | -6.392458 | 2.474240  |
| C  | -0.238641 | -7.102748 | 3.513968  |
| C  | -1.318252 | -6.550041 | 4.209760  |
| C  | -1.782595 | -5.276528 | 3.868919  |
| P  | 0.702089  | -4.232631 | 0.679929  |
| C  | -0.023942 | -2.526269 | 0.841410  |
| C  | 0.473170  | -1.556682 | 1.728500  |
| C  | -0.142764 | -0.305649 | 1.823994  |
| C  | -1.269175 | -0.015480 | 1.046480  |
| C  | -1.773083 | -0.979345 | 0.168646  |
| C  | -1.150815 | -2.225473 | 0.061075  |
| Fe | 0.949385  | -5.054436 | -1.385328 |
| S  | 0.885335  | -6.155917 | -3.380713 |
| C  | 0.919801  | -5.040173 | -4.903167 |
| C  | 1.854304  | -5.674180 | -5.890170 |
| C  | 1.385207  | -6.630250 | -6.805552 |

|    |           |            |           |
|----|-----------|------------|-----------|
| C  | 2.273801  | -7.298420  | -7.651933 |
| C  | 3.645176  | -7.023360  | -7.593634 |
| C  | 4.120422  | -6.067501  | -6.688465 |
| C  | 3.230820  | -5.398663  | -5.843765 |
| Fe | -1.145830 | -6.302281  | -2.358800 |
| P  | -1.888529 | -7.844081  | -3.750032 |
| C  | -1.008439 | -9.475386  | -3.719332 |
| C  | -1.473896 | -10.540319 | -2.929547 |
| C  | -0.706309 | -11.700152 | -2.782476 |
| C  | 0.534242  | -11.810569 | -3.418307 |
| C  | 1.000994  | -10.754648 | -4.210122 |
| C  | 0.239855  | -9.593971  | -4.359083 |
| C  | -3.641473 | -8.286056  | -3.333085 |
| C  | -4.151772 | -7.714304  | -2.239023 |
| P  | -3.008273 | -6.672267  | -1.187348 |
| C  | -3.091840 | -7.764162  | 0.332523  |
| C  | -3.967155 | -7.529654  | 1.404159  |
| C  | -4.049127 | -8.439528  | 2.463847  |
| C  | -3.262766 | -9.593732  | 2.465426  |
| C  | -2.398545 | -9.840427  | 1.394319  |
| C  | -2.315074 | -8.935584  | 0.335395  |
| C  | -2.047586 | -7.517148  | -5.585320 |
| C  | -2.349165 | -6.213275  | -6.009677 |
| C  | -2.485283 | -5.922813  | -7.370333 |
| C  | -2.327523 | -6.931836  | -8.325115 |
| C  | -2.049104 | -8.237858  | -7.909784 |
| C  | -1.913702 | -8.530613  | -6.549213 |
| C  | -4.084187 | -5.226444  | -0.758998 |
| C  | -5.129214 | -4.816828  | -1.600626 |
| C  | -5.852269 | -3.655395  | -1.312536 |
| C  | -5.538086 | -2.891986  | -0.184459 |
| C  | -4.488725 | -3.289584  | 0.650970  |
| C  | -3.760864 | -4.443552  | 0.359678  |
| S  | 0.211743  | -7.117280  | -0.699047 |
| C  | 1.321001  | -8.595355  | -1.146920 |
| C  | 1.624953  | -9.359985  | 0.105486  |
| C  | 0.910108  | -10.523627 | 0.429817  |
| C  | 1.154719  | -11.208039 | 1.623362  |
| C  | 2.117577  | -10.735553 | 2.521128  |

|   |           |            |           |
|---|-----------|------------|-----------|
| C | 2.840313  | -9.578202  | 2.207095  |
| C | 2.592757  | -8.898601  | 1.013516  |
| P | 3.141330  | -4.925385  | -1.079976 |
| C | 4.054995  | -3.566907  | -1.989071 |
| C | 3.676956  | -2.239679  | -1.719550 |
| C | 4.277844  | -1.178881  | -2.399063 |
| C | 5.257971  | -1.426414  | -3.366739 |
| C | 5.638237  | -2.742860  | -3.640835 |
| C | 5.047827  | -3.808015  | -2.951677 |
| C | 0.731186  | -3.481020  | -2.113337 |
| O | 0.595214  | -2.446941  | -2.639811 |
| C | 2.410809  | -4.044184  | 1.411638  |
| C | 3.467573  | -4.384675  | 0.667078  |
| C | 4.276043  | -6.378056  | -1.335604 |
| C | 5.150621  | -6.861308  | -0.348821 |
| C | 5.955210  | -7.978437  | -0.597333 |
| C | 5.905658  | -8.622426  | -1.836797 |
| C | 5.043953  | -8.143221  | -2.828674 |
| C | 4.231683  | -7.034984  | -2.579514 |
| H | 0.768165  | -9.205132  | -1.859779 |
| H | 2.221012  | -8.214608  | -1.629387 |
| H | 3.155308  | -8.000397  | 0.772724  |
| H | 3.599185  | -9.207343  | 2.895258  |
| H | 2.310370  | -11.268299 | 3.450756  |
| H | 0.591382  | -12.111059 | 1.855681  |
| H | 0.161839  | -10.893544 | -0.268472 |
| H | 1.251997  | -4.047007  | -4.594469 |
| H | -0.102085 | -4.976939  | -5.280817 |
| H | 3.602433  | -4.659171  | -5.135664 |
| H | 5.185024  | -5.842175  | -6.640965 |
| H | 4.336822  | -7.544719  | -8.253410 |
| H | 1.894033  | -8.035218  | -8.358367 |
| H | 0.321206  | -6.850081  | -6.850547 |
| H | -4.206966 | -8.964726  | -3.972939 |
| H | 2.520908  | -3.692178  | 2.438064  |
| H | 4.489120  | -4.276131  | 1.033843  |
| H | -5.170616 | -7.893854  | -1.892820 |
| H | 2.902611  | -2.033639  | -0.984015 |
| H | 3.970214  | -0.158406  | -2.178986 |

|   |           |            |           |
|---|-----------|------------|-----------|
| H | 5.720001  | -0.599183  | -3.902207 |
| H | 6.402533  | -2.946623  | -4.389378 |
| H | 5.367504  | -4.824099  | -3.166954 |
| H | 5.201728  | -6.383369  | 0.626100  |
| H | 6.617952  | -8.348346  | 0.183238  |
| H | 6.530736  | -9.493352  | -2.025236 |
| H | 4.991735  | -8.634851  | -3.798625 |
| H | 3.548973  | -6.692902  | -3.352851 |
| H | 1.338938  | -1.766390  | 2.351272  |
| H | 0.256261  | 0.441106   | 2.508483  |
| H | -1.748602 | 0.959050   | 1.123295  |
| H | -2.647712 | -0.766158  | -0.442276 |
| H | -1.536778 | -2.963966  | -0.637543 |
| H | 1.199610  | -6.838139  | 1.945226  |
| H | 0.130950  | -8.094918  | 3.765082  |
| H | -1.794038 | -7.108093  | 5.014170  |
| H | -2.613430 | -4.832530  | 4.415220  |
| H | -1.551540 | -3.573480  | 2.570496  |
| H | -5.372942 | -5.393241  | -2.491116 |
| H | -6.658679 | -3.344959  | -1.975080 |
| H | -6.102733 | -1.988343  | 0.038309  |
| H | -4.223190 | -2.691791  | 1.520811  |
| H | -2.938108 | -4.739121  | 1.005631  |
| H | -4.590474 | -6.640570  | 1.419069  |
| H | -4.729080 | -8.238886  | 3.290551  |
| H | -3.323040 | -10.297015 | 3.294582  |
| H | -1.769043 | -10.726777 | 1.389010  |
| H | -1.636898 | -9.138024  | -0.487225 |
| H | -2.431389 | -10.461916 | -2.418197 |
| H | -1.077515 | -12.516925 | -2.165088 |
| H | 1.134352  | -12.709611 | -3.293880 |
| H | 1.969055  | -10.827195 | -4.702983 |
| H | 0.625032  | -8.771665  | -4.956873 |
| H | -1.688400 | -9.548096  | -6.241085 |
| H | -1.932867 | -9.032545  | -8.645083 |
| H | -2.423412 | -6.703033  | -9.384951 |
| H | -2.706013 | -4.903578  | -7.681822 |
| H | -2.470718 | -5.419755  | -5.279111 |
| C | -1.821428 | -4.817518  | -2.981781 |

O -2.276637 -3.810387 -3.374770

**[Fe<sub>2</sub>(SBn)<sub>2</sub>(CO)<sub>2</sub>(dppv)<sub>2</sub>]<sup>+</sup>**

C -0.945841 -4.256368 3.211096  
C 0.110979 -4.924943 2.565882  
C 0.755691 -5.973448 3.236378  
C 0.362591 -6.340567 4.527961  
C -0.679029 -5.662652 5.166702  
C -1.337113 -4.621080 4.499888  
C 0.558090 -4.481615 1.196341  
S 1.175409 -2.705962 1.332233  
Fe 3.429372 -2.273785 1.348646  
C 4.916705 -1.422143 0.978249  
O 5.878319 -0.845395 0.668043  
S 3.418189 -3.394924 -0.623153  
Fe 1.802548 -1.791241 -0.702191  
P 2.057086 -1.173597 -2.858318  
C 3.662626 -0.494733 -3.463807  
C 5.142257 -3.271062 -1.391266  
C 5.304792 -4.079100 -2.643946  
C 5.683559 -3.449231 -3.838556  
C 5.817991 -4.186097 -5.018070  
C 5.575401 -5.562324 -5.018120  
C 5.205745 -6.201730 -3.828216  
C 5.076606 -5.465617 -2.648913  
P -0.340547 -1.288891 -1.142724  
C -1.271395 -2.633018 -2.009699  
C 2.204799 -0.187284 -0.058522  
O 2.334034 0.939244 0.232452  
C -1.488772 -0.694643 0.163656  
C -0.295450 0.098961 -2.376393  
P 4.362001 -3.824871 2.658753  
C 6.214183 -3.708141 2.719969  
P 3.097029 -1.057955 3.259613  
C 4.339489 0.258729 3.674171  
C 3.842554 -3.462101 4.396380  
C 4.120174 -5.666415 2.495509  
C 1.488160 -0.263760 3.746410  
C 3.297687 -2.269904 4.647604

|   |           |           |           |
|---|-----------|-----------|-----------|
| C | 1.556226  | -2.425621 | -4.143195 |
| C | 0.804406  | 0.168657  | -3.133399 |
| H | -0.278964 | -4.438634 | 0.491929  |
| H | 1.340006  | -5.121764 | 0.783171  |
| H | 1.565300  | -6.507576 | 2.749478  |
| H | 0.873113  | -7.158079 | 5.033163  |
| H | -0.981437 | -5.946330 | 6.172722  |
| H | -2.155548 | -4.094611 | 4.987656  |
| H | -1.441129 | -3.429317 | 2.706443  |
| H | 5.788890  | -3.637850 | -0.586182 |
| H | 5.371659  | -2.220738 | -1.564192 |
| H | 4.785253  | -5.963785 | -1.725501 |
| H | 5.025428  | -7.275023 | -3.820749 |
| H | 5.676187  | -6.135774 | -5.937332 |
| H | 6.107472  | -3.682463 | -5.938081 |
| H | 5.854452  | -2.376135 | -3.848120 |
| H | 0.950278  | 0.911357  | -3.917100 |
| H | 2.962981  | -1.987326 | 5.645620  |
| H | 3.996091  | -4.193983 | 5.187460  |
| H | -1.137969 | 0.783528  | -2.473016 |
| C | 6.819241  | -2.637627 | 3.398331  |
| C | 8.201710  | -2.457125 | 3.330275  |
| C | 8.990842  | -3.336106 | 2.580781  |
| C | 8.391502  | -4.400133 | 1.900294  |
| C | 7.008157  | -4.590037 | 1.969376  |
| H | 6.216137  | -1.931634 | 3.963428  |
| H | 8.660683  | -1.624611 | 3.859468  |
| H | 10.067728 | -3.191479 | 2.526310  |
| H | 9.000341  | -5.088442 | 1.317522  |
| H | 6.553980  | -5.429390 | 1.446990  |
| C | 4.368794  | -6.509347 | 3.593878  |
| C | 4.223558  | -7.892600 | 3.471809  |
| C | 3.848413  | -8.458361 | 2.248593  |
| C | 3.630947  | -7.630092 | 1.145433  |
| C | 3.766569  | -6.243243 | 1.268163  |
| H | 4.690763  | -6.103683 | 4.548560  |
| H | 4.412261  | -8.529715 | 4.333454  |
| H | 3.736137  | -9.536517 | 2.156786  |
| H | 3.348270  | -8.058743 | 0.185929  |

|   |           |           |           |
|---|-----------|-----------|-----------|
| H | 3.583066  | -5.607656 | 0.408204  |
| C | 4.962904  | 0.318713  | 4.931582  |
| C | 5.890846  | 1.325754  | 5.210728  |
| C | 6.196535  | 2.288585  | 4.244227  |
| C | 5.570465  | 2.239895  | 2.995444  |
| C | 4.649573  | 1.229453  | 2.708452  |
| H | 4.739694  | -0.418617 | 5.697593  |
| H | 6.370531  | 1.358094  | 6.186866  |
| H | 6.917857  | 3.072587  | 4.464404  |
| H | 5.802906  | 2.984355  | 2.236986  |
| H | 4.176656  | 1.200269  | 1.732006  |
| C | 0.449572  | -1.077911 | 4.231434  |
| C | -0.730203 | -0.500751 | 4.702332  |
| C | -0.887748 | 0.887734  | 4.689904  |
| C | 0.130541  | 1.698261  | 4.181598  |
| C | 1.314524  | 1.127918  | 3.706635  |
| H | 0.557154  | -2.159346 | 4.251006  |
| H | -1.524448 | -1.140519 | 5.081635  |
| H | -1.804071 | 1.336053  | 5.068124  |
| H | 0.011730  | 2.779936  | 4.164352  |
| H | 2.106130  | 1.771851  | 3.333592  |
| C | -1.396759 | 0.632644  | 0.611618  |
| C | -2.270720 | 1.095412  | 1.596434  |
| C | -3.222233 | 0.236307  | 2.153068  |
| C | -3.294408 | -1.093897 | 1.730765  |
| C | -2.430588 | -1.561912 | 0.738342  |
| H | -0.647711 | 1.304115  | 0.195635  |
| H | -2.200952 | 2.126055  | 1.935124  |
| H | -3.901860 | 0.601035  | 2.920194  |
| H | -4.030538 | -1.767621 | 2.165182  |
| H | -2.507370 | -2.591373 | 0.397093  |
| C | -2.558908 | -2.415724 | -2.527135 |
| C | -3.208191 | -3.433687 | -3.228097 |
| C | -2.578573 | -4.669991 | -3.415202 |
| C | -1.297036 | -4.887227 | -2.902866 |
| C | -0.643065 | -3.870425 | -2.203658 |
| H | -3.057516 | -1.460188 | -2.375240 |
| H | -4.205631 | -3.263456 | -3.628129 |
| H | -3.088228 | -5.460819 | -3.961711 |

|   |           |           |           |
|---|-----------|-----------|-----------|
| H | -0.798803 | -5.841621 | -3.057360 |
| H | 0.368555  | -4.026056 | -1.832722 |
| C | 0.484318  | -2.193750 | -5.021292 |
| C | 0.089051  | -3.181578 | -5.926921 |
| C | 0.759379  | -4.406925 | -5.969481 |
| C | 1.827840  | -4.641847 | -5.098561 |
| C | 2.219303  | -3.661386 | -4.185581 |
| H | -0.062935 | -1.256387 | -4.990662 |
| H | -0.748761 | -2.991989 | -6.594448 |
| H | 0.447241  | -5.175195 | -6.673858 |
| H | 2.362019  | -5.588762 | -5.119342 |
| H | 3.036574  | -3.871347 | -3.506721 |
| C | 3.971090  | -0.476769 | -4.833838 |
| C | 5.199511  | 0.031058  | -5.263799 |
| C | 6.128160  | 0.511485  | -4.332889 |
| C | 5.822522  | 0.494433  | -2.968615 |
| C | 4.591159  | -0.003288 | -2.534663 |
| H | 3.267176  | -0.878291 | -5.559321 |
| H | 5.436665  | 0.040932  | -6.325553 |
| H | 7.089036  | 0.893124  | -4.671264 |
| H | 6.542090  | 0.855964  | -2.237423 |
| H | 4.363816  | -0.029073 | -1.473681 |

**Fe<sub>2</sub>(SBn)(S)(CO)<sub>2</sub>(dppv)<sub>2</sub>**

|    |           |           |           |
|----|-----------|-----------|-----------|
| C  | 0.026741  | -6.792778 | 3.290243  |
| C  | 0.894792  | -6.777718 | 2.190550  |
| C  | 1.829744  | -7.816192 | 2.036977  |
| C  | 1.882534  | -8.859057 | 2.962505  |
| C  | 1.005548  | -8.876791 | 4.053857  |
| C  | 0.083125  | -7.840543 | 4.217018  |
| P  | 0.912601  | -5.394562 | 0.937936  |
| C  | -0.417186 | -4.249527 | 1.528524  |
| C  | -0.151278 | -3.026615 | 2.162077  |
| C  | -1.201735 | -2.171891 | 2.511170  |
| C  | -2.523090 | -2.534213 | 2.234784  |
| C  | -2.791396 | -3.751771 | 1.600159  |
| C  | -1.745743 | -4.602344 | 1.239030  |
| Fe | 1.061276  | -5.730451 | -1.254629 |
| S  | 1.169664  | -6.371348 | -3.436937 |



|    |           |            |           |
|----|-----------|------------|-----------|
| C  | 1.014370  | -4.890139  | -4.583948 |
| C  | 1.490401  | -5.225855  | -5.973645 |
| C  | 0.680171  | -4.973941  | -7.088724 |
| C  | 1.131127  | -5.259079  | -8.381688 |
| C  | 2.399171  | -5.811523  | -8.580712 |
| C  | 3.213062  | -6.080608  | -7.473389 |
| C  | 2.762158  | -5.789770  | -6.184770 |
| Fe | -0.789404 | -7.159656  | -2.526250 |
| C  | -1.867981 | -5.787552  | -2.283848 |
| O  | -2.646313 | -4.938096  | -2.062378 |
| P  | -1.644356 | -7.885018  | -4.438017 |
| C  | -0.721982 | -9.278825  | -5.242635 |
| C  | -1.198828 | -10.599086 | -5.213141 |
| C  | -0.430823 | -11.639843 | -5.744662 |
| C  | 0.818425  | -11.373011 | -6.311898 |
| C  | 1.298607  | -10.057571 | -6.343631 |
| C  | 0.538887  | -9.015966  | -5.809421 |
| C  | -3.312106 | -8.623513  | -4.068325 |
| C  | -3.586208 | -8.870188  | -2.783643 |
| P  | -2.196124 | -8.556667  | -1.584398 |
| C  | -1.738102 | -10.331347 | -1.244076 |
| C  | -2.550178 | -11.149133 | -0.441205 |
| C  | -2.248804 | -12.504995 | -0.286010 |
| C  | -1.139864 | -13.056044 | -0.937359 |
| C  | -0.334282 | -12.245446 | -1.743167 |
| C  | -0.630097 | -10.888546 | -1.898659 |
| C  | -2.078537 | -6.772158  | -5.870523 |
| C  | -2.644622 | -5.516091  | -5.596732 |
| C  | -3.059602 | -4.687062  | -6.642651 |
| C  | -2.908240 | -5.098244  | -7.971379 |
| C  | -2.342077 | -6.345514  | -8.248666 |
| C  | -1.931927 | -7.180270  | -7.205416 |
| C  | -3.042733 | -8.023709  | -0.035200 |
| C  | -4.229720 | -7.276194  | -0.099939 |
| C  | -4.837735 | -6.821175  | 1.073021  |
| C  | -4.264528 | -7.105691  | 2.316371  |
| C  | -3.069606 | -7.829171  | 2.380991  |
| C  | -2.451123 | -8.278725  | 1.212571  |
| S  | 0.694601  | -7.947589  | -1.040149 |

|   |           |           |           |
|---|-----------|-----------|-----------|
| P | 3.181560  | -5.212273 | -1.090465 |
| C | 3.757761  | -3.823450 | -2.177671 |
| C | 3.398990  | -2.503623 | -1.857666 |
| C | 3.698410  | -1.459154 | -2.734606 |
| C | 4.343629  | -1.722668 | -3.947906 |
| C | 4.697212  | -3.035452 | -4.274959 |
| C | 4.412705  | -4.080168 | -3.391969 |
| C | 0.506437  | -4.082262 | -1.564386 |
| O | 0.112100  | -3.005264 | -1.777545 |
| C | 2.504750  | -4.591959 | 1.488955  |
| C | 3.514655  | -4.550844 | 0.613625  |
| C | 4.534707  | -6.470758 | -1.318040 |
| C | 5.883451  | -6.117840 | -1.132247 |
| C | 6.890494  | -7.069311 | -1.307966 |
| C | 6.560413  | -8.379667 | -1.676278 |
| C | 5.221546  | -8.730459 | -1.869183 |
| C | 4.208958  | -7.781092 | -1.691185 |
| H | 1.644404  | -4.112541 | -4.136966 |
| H | -0.021980 | -4.543337 | -4.581633 |
| H | 3.390138  | -6.015366 | -5.326808 |
| H | 4.200409  | -6.518647 | -7.614501 |
| H | 2.750722  | -6.035341 | -9.586533 |
| H | 0.480986  | -5.057689 | -9.231231 |
| H | -0.315672 | -4.562950 | -6.944152 |
| H | -4.003819 | -8.840154 | -4.883439 |
| H | 2.617437  | -4.269412 | 2.525045  |
| H | 4.502349  | -4.166384 | 0.871548  |
| H | -4.519572 | -9.322163 | -2.445710 |
| H | 2.867011  | -2.294331 | -0.931957 |
| H | 3.415926  | -0.440601 | -2.474824 |
| H | 4.564884  | -0.909985 | -4.637340 |
| H | 5.188660  | -3.249991 | -5.221974 |
| H | 4.703327  | -5.096455 | -3.645533 |
| H | 6.148798  | -5.095395 | -0.869496 |
| H | 7.932476  | -6.788683 | -1.162070 |
| H | 7.346174  | -9.120147 | -1.817425 |
| H | 4.956909  | -9.744877 | -2.163009 |
| H | 3.166037  | -8.053557 | -1.839319 |
| H | 0.871716  | -2.725611 | 2.374057  |

|   |           |            |           |
|---|-----------|------------|-----------|
| H | -0.984686 | -1.220953  | 2.994960  |
| H | -3.338751 | -1.864928  | 2.503529  |
| H | -3.813893 | -4.040358  | 1.368960  |
| H | -1.964461 | -5.532174  | 0.720377  |
| H | 2.505853  | -7.815579  | 1.186000  |
| H | 2.603849  | -9.662868  | 2.826198  |
| H | 1.044451  | -9.693630  | 4.772620  |
| H | -0.597182 | -7.844876  | 5.067606  |
| H | -0.704213 | -5.998522  | 3.419609  |
| H | -4.672641 | -7.036375  | -1.064545 |
| H | -5.759045 | -6.244003  | 1.013992  |
| H | -4.737834 | -6.751285  | 3.230053  |
| H | -2.603269 | -8.034493  | 3.340811  |
| H | -1.508016 | -8.817481  | 1.265765  |
| H | -3.408850 | -10.726301 | 0.076168  |
| H | -2.878806 | -13.129427 | 0.345494  |
| H | -0.905193 | -14.112210 | -0.814777 |
| H | 0.531016  | -12.666536 | -2.252037 |
| H | 0.001633  | -10.255947 | -2.515769 |
| H | -2.160646 | -10.822678 | -4.757218 |
| H | -0.811298 | -12.659283 | -5.709753 |
| H | 1.416024  | -12.183774 | -6.724961 |
| H | 2.271241  | -9.838821  | -6.780875 |
| H | 0.931114  | -8.002175  | -5.831822 |
| H | -1.487059 | -8.145004  | -7.434193 |
| H | -2.211480 | -6.670745  | -9.279392 |
| H | -3.226335 | -4.447993  | -8.784379 |
| H | -3.496174 | -3.715872  | -6.416569 |
| H | -2.762018 | -5.179386  | -4.571028 |

**[Fe<sub>2</sub>(SBn)(S)(CO)<sub>2</sub>(dppv)<sub>2</sub>]<sup>+</sup>**

|   |          |           |           |
|---|----------|-----------|-----------|
| C | 4.056498 | -7.814090 | -1.697818 |
| C | 4.449907 | -6.536937 | -1.278143 |
| C | 5.808680 | -6.276202 | -1.020879 |
| C | 6.756450 | -7.290597 | -1.169343 |
| C | 6.357701 | -8.568908 | -1.578575 |
| C | 5.010492 | -8.825876 | -1.846671 |
| P | 3.203232 | -5.177426 | -1.091150 |
| C | 3.559693 | -4.471836 | 0.585568  |

|    |           |           |           |
|----|-----------|-----------|-----------|
| C  | 2.585583  | -4.518571 | 1.499806  |
| P  | 0.998590  | -5.347055 | 1.021866  |
| Fe | 1.077028  | -5.697229 | -1.197177 |
| C  | 0.547442  | -4.032028 | -1.489718 |
| O  | 0.118464  | -2.975151 | -1.706072 |
| C  | 0.988110  | -6.778314 | 2.203679  |
| C  | 0.037404  | -6.900502 | 3.225708  |
| C  | 0.056680  | -8.018970 | 4.066424  |
| C  | 1.018881  | -9.016594 | 3.891646  |
| C  | 1.976863  | -8.889869 | 2.878155  |
| C  | 1.963996  | -7.776627 | 2.037692  |
| C  | -0.353732 | -4.234066 | 1.590077  |
| C  | -0.109457 | -3.002929 | 2.216835  |
| C  | -1.179589 | -2.174874 | 2.568408  |
| C  | -2.492801 | -2.569410 | 2.296868  |
| C  | -2.737251 | -3.793575 | 1.665780  |
| C  | -1.674082 | -4.621501 | 1.304447  |
| S  | 1.121092  | -6.312929 | -3.385449 |
| Fe | -0.815235 | -7.164850 | -2.507637 |
| S  | 0.510471  | -7.787309 | -0.897444 |
| C  | 1.041173  | -4.841478 | -4.554660 |
| C  | 1.499288  | -5.233744 | -5.936612 |
| C  | 0.682112  | -5.006341 | -7.051616 |
| C  | 1.107309  | -5.368072 | -8.334122 |
| C  | 2.355290  | -5.967982 | -8.519341 |
| C  | 3.180182  | -6.200030 | -7.411864 |
| C  | 2.755495  | -5.834519 | -6.133797 |
| C  | -1.917215 | -5.833373 | -2.299948 |
| O  | -2.631949 | -4.947521 | -2.043763 |
| P  | -1.660593 | -7.805027 | -4.475494 |
| C  | -2.092330 | -6.656673 | -5.862576 |
| C  | -2.567280 | -5.368873 | -5.568627 |
| C  | -3.002634 | -4.529142 | -6.597253 |
| C  | -2.962573 | -4.965006 | -7.925630 |
| C  | -2.485634 | -6.245382 | -8.222187 |
| C  | -2.055263 | -7.091628 | -7.197473 |
| P  | -2.275970 | -8.612536 | -1.616785 |
| C  | -3.153715 | -8.042648 | -0.105587 |
| C  | -4.336318 | -7.293836 | -0.210213 |

|   |           |            |           |
|---|-----------|------------|-----------|
| C | -4.955171 | -6.803509  | 0.942725  |
| C | -4.395668 | -7.052037  | 2.199698  |
| C | -3.208214 | -7.783411  | 2.302396  |
| C | -2.580705 | -8.273226  | 1.155979  |
| C | -0.643228 | -9.144693  | -5.241482 |
| C | -0.962013 | -10.496054 | -5.033675 |
| C | -0.126790 | -11.498014 | -5.536962 |
| C | 1.029473  | -11.158987 | -6.245058 |
| C | 1.348781  | -9.811288  | -6.453747 |
| C | 0.521746  | -8.805571  | -5.952316 |
| C | -3.297502 | -8.611801  | -4.141824 |
| C | -3.596312 | -8.919588  | -2.876463 |
| C | -1.757419 | -10.349070 | -1.224992 |
| C | -2.606721 | -11.186749 | -0.480786 |
| C | -2.257880 | -12.522716 | -0.267878 |
| C | -1.065752 | -13.030364 | -0.796716 |
| C | -0.222998 | -12.198874 | -1.539930 |
| C | -0.566385 | -10.861997 | -1.757450 |
| C | 3.799167  | -3.870027  | -2.250502 |
| C | 3.429068  | -2.533297  | -2.025279 |
| C | 3.761552  | -1.548752  | -2.957687 |
| C | 4.455372  | -1.891722  | -4.123910 |
| C | 4.829684  | -3.219924  | -4.348135 |
| C | 4.508270  | -4.207157  | -3.413080 |
| H | 1.712789  | -4.098629  | -4.109273 |
| H | 0.025522  | -4.439366  | -4.558193 |
| H | 3.392997  | -6.031061  | -5.275944 |
| H | 4.156235  | -6.662974  | -7.546287 |
| H | 2.684527  | -6.252870  | -9.516593 |
| H | 0.455989  | -5.185696  | -9.186193 |
| H | -0.296895 | -4.554837  | -6.917193 |
| H | -3.959824 | -8.821364  | -4.982338 |
| H | 2.727047  | -4.171954  | 2.523835  |
| H | 4.544927  | -4.055485  | 0.795932  |
| H | -4.523604 | -9.413168  | -2.584521 |
| H | 2.872137  | -2.261438  | -1.131046 |
| H | 3.472882  | -0.515435  | -2.776534 |
| H | 4.704641  | -1.125064  | -4.854344 |
| H | 5.368500  | -3.491165  | -5.253376 |

|   |           |            |           |
|---|-----------|------------|-----------|
| H | 4.814891  | -5.236009  | -3.583383 |
| H | 6.132322  | -5.281353  | -0.721959 |
| H | 7.805638  | -7.083337  | -0.967340 |
| H | 7.097566  | -9.358330  | -1.693523 |
| H | 4.695479  | -9.814364  | -2.175045 |
| H | 3.009777  | -8.015846  | -1.908725 |
| H | 0.906271  | -2.677117  | 2.426743  |
| H | -0.984684 | -1.220451  | 3.053013  |
| H | -3.322737 | -1.921529  | 2.571280  |
| H | -3.754205 | -4.106185  | 1.443217  |
| H | -1.873906 | -5.565680  | 0.803794  |
| H | 2.699356  | -7.695385  | 1.239829  |
| H | 2.729433  | -9.662821  | 2.736940  |
| H | 1.026593  | -9.887337  | 4.544221  |
| H | -0.681665 | -8.107258  | 4.861308  |
| H | -0.721741 | -6.134909  | 3.362918  |
| H | -4.773822 | -7.086569  | -1.184893 |
| H | -5.875752 | -6.229805  | 0.857490  |
| H | -4.878709 | -6.670148  | 3.096259  |
| H | -2.759244 | -7.968181  | 3.274530  |
| H | -1.648491 | -8.826261  | 1.241297  |
| H | -3.529598 | -10.797169 | -0.056315 |
| H | -2.916538 | -13.166456 | 0.311781  |
| H | -0.796614 | -14.071286 | -0.629484 |
| H | 0.705580  | -12.588117 | -1.952409 |
| H | 0.089999  | -10.218262 | -2.336039 |
| H | -1.851924 | -10.772851 | -4.474398 |
| H | -0.384107 | -12.542725 | -5.374271 |
| H | 1.677184  | -11.940643 | -6.637081 |
| H | 2.243829  | -9.538315  | -7.008848 |
| H | 0.784471  | -7.765006  | -6.121921 |
| H | -1.679802 | -8.081971  | -7.441287 |
| H | -2.444915 | -6.589169  | -9.253798 |
| H | -3.299567 | -4.309067  | -8.725424 |
| H | -3.368831 | -3.532978  | -6.357416 |
| H | -2.601703 | -5.011336  | -4.545167 |

**Fe<sub>2</sub>(SbN)<sub>2</sub>(CO)<sub>2</sub>(PMe<sub>3</sub>)<sub>4</sub>**

|   |          |           |           |
|---|----------|-----------|-----------|
| C | 6.513651 | -2.360620 | -3.479543 |
| C | 5.570428 | -3.251799 | -2.964689 |

|    |           |           |           |
|----|-----------|-----------|-----------|
| C  | 4.368078  | -2.786100 | -2.403580 |
| C  | 4.128727  | -1.403789 | -2.396827 |
| C  | 5.070492  | -0.507914 | -2.914136 |
| C  | 6.269855  | -0.982423 | -3.452163 |
| C  | 3.351655  | -3.747406 | -1.842606 |
| S  | 4.108603  | -5.032836 | -0.706690 |
| Fe | 2.537073  | -6.319441 | 0.359545  |
| P  | 2.072317  | -7.694635 | -1.332020 |
| Fe | 4.278395  | -4.795163 | 1.611537  |
| P  | 2.994288  | -3.059550 | 2.120180  |
| C  | 4.381281  | -5.057535 | 3.316743  |
| O  | 4.503836  | -5.202922 | 4.477515  |
| P  | 6.263309  | -3.767216 | 1.460444  |
| S  | 4.461878  | -7.104600 | 1.387566  |
| P  | 1.414921  | -7.401521 | 1.946207  |
| C  | 1.226176  | -5.236038 | 0.065366  |
| O  | 0.330535  | -4.497989 | -0.151760 |
| H  | 4.866772  | 0.561508  | -2.894375 |
| H  | 2.539360  | -3.224451 | -1.341341 |
| H  | 3.194234  | -1.024807 | -1.987358 |
| H  | 7.006443  | -0.286649 | -3.849464 |
| H  | 7.441901  | -2.741396 | -3.902483 |
| H  | 5.771524  | -4.321386 | -2.968138 |
| H  | 2.908598  | -4.338385 | -2.651396 |
| C  | 0.288497  | -8.218637 | -1.541628 |
| C  | 2.365271  | -7.022570 | -3.050744 |
| C  | 2.932494  | -9.347760 | -1.521842 |
| H  | 0.146189  | -8.763682 | -2.482926 |
| H  | -0.022919 | -8.860060 | -0.711703 |
| H  | -0.339041 | -7.321263 | -1.540908 |
| H  | 2.436853  | -9.958354 | -2.287089 |
| H  | 3.968388  | -9.170101 | -1.826121 |
| H  | 2.936231  | -9.883611 | -0.569048 |
| H  | 2.163180  | -7.785042 | -3.813126 |
| H  | 1.702202  | -6.167059 | -3.214005 |
| H  | 3.403339  | -6.685021 | -3.128163 |
| C  | -0.434785 | -7.179987 | 1.990958  |
| C  | 1.560346  | -9.266089 | 1.938379  |
| C  | 1.831977  | -7.106240 | 3.735603  |

|   |           |           |           |
|---|-----------|-----------|-----------|
| C | 7.141123  | -3.390307 | 3.060704  |
| C | 7.628292  | -4.621758 | 0.531000  |
| C | 6.327933  | -2.107152 | 0.604640  |
| H | -0.883457 | -7.811231 | 2.767134  |
| H | -0.664250 | -6.130098 | 2.198359  |
| H | -0.861749 | -7.433639 | 1.017043  |
| H | 1.205986  | -7.739534 | 4.376100  |
| H | 2.885936  | -7.340283 | 3.902683  |
| H | 1.670186  | -6.057048 | 3.982404  |
| H | 1.027550  | -9.703998 | 2.791583  |
| H | 1.155088  | -9.681898 | 1.012178  |
| H | 2.624291  | -9.514699 | 2.004050  |
| H | 8.107574  | -2.905328 | 2.874583  |
| H | 6.519200  | -2.741223 | 3.683198  |
| H | 7.300673  | -4.329505 | 3.600200  |
| H | 8.485266  | -3.948562 | 0.402381  |
| H | 7.941758  | -5.513163 | 1.078290  |
| H | 7.248615  | -4.928302 | -0.447075 |
| H | 7.329645  | -1.668057 | 0.692827  |
| H | 6.087712  | -2.248639 | -0.452178 |
| H | 5.594933  | -1.417502 | 1.031106  |
| C | 3.738954  | -1.872398 | 3.366754  |
| C | 2.363984  | -1.830885 | 0.868633  |
| C | 1.410168  | -3.412989 | 3.044491  |
| H | 3.002366  | -1.117778 | 3.667906  |
| H | 4.057702  | -2.437678 | 4.247987  |
| H | 4.611457  | -1.367655 | 2.943480  |
| H | 0.869349  | -2.480529 | 3.251167  |
| H | 0.781911  | -4.079972 | 2.452997  |
| H | 1.665504  | -3.893986 | 3.993468  |
| H | 1.939707  | -0.962812 | 1.387115  |
| H | 3.187678  | -1.508479 | 0.227811  |
| H | 1.582552  | -2.298078 | 0.263679  |
| C | 5.673223  | -7.838373 | 0.151699  |
| C | 7.100251  | -7.965054 | 0.632741  |
| H | 5.266599  | -8.837590 | -0.044574 |
| H | 5.630813  | -7.267875 | -0.781130 |
| C | 8.142818  | -7.907377 | -0.306235 |
| C | 9.476564  | -8.039281 | 0.088117  |



|   |           |           |           |
|---|-----------|-----------|-----------|
| C | 9.792331  | -8.229687 | 1.437542  |
| C | 8.762255  | -8.291206 | 2.381488  |
| C | 7.427973  | -8.163428 | 1.982461  |
| H | 7.904462  | -7.736754 | -1.355900 |
| H | 10.269683 | -7.983383 | -0.656011 |
| H | 10.830589 | -8.324931 | 1.750449  |
| H | 8.997108  | -8.436116 | 3.434946  |
| H | 6.632244  | -8.193088 | 2.723481  |

**[Fe<sub>2</sub>(SBn)<sub>2</sub>(CO)<sub>2</sub>(PMe<sub>3</sub>)<sub>4</sub>]<sup>+</sup>**

|    |           |           |           |
|----|-----------|-----------|-----------|
| C  | 4.920364  | -4.312712 | -4.159724 |
| C  | 4.176660  | -4.707660 | -3.036878 |
| C  | 3.188763  | -5.693506 | -3.198604 |
| C  | 2.932676  | -6.245917 | -4.455916 |
| C  | 3.668282  | -5.831567 | -5.571746 |
| C  | 4.669030  | -4.868252 | -5.418257 |
| C  | 4.490320  | -4.115977 | -1.681984 |
| S  | 2.983772  | -3.816342 | -0.610738 |
| Fe | 1.633720  | -1.947211 | -0.564924 |
| P  | -0.532937 | -1.161770 | -0.608860 |
| C  | -1.749556 | -1.699359 | 0.695014  |
| Fe | 3.416618  | -2.617071 | 1.285575  |
| P  | 4.366725  | -4.247216 | 2.486551  |
| C  | 3.388412  | -5.084591 | 3.820853  |
| S  | 1.150025  | -2.921743 | 1.537273  |
| C  | 0.418007  | -4.619594 | 1.173094  |
| C  | 0.071947  | -5.401989 | 2.412958  |
| C  | 0.446927  | -6.751503 | 2.505423  |
| C  | 0.112603  | -7.510652 | 3.631229  |
| C  | -0.598961 | -6.926425 | 4.682705  |
| C  | -0.981519 | -5.582669 | 4.598088  |
| C  | -0.650440 | -4.827585 | 3.470805  |
| P  | 3.282468  | -1.077485 | 2.994086  |
| C  | 1.841282  | 0.108198  | 2.988592  |
| C  | 2.479287  | -0.480591 | -0.070161 |
| O  | 2.954657  | 0.591996  | 0.004987  |
| C  | 3.103767  | -1.700439 | 4.739429  |
| C  | 4.719613  | 0.084254  | 3.124503  |

|   |           |           |           |
|---|-----------|-----------|-----------|
| P | 2.098657  | -1.286618 | -2.683688 |
| C | 1.558531  | -2.419477 | -4.048823 |
| C | 1.438646  | 0.366032  | -3.232815 |
| C | 3.895022  | -0.997360 | -3.045746 |
| C | -0.677743 | 0.679422  | -0.404546 |
| C | -1.556767 | -1.532517 | -2.123505 |
| C | 4.938835  | -5.724368 | 1.515404  |
| C | 5.951543  | -3.789194 | 3.344207  |
| H | -0.477783 | -4.408712 | 0.577366  |
| H | 1.112157  | -5.173698 | 0.536341  |
| H | 1.004367  | -7.211155 | 1.689606  |
| H | 0.407500  | -8.556766 | 3.686403  |
| H | -0.858779 | -7.514675 | 5.560216  |
| H | -1.542805 | -5.125194 | 5.410576  |
| H | -0.946289 | -3.781759 | 3.410578  |
| H | 5.074931  | -4.830359 | -1.093416 |
| H | 5.084548  | -3.203395 | -1.759271 |
| H | 2.606945  | -6.017392 | -2.338120 |
| H | 2.160958  | -7.005593 | -4.564551 |
| H | 3.468671  | -6.262975 | -6.550164 |
| H | 5.258160  | -4.550450 | -6.276140 |
| H | 5.715213  | -3.575949 | -4.049667 |
| H | 3.994251  | -0.384436 | -3.947981 |
| H | 4.362040  | -0.483448 | -2.201630 |
| H | 4.391964  | -1.948900 | -3.216554 |
| H | 1.815962  | -1.982384 | -5.020438 |
| H | 2.062019  | -3.382498 | -3.936992 |
| H | 0.477606  | -2.577277 | -3.994446 |
| H | 1.780471  | 0.566342  | -4.254050 |
| H | 0.348533  | 0.403736  | -3.216538 |
| H | 1.835592  | 1.138753  | -2.566941 |
| H | 4.569008  | 0.788825  | 3.949787  |
| H | 5.641265  | -0.482513 | 3.288217  |
| H | 4.810147  | 0.634100  | 2.182930  |
| H | 1.806477  | 0.630925  | 3.950582  |
| H | 1.958046  | 0.837646  | 2.186408  |
| H | 0.910916  | -0.449586 | 2.846038  |
| H | 3.052862  | -0.847779 | 5.425703  |
| H | 2.174223  | -2.273601 | 4.811076  |

|   |           |           |           |
|---|-----------|-----------|-----------|
| H | 3.942845  | -2.334983 | 5.031975  |
| H | 6.361302  | -4.656636 | 3.873636  |
| H | 6.672779  | -3.448904 | 2.594257  |
| H | 5.789595  | -2.977560 | 4.057939  |
| H | 5.295430  | -6.503610 | 2.198406  |
| H | 4.111780  | -6.109112 | 0.912955  |
| H | 5.760110  | -5.429292 | 0.856115  |
| H | 4.019935  | -5.825800 | 4.324503  |
| H | 3.019592  | -4.365596 | 4.551741  |
| H | 2.527782  | -5.584058 | 3.371115  |
| H | -2.697396 | -1.172294 | 0.537397  |
| H | -1.927894 | -2.776344 | 0.635888  |
| H | -1.357476 | -1.465221 | 1.687404  |
| H | -1.721309 | 0.994901  | -0.516786 |
| H | -0.329171 | 0.931796  | 0.602344  |
| H | -0.051663 | 1.209264  | -1.122947 |
| H | -2.558666 | -1.102440 | -2.011897 |
| H | -1.099478 | -1.133971 | -3.030932 |
| H | -1.644483 | -2.619357 | -2.228993 |
| C | 4.954356  | -2.005225 | 0.737725  |
| O | 5.971003  | -1.602927 | 0.331708  |

**Fe<sub>2</sub>(SBn)(S)(CO)<sub>2</sub>(PMe<sub>3</sub>)<sub>4</sub>**

|    |          |           |           |
|----|----------|-----------|-----------|
| C  | 5.471184 | -1.915236 | -4.147852 |
| C  | 4.735427 | -2.796860 | -3.353012 |
| C  | 3.775277 | -2.320614 | -2.441949 |
| C  | 3.576441 | -0.932307 | -2.356680 |
| C  | 4.311537 | -0.046530 | -3.151146 |
| C  | 5.262894 | -0.534754 | -4.050525 |
| C  | 2.936620 | -3.264662 | -1.618619 |
| S  | 3.941583 | -4.621396 | -0.784171 |
| Fe | 2.636639 | -6.224480 | 0.184920  |
| P  | 2.383576 | -7.397142 | -1.684943 |
| Fe | 4.442487 | -4.580789 | 1.484902  |
| P  | 3.282618 | -2.847099 | 2.347734  |
| C  | 4.804590 | -5.032620 | 3.117586  |
| O  | 5.082066 | -5.336586 | 4.220533  |
| P  | 6.444744 | -3.676791 | 1.124817  |
| S  | 4.641771 | -6.770997 | 1.028528  |

|   |           |            |           |
|---|-----------|------------|-----------|
| P | 1.796945  | -7.693133  | 1.640536  |
| C | 1.149876  | -5.308602  | 0.135811  |
| O | 0.169332  | -4.650915  | 0.133800  |
| H | 4.137521  | 1.027965   | -3.067523 |
| H | 2.342011  | -2.722690  | -0.879828 |
| H | 2.824225  | -0.541720  | -1.667833 |
| H | 5.836869  | 0.153823   | -4.673026 |
| H | 6.209866  | -2.307492  | -4.849583 |
| H | 4.913974  | -3.871315  | -3.423658 |
| H | 2.234202  | -3.810967  | -2.263545 |
| C | 0.980282  | -8.611588  | -1.905943 |
| C | 2.146036  | -6.426579  | -3.259646 |
| C | 3.845974  | -8.448481  | -2.154244 |
| H | 1.017169  | -9.071291  | -2.904644 |
| H | 1.032416  | -9.407445  | -1.152036 |
| H | 0.022974  | -8.085460  | -1.791758 |
| H | 3.696142  | -8.945702  | -3.124497 |
| H | 4.731469  | -7.801739  | -2.195779 |
| H | 4.020586  | -9.199902  | -1.374270 |
| H | 2.075816  | -7.097201  | -4.128433 |
| H | 1.223864  | -5.834258  | -3.189679 |
| H | 2.994089  | -5.745000  | -3.398664 |
| C | -0.040625 | -8.010604  | 1.592248  |
| C | 2.468974  | -9.431223  | 1.627889  |
| C | 1.997655  | -7.283224  | 3.442029  |
| C | 7.584485  | -3.462720  | 2.580421  |
| C | 7.511900  | -4.696662  | -0.005235 |
| C | 6.584713  | -2.000647  | 0.322302  |
| H | -0.336654 | -8.725498  | 2.373215  |
| H | -0.573061 | -7.063404  | 1.748303  |
| H | -0.334665 | -8.407408  | 0.613261  |
| H | 1.542159  | -8.063176  | 4.069770  |
| H | 3.065259  | -7.195871  | 3.672990  |
| H | 1.514660  | -6.320712  | 3.650658  |
| H | 2.018051  | -10.031933 | 2.431054  |
| H | 2.265032  | -9.915524  | 0.664082  |
| H | 3.555836  | -9.378153  | 1.770723  |
| H | 8.559798  | -3.068644  | 2.259925  |
| H | 7.139990  | -2.773581  | 3.309782  |

|   |          |           |           |
|---|----------|-----------|-----------|
| H | 7.728959 | -4.432334 | 3.073882  |
| H | 8.489138 | -4.219375 | -0.170403 |
| H | 7.647064 | -5.690086 | 0.441043  |
| H | 6.988350 | -4.823509 | -0.961002 |
| H | 7.637486 | -1.730719 | 0.152037  |
| H | 6.052073 | -2.011857 | -0.636956 |
| H | 6.123228 | -1.239493 | 0.965370  |
| C | 4.192717 | -1.854558 | 3.644297  |
| C | 2.551458 | -1.434775 | 1.365362  |
| C | 1.776727 | -3.322660 | 3.338633  |
| H | 3.519839 | -1.138472 | 4.137763  |
| H | 4.611546 | -2.531474 | 4.400275  |
| H | 5.018682 | -1.299895 | 3.179420  |
| H | 1.308133 | -2.439720 | 3.798597  |
| H | 1.053781 | -3.816319 | 2.677495  |
| H | 2.074429 | -4.026675 | 4.125868  |
| H | 2.214175 | -0.639226 | 2.045999  |
| H | 3.297531 | -1.025686 | 0.672980  |
| H | 1.685737 | -1.790631 | 0.792192  |

**[Fe<sub>2</sub>(SBn)(S)(CO)<sub>2</sub>(PMe<sub>3</sub>)<sub>4</sub>]<sup>+</sup>**

|    |           |           |           |
|----|-----------|-----------|-----------|
| C  | 4.920364  | -4.312712 | -4.159724 |
| C  | 4.176660  | -4.707660 | -3.036878 |
| C  | 3.188763  | -5.693506 | -3.198604 |
| C  | 2.932676  | -6.245917 | -4.455916 |
| C  | 3.668282  | -5.831567 | -5.571746 |
| C  | 4.669030  | -4.868252 | -5.418257 |
| C  | 4.490320  | -4.115977 | -1.681984 |
| S  | 2.983772  | -3.816342 | -0.610738 |
| Fe | 1.633720  | -1.947211 | -0.564924 |
| P  | -0.532937 | -1.161770 | -0.608860 |
| C  | -1.749556 | -1.699359 | 0.695014  |
| Fe | 3.416618  | -2.617071 | 1.285575  |
| P  | 4.366725  | -4.247216 | 2.486551  |
| C  | 3.388412  | -5.084591 | 3.820853  |
| S  | 1.150025  | -2.921743 | 1.537273  |
| C  | 0.418007  | -4.619594 | 1.173094  |
| C  | 0.071947  | -5.401989 | 2.412958  |
| C  | 0.446927  | -6.751503 | 2.505423  |

|   |           |           |           |
|---|-----------|-----------|-----------|
| C | 0.112603  | -7.510652 | 3.631229  |
| C | -0.598961 | -6.926425 | 4.682705  |
| C | -0.981519 | -5.582669 | 4.598088  |
| C | -0.650440 | -4.827585 | 3.470805  |
| P | 3.282468  | -1.077485 | 2.994086  |
| C | 1.841282  | 0.108198  | 2.988592  |
| C | 2.479287  | -0.480591 | -0.070161 |
| O | 2.954657  | 0.591996  | 0.004987  |
| C | 3.103767  | -1.700439 | 4.739429  |
| C | 4.719613  | 0.084254  | 3.124503  |
| P | 2.098657  | -1.286618 | -2.683688 |
| C | 1.558531  | -2.419477 | -4.048823 |
| C | 1.438646  | 0.366032  | -3.232815 |
| C | 3.895022  | -0.997360 | -3.045746 |
| C | -0.677743 | 0.679422  | -0.404546 |
| C | -1.556767 | -1.532517 | -2.123505 |
| C | 4.938835  | -5.724368 | 1.515404  |
| C | 5.951543  | -3.789194 | 3.344207  |
| H | -0.477783 | -4.408712 | 0.577366  |
| H | 1.112157  | -5.173698 | 0.536341  |
| H | 1.004367  | -7.211155 | 1.689606  |
| H | 0.407500  | -8.556766 | 3.686403  |
| H | -0.858779 | -7.514675 | 5.560216  |
| H | -1.542805 | -5.125194 | 5.410576  |
| H | -0.946289 | -3.781759 | 3.410578  |
| H | 5.074931  | -4.830359 | -1.093416 |
| H | 5.084548  | -3.203395 | -1.759271 |
| H | 2.606945  | -6.017392 | -2.338120 |
| H | 2.160958  | -7.005593 | -4.564551 |
| H | 3.468671  | -6.262975 | -6.550164 |
| H | 5.258160  | -4.550450 | -6.276140 |
| H | 5.715213  | -3.575949 | -4.049667 |
| H | 3.994251  | -0.384436 | -3.947981 |
| H | 4.362040  | -0.483448 | -2.201630 |
| H | 4.391964  | -1.948900 | -3.216554 |
| H | 1.815962  | -1.982384 | -5.020438 |
| H | 2.062019  | -3.382498 | -3.936992 |
| H | 0.477606  | -2.577277 | -3.994446 |
| H | 1.780471  | 0.566342  | -4.254050 |

|   |           |           |           |
|---|-----------|-----------|-----------|
| H | 0.348533  | 0.403736  | -3.216538 |
| H | 1.835592  | 1.138753  | -2.566941 |
| H | 4.569008  | 0.788825  | 3.949787  |
| H | 5.641265  | -0.482513 | 3.288217  |
| H | 4.810147  | 0.634100  | 2.182930  |
| H | 1.806477  | 0.630925  | 3.950582  |
| H | 1.958046  | 0.837646  | 2.186408  |
| H | 0.910916  | -0.449586 | 2.846038  |
| H | 3.052862  | -0.847779 | 5.425703  |
| H | 2.174223  | -2.273601 | 4.811076  |
| H | 3.942845  | -2.334983 | 5.031975  |
| H | 6.361302  | -4.656636 | 3.873636  |
| H | 6.672779  | -3.448904 | 2.594257  |
| H | 5.789595  | -2.977560 | 4.057939  |
| H | 5.295430  | -6.503610 | 2.198406  |
| H | 4.111780  | -6.109112 | 0.912955  |
| H | 5.760110  | -5.429292 | 0.856115  |
| H | 4.019935  | -5.825800 | 4.324503  |
| H | 3.019592  | -4.365596 | 4.551741  |
| H | 2.527782  | -5.584058 | 3.371115  |
| H | -2.697396 | -1.172294 | 0.537397  |
| H | -1.927894 | -2.776344 | 0.635888  |
| H | -1.357476 | -1.465221 | 1.687404  |
| H | -1.721309 | 0.994901  | -0.516786 |
| H | -0.329171 | 0.931796  | 0.602344  |
| H | -0.051663 | 1.209264  | -1.122947 |
| H | -2.558666 | -1.102440 | -2.011897 |
| H | -1.099478 | -1.133971 | -3.030932 |
| H | -1.644483 | -2.619357 | -2.228993 |
| C | 4.954356  | -2.005225 | 0.737725  |
| O | 5.971003  | -1.602927 | 0.331708  |

**Fe<sub>2</sub>(SBn)(S)(CO)<sub>4</sub>(PMe<sub>3</sub>)<sub>2</sub>**

|   |          |          |           |
|---|----------|----------|-----------|
| C | 6.840313 | 2.391478 | -1.779323 |
| C | 6.743056 | 1.017279 | -2.021261 |
| C | 6.226733 | 0.167070 | -1.039946 |
| C | 5.808420 | 0.678673 | 0.198134  |
| C | 5.899922 | 2.060535 | 0.427729  |
| C | 6.414984 | 2.911741 | -0.551770 |

|    |           |           |           |
|----|-----------|-----------|-----------|
| C  | 5.238308  | -0.233298 | 1.245910  |
| S  | 3.359004  | -0.198435 | 1.155353  |
| Fe | 2.490156  | -1.889298 | -0.125350 |
| S  | 0.639806  | -1.184823 | 0.920416  |
| Fe | 2.145817  | -1.625216 | 2.525301  |
| P  | 3.715828  | -2.999343 | 3.444469  |
| C  | 2.029386  | -0.440234 | 3.836102  |
| O  | 1.929175  | 0.351866  | 4.678884  |
| C  | 0.937251  | -2.729633 | 3.172866  |
| O  | 0.136079  | -3.445051 | 3.621634  |
| C  | 2.667578  | -1.118911 | -1.712090 |
| O  | 2.800136  | -0.634421 | -2.759402 |
| P  | 1.227450  | -3.544168 | -0.944796 |
| C  | 3.937671  | -2.898586 | -0.115511 |
| O  | 4.901643  | -3.560561 | -0.091384 |
| H  | 6.484828  | 3.980752  | -0.358488 |
| H  | 5.592648  | -1.253552 | 1.113177  |
| H  | 5.560924  | 2.466306  | 1.380069  |
| H  | 7.242954  | 3.054256  | -2.543063 |
| H  | 7.068131  | 0.607740  | -2.975943 |
| H  | 6.147558  | -0.901912 | -1.230970 |
| H  | 5.493272  | 0.111766  | 2.253606  |
| C  | 2.069316  | -4.616454 | -2.205124 |
| C  | 0.578813  | -4.778306 | 0.273793  |
| C  | -0.297090 | -3.011032 | -1.852239 |
| H  | -0.004475 | -5.553063 | -0.238177 |
| H  | 1.419061  | -5.238984 | 0.801680  |
| H  | -0.048825 | -4.257733 | 1.001357  |
| H  | 1.386302  | -5.388344 | -2.578571 |
| H  | 2.401321  | -3.989101 | -3.039142 |
| H  | 2.948255  | -5.088934 | -1.755466 |
| H  | -0.825563 | -3.881404 | -2.258497 |
| H  | -0.946655 | -2.465513 | -1.162174 |
| H  | -0.006978 | -2.339678 | -2.666565 |
| C  | 3.526120  | -3.084605 | 5.293522  |
| C  | 3.530796  | -4.790266 | 2.973620  |
| C  | 5.563533  | -2.815838 | 3.304275  |
| H  | 4.197199  | -3.836504 | 5.725630  |
| H  | 3.752775  | -2.101669 | 5.719045  |



|   |          |           |          |
|---|----------|-----------|----------|
| H | 2.489174 | -3.334351 | 5.537952 |
| H | 6.038630 | -3.536903 | 3.980426 |
| H | 5.880642 | -3.027180 | 2.280767 |
| H | 5.870553 | -1.804544 | 3.581364 |
| H | 4.213300 | -5.416068 | 3.561049 |
| H | 2.498617 | -5.103180 | 3.155221 |
| H | 3.758901 | -4.903630 | 1.910323 |

**[Fe<sub>2</sub>(SBn)(S)(CO)<sub>4</sub>(PMe<sub>3</sub>)<sub>2</sub>]<sup>+</sup>**

|    |          |            |            |
|----|----------|------------|------------|
| Fe | 3.352764 | -9.842953  | -7.410583  |
| Fe | 4.585468 | -7.212669  | -7.348560  |
| P  | 6.382582 | -6.652599  | -8.629076  |
| H  | 8.131761 | -7.903679  | -7.483397  |
| C  | 2.820435 | -13.127922 | -6.480810  |
| P  | 2.934848 | -11.391385 | -5.870121  |
| C  | 4.250454 | -11.431048 | -4.575953  |
| S  | 3.037338 | -8.123783  | -5.918681  |
| C  | 3.472670 | -6.404592  | -8.465759  |
| O  | 2.730698 | -5.967706  | -9.237816  |
| S  | 5.467492 | -9.211224  | -7.216763  |
| C  | 4.847359 | -5.794194  | -6.321053  |
| O  | 5.079569 | -4.896573  | -5.635554  |
| C  | 8.006446 | -6.857946  | -7.777358  |
| C  | 6.377060 | -4.889172  | -9.177388  |
| C  | 6.525100 | -7.620176  | -10.193427 |
| C  | 1.673987 | -9.770599  | -8.034824  |
| O  | 0.602745 | -9.675872  | -8.455336  |
| C  | 3.886590 | -11.010120 | -8.652308  |
| O  | 4.233140 | -11.759585 | -9.457115  |
| C  | 1.367933 | -11.139945 | -4.926025  |
| H  | 1.237808 | -11.949326 | -4.198648  |
| H  | 1.417024 | -10.181734 | -4.401372  |
| H  | 0.518318 | -11.129411 | -5.615315  |
| H  | 4.001675 | -12.177607 | -3.812681  |
| H  | 5.206430 | -11.678416 | -5.045616  |
| H  | 4.324304 | -10.438426 | -4.122957  |
| H  | 2.621702 | -13.799542 | -5.637706  |
| H  | 2.009803 | -13.211016 | -7.211358  |
| H  | 3.761627 | -13.412721 | -6.960148  |

|   |          |           |            |
|---|----------|-----------|------------|
| H | 8.820350 | -6.561230 | -8.448236  |
| H | 8.023226 | -6.230888 | -6.880490  |
| H | 7.273687 | -4.676967 | -9.769695  |
| H | 5.486730 | -4.696734 | -9.783677  |
| H | 6.356886 | -4.234793 | -8.300579  |
| H | 7.376755 | -7.259866 | -10.781288 |
| H | 6.661966 | -8.676836 | -9.947219  |
| H | 5.604570 | -7.506438 | -10.774417 |
| C | 1.370636 | -7.243035 | -6.023652  |
| C | 1.499728 | -5.885720 | -5.396651  |
| H | 1.062950 | -7.192005 | -7.069401  |
| H | 0.676558 | -7.890628 | -5.475729  |
| C | 1.495285 | -4.730328 | -6.192445  |
| C | 1.653109 | -3.470671 | -5.608180  |
| C | 1.828898 | -3.355849 | -4.226185  |
| C | 1.834341 | -4.504136 | -3.425558  |
| C | 1.670033 | -5.761078 | -4.007736  |
| H | 1.348682 | -4.815247 | -7.266835  |
| H | 1.634213 | -2.579121 | -6.231349  |
| H | 1.952486 | -2.375435 | -3.771487  |
| H | 1.960593 | -4.416933 | -2.348541  |
| H | 1.677396 | -6.654608 | -3.384761  |

**Fe<sub>2</sub>(SBn)(S)(CO)<sub>6</sub>**

|    |          |           |           |
|----|----------|-----------|-----------|
| C  | 7.435792 | 2.165242  | -1.276454 |
| C  | 7.282122 | 0.799270  | -1.524296 |
| C  | 6.519811 | -0.000024 | -0.657964 |
| C  | 5.909882 | 0.595773  | 0.457905  |
| C  | 6.064536 | 1.960822  | 0.707380  |
| C  | 6.826299 | 2.749769  | -0.161328 |
| C  | 6.308852 | -1.457685 | -0.949328 |
| S  | 4.684539 | -1.653740 | -1.891309 |
| Fe | 4.331901 | -3.754967 | -2.764835 |
| C  | 3.289554 | -4.425526 | -1.462455 |
| O  | 2.614748 | -4.842431 | -0.626356 |
| Fe | 4.922293 | -1.611732 | -4.190392 |
| C  | 4.651148 | 0.157903  | -4.393129 |
| O  | 4.472834 | 1.288912  | -4.516660 |
| C  | 4.862441 | -2.045011 | -5.932960 |

|   |          |           |           |
|---|----------|-----------|-----------|
| O | 4.821014 | -2.316488 | -7.051788 |
| C | 6.720930 | -1.674464 | -4.145711 |
| O | 7.873931 | -1.737409 | -4.115187 |
| S | 2.902701 | -2.563126 | -4.019194 |
| C | 4.125168 | -5.087485 | -3.956165 |
| O | 3.985593 | -5.936524 | -4.721878 |
| C | 5.939866 | -4.351932 | -2.204660 |
| O | 6.974300 | -4.717951 | -1.847477 |
| H | 5.591596 | 2.409144  | 1.578972  |
| H | 7.126823 | -1.891039 | -1.526716 |
| H | 5.311405 | -0.016348 | 1.131319  |
| H | 6.945681 | 3.814189  | 0.030962  |
| H | 8.031755 | 2.773975  | -1.953580 |
| H | 7.762517 | 0.347683  | -2.389440 |
| H | 6.171784 | -2.040982 | -0.032435 |

**[Fe<sub>2</sub>(SBn)(S)(CO)<sub>6</sub>]<sup>+</sup>**

|    |          |           |           |
|----|----------|-----------|-----------|
| Fe | 5.842841 | -1.889786 | -3.974522 |
| Fe | 3.900385 | -3.715301 | -2.847789 |
| C  | 5.377360 | 0.956351  | -0.260200 |
| H  | 9.223180 | 1.259586  | -0.723192 |
| C  | 8.145041 | 1.175073  | -0.606705 |
| C  | 6.600957 | -2.112739 | -5.621992 |
| C  | 3.665357 | -5.315965 | -3.706968 |
| C  | 4.516481 | -4.522609 | -1.316474 |
| C  | 6.206743 | -0.124374 | -3.925716 |
| O  | 6.394502 | 1.003276  | -3.935982 |
| S  | 4.035663 | -2.758356 | -4.822948 |
| S  | 4.511869 | -1.637098 | -2.108304 |
| C  | 5.493937 | -1.547603 | -0.488035 |
| C  | 6.153131 | -0.203143 | -0.440706 |
| C  | 7.541401 | -0.084238 | -0.617433 |
| C  | 7.365998 | 2.324429  | -0.435319 |
| C  | 5.981711 | 2.212985  | -0.257015 |
| C  | 7.338436 | -2.427350 | -3.095187 |
| O  | 8.235784 | -2.876898 | -2.541509 |
| O  | 7.080002 | -2.229221 | -6.652358 |
| C  | 2.198556 | -3.576027 | -2.343322 |
| O  | 1.099630 | -3.460010 | -2.043771 |

|   |          |           |           |
|---|----------|-----------|-----------|
| O | 4.937334 | -5.003540 | -0.367127 |
| O | 3.511857 | -6.316475 | -4.236122 |
| H | 6.204217 | -2.375489 | -0.444419 |
| H | 8.154246 | -0.975865 | -0.725771 |
| H | 7.837612 | 3.304443  | -0.427226 |
| H | 5.377330 | 3.104539  | -0.107713 |
| H | 4.301122 | 0.869625  | -0.117435 |
| H | 4.728729 | -1.676428 | 0.285461  |
